# Supplementary material for: DNA Damage Response Pathways in Dinoflagellates
Source: Microorganisms. 2019 Jul 5;7(7):191. doi: 10.3390/microorganisms7070191 (PMC6680887; doi:10.3390/microorganisms7070191)
Supplement: Supplementary file 1 [file microorganisms-07-00191-s001.zip › microorganisms-506447 supplementary table.xlsx]

## Sheet: C. cohnii DDR genes
Genes	Accession numbers	Sequences
CL691.Contig1_All	MN125952	ACAGCAGCAGCAACAGCAGCAGCCAGACGACTCGCAGAACGAAACCAGCCAGGGACGAGTCAGAATAGCAATCCCAACGCACCAGAACAGTCCATCAAAAAGGGCGAACTTGTCGGGAAACTCGAAGTGGAAGTGCACCAGAACGATCGAAGCGTCGAGCGGCGAAGGACGAGGCGCATTCGCTGTGGTCGTTCCGGAGAGTCCCATGAGGAATCCATTGGGACAGTCACCAGCCATCGGAACTTTGCTTCCCTGTGGGCCCAGCTCTGTCTCCATCGAAGTCGCCACCGCCGCCGTCGACAAAACCCCCAAAACCTCCGGAAAAAGTGCGAATTTTGGAGAGAAATCGGAGCCCCAAAGCCCCGTGAAGAGGCGCTGGACCAAGCAGCCAGCTTCGGA…
CL1148.Contig1_All	MN125953	CTTTCATAAGGTGATCAGACTGGCCCCTGCCCTGAATAGGACGGCAAATCAAAGTGAATGGCTTACCCACTCAAAAATTGTCAAGGCCCGTCAGGGGTCCAGCGAGGCATCGCTGGACTCCCAGGTCGGTCCCACAAGACGCGTGCAATGCGCTCTTCGACCCTCTTCGGGTTGAGCTCCAAATCGGGTTCCAGGCCTCAGTGGGCCTTTTTCTCGTAGGCGTTCGTGACCTGCGAGGGATCGTATTCCTCGGCCTTCAACATCTGGACGGCTGCGCTCTTGGCTTCCTCGAGCTGCGTCTTCTCGCGCTCGACCTTTGAGCACTTGGCGTGCAGAGCGGAGCGCTCGCTCGTGGCTTCCTTCTCGGCAAGCTTGGCTTCCTTCACGCGCTCCTTGGCA…
CL1934.Contig3_All	MN125954	CTCTTCCGTCGGGACTCGCCGGACCTTCTCCTCTTGGACGAGGAGGGCAAGAGTTGCCTGAGGTACGCCGTCGAGGCCACGGCGTACCGCATGTCCTACATCAAACTCATCGAGCTCTGGGCTAAGTTGGCCGGCGGGGAGACCATGAAGAAGCTTCTCACCACTGCCGATTCCAAGGGCGTCACGCCTCTGGTGGCGGCCTTGAAGAGCTCGCAGCGAGGCATGGCGCCAGTGATCGAGATGCTCCTCTCCCTGGCGGCCCAACAGTCAGAAGATGTGGTCAAACAGGTTCTTACGACTCCCGACAAGGAGGGTTTGACACCGTTGATGCACGCCGTCGACGCCGTCGACGGTGTCTTCTTGGTCAATTTGCTCCTCCGCTGGATGACAGCTCCCGTC…
CL2244.Contig1_All	MN125955	TTCCATTCGGGGCTAGTTCGTGAATTGGCAATGGGCAATGGTTGCCCAGGTGCCCTTCTCCAAAGAGGCGAAGTCATGCATGAAAGGCCACAGGATCGCGCTGGAATCGCAAACCTGGATGTTGTATGTACAAGGGGCGGTTGGACACGAAGCTGTGGGCCTGTCCCCATGTTCAAAGGACAGGGCACGTATGAAGCTCGGCCTGGCCATATAACTATCCCTGCCTCGCAGGTGAGCACTTGCTCTTGTTCCGAATCATTGTGGTGGGACACTGTGGAAGACCACTGTGGAAGACCACATCGCACAGTGCCCACAATGACTGCCACAAATTGACTATTCACAATAAGGACGTCGCTGATGATGCCGGGCTCTACAACACATCGTCCAGGGTCGCTGGCA…
CL2244.Contig2_All	MN125956	TTCCATTCGGGGCTAGTTCGTGAATTGGCAATGGGCAATGGTTGCCCAGGTGCCCTTCTCCAAAGAGGCGAAGTCATGCATGAAAGGCCACAGGATCGCGCTGGAATCGCAAACCTGGATGTTGTATGTACAAGGGGCGGTTGGACACGAAGCTGTGGGCCTGTCCCCATGTTCAAAGGACAGGGCACGTATGAAGCTCGGCCTGGCCATATAACTATCCCTGCCTCGCAGGTGAGCACTTGCTCTTGTTCCGAATCATTGTGGTGGGACACTGTGGAAGACCACTGTGGAAGACCACATCGCACAGTGCCCACAATGACTGCCACAAATTGACTATTCACAATAAGGACGTCGCTGATGATGCCGGGCTCTACAACACATCGTCCAGGGTCGCTGGCA…
CL2432.Contig2_All	MN125957	CTTCTTGGAGGGTCCTCCGCTTTGCGAGCTGGCTCGCCGCTTTCGCGAGCCGCTGCCGCTGCCACTGCCACCAATGCCACCCGTCGCTGAGTTCTCATCTCTGGAGGCCTCTGCAAGTGTAGTGCTGCCGTCAGCAGACGTCGAAGGGTCGCCGCCTGGCTGCGCAGTCTTTAAGACCGCTGCTGCGGGACGCTTGGCGAAGCTAACCCGATCAGACCCTGGTTTGCCCTTTCCTTTGAAGTCCGAGGGTGCTTTCTTCTTGTTTTTGCCTTTGTTCTTCTTCAACGCTGCCTTGAACTTCGACAAATTCTTAGATTTTGCCGATTTGTGATCGACGATGGGTTTGGGGTAGTCCTTTCCGATGACGCAGCCAGCGTCTTTCTGGACCTCTTTTGGGGC…
CL2462.Contig1_All	MN125958	AAAATTGATCGGCCATTAATTTCCCCAGCAAGAGTGGTTTCCCACTCAAGCCATATCTTCGGCAGCTCAGAGCCCGCGCAAAGTTGCTGCAGGGGCAAACTGGCCTAACGAAGCTTGCCGACTACTCGCTTCGCGCCCTAGCAAACATCGCCGTCTGGCATCTCGTGACGGTGGCCATCGCGGCGAGTCTTTGAGTTTCAACGGTAAGACGACGAAGCTCCACTGCGAGCTCACCATCAAATGCTCGCTCACATGTCGTCATCATCCATCTCCGTCTTCCCAACGGAGGCCTGCGACTCGAACATGTCGCAGATCTGGTCGGGTCCAGAGGACTCCTCGGGGGGCTTGTCATCTCGGATTCGGAGGAACCTCGGGAAGCGGAGGGCAATGCCCTTACCG…
CL2939.Contig1_All	MN125959	GATCGGGCTTGACATGGACGCGCTACTGTTTTTCTCAAGCATTCTGTACTCGCTCCCTCTGCGTCGCTTGCCTTGTGCGCTTGCTTATCCTGCTTTCCCTCGCCTTTCTTTCTTAATTCCTCCATCATCATGGCGTTCGAGGCTCACCTCTCCCAGGCTCTCCTGTTGAAGAAGGTTGTGGACGCCATGAAGGACCTCTGTAAAGAGGTGAACTTTGACTGCAGCGAGACGGGCATGCAGGTGCAGGCCATGGACAGCTCGCACGTGGCCTTGGTCTCCTTGCTCCTGCGAGAGTCTGCCTTCTCGGAGTTCAAGTGCGAGCGCCCGGTCTCCCTGGGCATGAACGTGGAGTCCCTCTCCAAGGTCCTGAAGATGTGCAGCCCCAGCGACACCCTGAAG…
CL2939.Contig2_All	MN125960	GATCGGGCTTGACATGGACGCGCTACTGTTTTTCTCAAGCATTCTGTACTCGCTCCCTCTGCGTCGCTTGCCTTGTGCGCTTGCTTATCCTGCTTTCCCTCGCCTTTCTTTCTTAATTCCTCCATCATCATGGCGTTCGAGGCTCACCTCTCCCAGGCTCTCCTGTTGAAGAAGGTTGTGGACGCCATGAAGGACCTCTGTAAAGAGGTGAACTTTGACTGCAGCGAGACGGGCATGCAGGTGCAGGCCATGGACAGCTCGCACGTGGCCTTGGTCTCCTTGCTCCTGCGAGAGTCTGCCTTCTCGGAGTTCAAGTGCGAGCGCCCGGTCTCCCTGGGCATGAACGTGGAGTCCCTCTCCAAGGTCCTGAAGATGTGCAGCCCCAGCGACACCCTGAAG…
CL2939.Contig3_All	MN125961	CTCAAGCTCACCCTGTTTCCATAATTTGGACACCCTCGCCCGAATCGCTTGTCTCCCTTCCTCCCTCATCATGGCGTTTGAGGCTCACCTCTCCCAGGCTCTCCTGTTGAAGAAGGTTGTGGACGCCATGAAGGACCTCTGTAAAGAGGTGAACTTTGACTGCAGCGAGACGGGCATGCAGGTGCAGGCCATGGACAGCTCGCACGTGGCCTTGGTCTCCTTGCTCCTGCGAGAGTCTGCCTTCTCGGAGTTCAAGTGCGAGCGCCCGGTCTCCCTGGGCATGAACGTGGAGTCCCTCTCCAAGGTCCTGAAGATGTGCAGCCCCAGCGACACCCTGAAGTTGCGATGCAACGGTGGAGCGGACACTGTGAACTTCCAGTGTGAGGGCAGCGACGACAG…
CL2939.Contig4_All	MN125962	CTCAAGCTCACCCTGTTTCCATAATTTGGACACCCTCGCCCGAATCGCTTGTCTCCCTTCCTCCCTCATCATGGCGTTTGAGGCTCACCTCTCCCAGGCTCTCCTGTTGAAGAAGGTTGTGGACGCCATGAAGGACCTCTGTAAAGAGGTGAACTTTGACTGCAGCGAGACGGGCATGCAGGTGCAGGCCATGGACAGCTCGCACGTGGCCTTGGTCTCCTTGCTCCTGCGAGAGTCTGCCTTCTCGGAGTTCAAGTGCGAGCGCCCGGTCTCCCTGGGCATGAACGTGGAGTCCCTCTCCAAGGTCCTGAAGATGTGCAGCCCCAGCGACACCCTGAAGTTGCGATGCAACGGTGGAGCGGACACTGTGAACTTCCAGTGTGAGGGCAGCGACGACAG…
CL2939.Contig5_All	MN125963	CAAGCCGTTCCGATTCTTCCAACAGCCCACTGCCAACAGTCGAGGGACTCGTTCTTTCTACCCTCCTCCATCATCATGGCGTTCGAGGCTCACCTCTCCCAGGCTCTCCTGTTGAAGAAGGTTGTGGACGCCATGAAGGACCTCTGTAAAGAGGTGAACTTTGACTGCAGCGAGACGGGCATGCAGGTGCAGGCCATGGACAGCTCGCACGTGGCCTTGGTCTCCTTGCTCCTGCGAGAGTCTGCCTTCTCGGAGTTCAAGTGCGAGCGCCCGGTCTCCCTGGGCATGAACGTGGAGTCCCTCTCCAAGGTCCTGAAGATGTGCAGCCCCAGCGACACCCTGAAGTTGCGATGCAACGGTGGAGCGGACACTGTGAACTTCCAGTGTGAGGGCAGCGAC…
CL2939.Contig6_All	MN125964	CAAGCCGTTCCGATTCTTCCAACAGCCCACTGCCAACAGTCGAGGGACTCGTTCTTTCTACCCTCCTCCATCATCATGGCGTTCGAGGCTCACCTCTCCCAGGCTCTCCTGTTGAAGAAGGTTGTGGACGCCATGAAGGACCTCTGTAAAGAGGTGAACTTTGACTGCAGCGAGACGGGCATGCAGGTGCAGGCCATGGACAGCTCGCACGTGGCCTTGGTCTCCTTGCTCCTGCGAGAGTCTGCCTTCTCGGAGTTCAAGTGCGAGCGCCCGGTCTCCCTGGGCATGAACGTGGAGTCCCTCTCCAAGGTCCTGAAGATGTGCAGCCCCAGCGACACCCTGAAGTTGCGATGCAACGGTGGAGCGGACACTGTGAACTTCCAGTGTGAGGGCAGCGAC…
CL4680.Contig1_All	MN125965	AAGTCGGGGTTGTTGTAAGAGTCTTACGGAGTCTGTGTTTTTCATGGGGTCTTGCATGTTTGCAAGCAGGGGGAAACTACACAGTGTCGCACAGACTTCCTTTCTCTACGCATTTTTCGAGAACCTCGGTTGTTGGCCTGTCTGAAGATCCAACAAACCAACCCTCTTACTCTCTCTCTACATTTACAAGTACATACACACATATATAAACACATACTGACCAAAAAAAGAGAGCAGACCTTCCCCGCCGCCGCTCTCTGGCAGCGCTCTCAAACGATCAAACAGATCAAGTGAAAAGATATCTTCAACACCGCCGCTCTCTGGCAGCCAACGTCGGCGACCTCTCACGGCAATGCCTCCCAAAAAGGCGGCCGCCACCAAGAAGAAGGCAGCCGCGCC…
CL4680.Contig2_All	MN125966	CTTGTGTGCGCCTATATGTGTGCGCACATGCTGCATCGCCAAAAGTCGTCAAGGAATTTGCTGACTGCATCGATGGTCTCAAAAATGAAGACCAGGGACCGCTTCGATCACTTTTTTCTGGATTCGAACATCATGCATTTGTTCGTCCAGGAAAACTACTTGAACTCGGTTAGCAAGAAACCCATTGATGACGATTTGCTCGAGAGGTGCGCGTCCTCCGCCTCCTCAATGGCCCAGGGGGACTTGGTGAACGAGAGGGTACGCAACAACCAGGACTGGAGCCTGCTACCCGACATGGGCACGCTCTCCACGGTCTACCCATCCTTTTTGACCAACGGCTTCGTGTCGTTCCCGGACTTCCCGAAGTTTTTGGGAAACTACTCGAAGATGGGGCGAGCG…
CL4680.Contig3_All	MN125967	CACCGCCTCCACCGCCTCCACCGCGAAGCGAACTCCATATAGCCGCTAGCCATCGACTCGGCATCACTTCAGCATCGATCCACCGTTTCAGCCCGCGAGCTCTCATGGCTGCACCAGCGGGGGGAGCCTGGCAGCCCGTTTGTCCGCAGGGGCGGCGCGCCCCTTCATCGCGGTGCCTGACTTTCAGAGCTGCCAAGGGGTCTACTCAATCTTTGGTCAGCTTGATCAACGAGTTTTCGCCGAATCTGACCCCTGAAGAGGTGCTAAAATCTGGCTCATTTGGTGGGACCTATTTTCGCGATATTTACTCTTCAGTGACCTTGAAGCACCACAAGGATGCTTGGAAGGAATTGCCGAAAGCCTGGATTTCCGGTCTCGATATCGAAAAGGAGGTGGCAA…
CL5100.Contig1_All	MN125968	GGTGTACAAGTGCTCGGGGTGTGTCCCAAGAAAAAGGGGAGGTAACATCTCGCCTTTCGAGGATGCGCTCTCAAAAATTGATGAACGGATCAGTGAGTGATTGTCCGAGTTCACTCATAAGGTCCAATGTCCTCCGCCTATTTTTTGGAGGTTTTCGCGGTGGCCGGTCTCTTCTTGGGCCCTCCGCTCTGGGCTGCGGCGGGCCTCTTCCTGGAAGTGCTGGATGTTGACTGACTCCCTTTGGCCTTGCTTGCCTTGTTCGCTTGCTTGGACGACTTCTTTCCATACTTTGTCCTCATTTCATCCACCATCGCAACGTAGGCTTTCATGTCGAACTTGGACCGGATGCCATTGTAGCCCATGTAGCGGACCATGCCGAAGCGAGGATTTTTCTGCCAA…
CL5342.Contig1_All	MN125969	GGCCTTTCTTCTATTATAACACACTCTTTGCTGCCCGCCGTCATGGCGCTCTTCGGTGGTCTCTCAGCGTCATCGCCCTGGAGGAAGCAAGCCACCACTCTTCTCATCCGCGAGGACGCGGCCGCCAAGGCGATTCGATCTTCCAAGATCGCTGGCTTTGACCTCAACGATACCCTGGTGAGCAGCAAGATCGGGGCTCCGGGCTACCAGGTCACCGTAGCTGATTGGAAGCTGTACTCAGAGGATGTTGTGACGAGGCTAAGGCAGCTGCACGAGGAGCAGTACAAGCTCGTCATCTTCACCAACCAGGGCAACATCAGAACTGCCCTGGATGGCAAGCGTGCTGTCGCTGTAAAGGCCTACATAGATGAATTCCTCAAGGCAGTGGGCGTCCCGATC…
CL5342.Contig2_All	MN125970	GGCAGGCAGCGCAAGGCGAGACTGCACAAGTCCAGCACCAACTTCCCTCGCACCGCCCTCCAACACAGAAAATCACCCTCATCATCGACTACCCTCCTGGCCTTTCTTCTATTATAACACACTCTTTGCTGCCCGCCGTCATGGCGCTCTTCGGTGGTCTCTCAGCGTCATCGCCCTGGAGGAAGCAAGCCACCACTCTTCTCATCCGCGAGGACGCGGCCGCCAAGGCGATTCGATCTTCCAAGATCGCTGGCTTTGACCTCAACGATACCCTGGTGAGCAGCAAGATCGGGGCTCCGGGCTACCAGGTCACCGTAGCTGATTGGAAGCTGTACTCAGAGGATGTTGTGACGAGGCTAAGGCAGCTGCACGAGGAGCAGTACAAGCTCGTCATCTTCA…
CL5342.Contig3_All	MN125971	CTTCGTCAGCATCGCCATGCTTACAGGGCTGAGTCCAAACCCCGATCTGCTCTGCCACTGAACGCATGGCGACCGAGAAAAATAGCCAAAAACACAGATGGCATGAACAGCCAGAGTGGGAAAAGCCAATGGTGTTGCATGTGTCTGGCGATTCGCCCCCAAAACCAGAACTGTCTTCAATCCCCAGAGAGTCTGTCTGCCAGAAGCTCATTTGCAGCGACTTCCGCATTGCCTTTTGCGGCCTTGAGTCGCGCTTTGCACATCTCTTCTGAGAAGCCCAAGGCCGCCAACATTGCTACCTTGTCGTCAAAGCTAGGAGCCTTATGCCCTCCACCATGTCCCTCACTTGCTCCTCCTCCTCCTCCTCCTGCAGCGGCAGAGGCAGCCTCGGCTGCCGCT…
CL6843.Contig1_All	MN125972	CACTGCGGTACGTCAATGAGCACATCGCTCACTAGTCAGACAATTCGATGATGGCAGAAGGTGTCGGCGTGCACATTCCTCCAGTGGCGAACGTCGAGCCCCAACGGCGTTTCCGACTGCTCTTGTGGATGCCGTGATCGGCATCCCAACTGCTGCTACTGCAGCAGCTGTCTGGGCTATGGGTATCAGCCGCAGTGGTGCTGTTGCCACTTCCACTGTTGGCATGATTTCTGCCCAAGCTGGCGTGTGCTGCTCCGTTCTGTGCTGCGCTCCTTCCTTGGCCACTCTTCTGCTTGAAGAAGCTTGGAATGGTGCCTGTGCCTGAGCAGTCATGGCATTTGCCTTTGCCTTCGCCTTTGCCTTTGCCCTTTCCGTTCGCGAAGCTCTGAGAGTCGCGAG…
CL6927.Contig1_All	MN125973	CAGGGAGCTGGACCGGCGGCAGATCGCGAGATCTGCGCGATCCGGTCCTTCCAGCTGACCAATCGTCGAGTTGCAGGTCGCTTGAGACCCCAGTACAAGGCCATCGACAGTGTCCTCAGGACGACTGCTGAGGATGGCACCAAACCAAGTCTCAGCCACCGATGCGTCGACATGGACGCGCAGGTTCCTGAGCTGATGGGTGTGTCAAAGGCTGTCTTGGAGAACGTCATCTTCTGCCACCAAGAGGACTCTTCGTGGCCCCTGCAGGATTCTTCGACAGTGAAGAAGCGCTTCGACGACATCTTTGGAGCCACTCGCTATACGAAGGCACTCCAAAATATCAAGGAGCTCCAGAAGGAATGGTTGAAGACCACGAGGGATCGAAAGGCAGATGCTGAC…
CL6927.Contig2_All	MN125974	ATGCCGGAAGCTGCAGATGCAGAAGGGCAGGTGATTCGGGAATACGAGAAAGCTCAGGAACAGTTGAAGAAACAGCGCCAGGCAGTTGCTGAAGCTCATCATCGGGTGTCGGGGGCTTCAGCCCGACGTGCGTCGATCGAGGCAGATCTCAGGAAGTTGCGTGCGGACGAACAGAAGTTGGCTCAGGATCTGGGACTGCCGTCTGGGGGTGGACAGCAGAGCTGGGCGTCCTCGAAGCAGGAGTACGTGAACCGCATCAACCAGCAGCGAGAGCAGGTGGAGCTGGCCCGGAAGGACTTGGCGATGACAGAGAGCGCGAAGCACATGTACGAAAAGTTCCGGGAGAAGTCCCGGTCCAAGAACGCGTGCCAGTTCTGCCGCCGATCCTTCAGGGCCGAT…
CL7093.Contig1_All	MN125975	CGGGCTGCGGACAGCGGCTGCGGACAGCGATCCCAGAGTTCCTGAAATGGCCGTCCAAGGCGAGCGGGTAGGCCCGAATCAGCTGGGCCTGTGGCCCTGATGCGAAGAGGTGTCTAGTTAAGGATCGAGACCAGGACCAGGACCAGGACCAGTCCCAGGGCCTTGCTTCTGACGTTTCGCGGGGTTTTCTGCGCCAAAACCGAGGGCGTCCAGCGGCGAAGGTGTCTGCCCTGGCGTGGCCGACAGCTGATGGGACTGGGGCAATCCGGCCAGCACCGCAGGCGTCTTCTCCGGGGTCTCCAGCTCGGGTCTCTTGCGGTCACCGGCTCCTAGCGGATCGTCGTCCTGCTCAGGGGTGTCCTGATCGTCAATTACCCCACTGTCACCGGTTAGTGCTTC…
CL7093.Contig2_All	MN125976	CGGCCAACGACGAAGGTCCCCAACATCGCCAAGAACGGCTGGCTGTTCTGCGGCGAAGCGACTCTCGACCTCACCCCATGGAGAGTCTGCTTCGTCGCCATCACACCCAGGACAGAACAAGACACACACACACACACACAGCAACAGAGAAGAGAAGAACGACAGAAAGAGAGAACGAGAAGAGGAATCAAGGAGACGAACATTGCAGAAGATTGCAGATGGGAGGAGGCCAGAGAGAGCCACCATCTCACCACAAACTCTTCTCGTCTCTCCTCGACGCCTCCCCTCAACATCGCAGAAGTCATCGAAGAAGCAGCAGCAAGCTCAATTCAATCGGGAAGGCAAATCGCTTTGAGCGATGCCTCACTAGAAGAGGGTTGCTGCTGAGGCTGCTGCTGG…
CL7093.Contig3_All	MN125977	TGCGTGTGTGAGCGGGTCAACAGCTTGGCAGGGCTGGGCTGTGGCAGGAGCCTTGACAGACTGCGCCCCGATTCGCGGCTGCCTCAACTATGCAAAGTGGTGTAAAAAAAATCGATGCAAACCATTTCGAGTGTCCAGAGAAGAGGTTCTCTGAGCCCGTAATGACGGGCAATATGCGCCAATGGCAGCCCGCTAAGGCAGGTCAGCGCAGCAGGGATGGGGAGGATGGGGAAGACAGGGAGGATGGAGACGAGGATGAGGGTGTGGAGACTTTTTTCTGACGAATACAGCCCCGGCTTCCTGGGCCAAAGTTTCCGGCCGACAGAAGCGAAACCTTCAGGAGTGGGCGGCAGGGAAGCAGGCTTCCCAGCCACCTCCTGGAGAGGTGAGGGGGGGACG…
CL7240.Contig3_All	MN125978	CGGCAAGTCGCCAGGTGGTGGTGGCCGAAGTCCTCAAGCCGGCATCGACCAATTGTTTCTGAACATTCCCACGATGACAGAACGGGTTAAGGCCCTCAACGAGATGGTGGAGAGACAGGGAGCAAAGATTGTTTCCAACGTCGTTGGGGGCGCCGTGCGCGCGAGACTGACGACGGACTCGGGCCACGAGCTCCCCTTGACCTTCTTCGAAGACGGCGTAAAGCTGGGCGAGCTCCCCTTCTCAGGGTATCCTTCAAGAGAAGCTCAACTGCTTCTCAGGGACATCTACGACGGCTACTTCCCCTACGCTCTGAAGGACAGCTACCCGGACGGCGTCGCGATGCGCGTCGTGGACCGGATGCACCTTCCGCACGCGAAGTGGGCAGCGGAGCGAGCGGC…
CL7855.Contig3_All	MN125979	GGTTAATGTTGGCTCGAGCTGTCTTTGCTCTTGTCCTCGTCTCACATTCGTGCTCATTCGTCCGGCCTGAGAGAGAGCCTGCCTCCGGGGTCTTTTTGACATAGGCAGTGCTTTTGGAGCAGGCTTTCTCTGTGTTCCTTGTGTGGTTTGGTGTTTCACTTGTTCGTTTCGGGTAACTTCCGCTGCCAAAGGAAGTCTGTCTGTTCCCTTTATAAACAATCCGCTCCTCTTCACCCAAAGACTCTTTTTGTCCAGCGCAAAAGCGAGTTCGAAATGGAGGACATCAGCGAGGGCCCAACCTCATCTCTCCTCGCTTCCTCGAGCGCTGTGAGCGAAGGCCAGGGGGAGGGCGATGCCCAAGCTTCGCTTCTCCTCATCTCTTGGAACGTCGCCGGCTGG…
Unigene349_All	MN125980	GTGATAGACAACCTGCAACGCCCGCGCCGGCGACTCCACCATACTAGTGCTTTGTCTGCAACCCTCTTGAAAGGCTGCGAGGAAAGCAGGGTGAGAGCCAGTGGGAGAGAGTATTTACACCTGGGCCGGGCTGGTCTACACATGTTCCAGCACCACCACCAACACTGCTTCAGCACCAGCGACACCGGGACAATCGATCAATGCATGTTTGCGTGCCACAGCTAAGAGAGGAAAAACGAGGCGAGGCGAGGACGAGGGAGAGGAAGTGGCAGGGGGCGAGGGGCGAGGGGCGAGGGGGAGAAGAGACGAGCTTTCAGAACCGACTTGGCACTCGATAACTCGACTGTGCCTGTGCCCCCCTCAGAGCCCCTCGCGCGCTGGCGCTGACCCCGCCCTCGA…
Unigene678_All	MN125981	TGTTGCTGCTGCTGCTGTTGTTGAAAGAAGGATCGCTTGAGGGCGGCTGTCGGTTGCATCGGGGTGGCGGACATCGCGACGGCCGAGCGGGAGCCTCCGCTTCCTACAGACGCCTCCAGCTTTTCTTTGTTTCTTTCTGTTCCCTTCGCCGAGGCCGAGGCCGCTCCGAAGAACTTCGAGAGCGGCGCGTTGGCCTCGGGCCCCGCGAAGACGGGGCGGAAGTTCGAGAGCGAGAGGCCAAGCATGGTGATGTTGAAAGAGCCTGTTGTGGGCGCCCAGCGTTGGAAGCAGAGCAAGGCTGCTCGCGCGATCTGGTCGATGGTGCCATTGCGCCCGAGATCCAGAGAGGTTTGCCGCGTCGCGTGCTGGTGCGACTGCGAGTCGAAGCCGCCGCAAGCC…
Unigene1664_All	MN125982	AGCAACAACAACAGCAGCAGCCTCCCCCTCCTTATCATCGTCATCATCACCCAGCGCCACCCTCTCCGCCGTCTTGTCAACGACGGCTCAGCAGCAGCAGCTGGGCTCCGGCTTCCACGCCCGCCTCTACGGGACCCTGGTCTCCATGGCCCGAGGGCGCGCGGGCGGCTTGAAAGCAGAGATTTTGGAGCAGCCCTTGGTAAATTTTGTGCCCGAGGTCGCCCAGTCCTTGGGCCCAAGCTCCTCCGAGAGATTTTCGGAGAACGTTGTGCGCCTCCAGATGTTGGGCTCTGCGCTGGCGGCCGCCGAGGCGACCAGCACAGCGACAGAGGGCTCAAAGTCCACACCAGGGGGCAGTGCCATGGACCGCCTGGCCAGGGCCTGGTGCCGAGCGCTCCA…
Unigene1702_All	MN125983	CTGGGTCCTGGCTGCCGTCGCTGCGGCCAGCCCCTCGGAACCTGGAGTTGCCGCTGCTTCTTCGTGAGCCTCCTCCTCCTTCTTCCCCTCCTCCTCCTCCTCTGTTTTCAGTGTTTTCTCCTCCTCTGTTTTCTCTTGCTTCTCCTCCTTGCTCTGCACCTGGTTCTCCTCCCCCTCCTTCTGCTCCTGTCCCTCGTTCCCCTCCTCAGCGACCTGTCCATCTGCCAGAGGCAACGCCTCCGGTGCGGTGAGTGCCGGTGTGGTCTGGCGTCGCTTCAGCTCATAGGCCTGCTCAACCTGTGTGGAGTCATAGGCCTCAGACGTCAGCCTCGAGAGCGCCGTCGCGACCTTTTCCTCCACCTTGAGCTGCGCCCGCTCGACTCGCTGTAGCACCATTAA…
Unigene1912_All	MN125984	CTCGACGACTTGAGAGGTGGAAATATTGCGAGGCTCTGGCCGAAACATTCGACCTCATCGGCCAAATCCCAACCGATCGTTTCCATGATCCCCCCAAGTCTGGCCTAGTTGTTCCTTGTTCACTCGGGCCTGGTCGCCGGCTAACTCGCGATTGCTTCCATCATCCTCCCCCCATCTTTGCATTACTTTGATTGTCCCACAAATTGTCACAACAACAATCATTATCGTCACGTTTATTTGAACCATTTTGTTGTAAGTCAACGGCGCAAGTCAGAATTTTCAGATGCCGCTTCGTGGCATCGCCGAGGCACCTCTCGAGGCTCTGTTTGGGGAAGACAACGAGGCGATCTGCGGGGCTTTGCGTGCAAGGAAAGTCCAGTCGGTGAAGGAACTTGCCTA…
Unigene1971_All	MN125985	CTACTACTACTACTACTACTACTTCTACTACTACTACTACTACTACTCGGACGACTGCGACCGGTTCAATCCGTCTTTCGCTTCTTCGCCTCGGGGAAAGTCAAAACGGACTTTGTTGCACCCGGATATCTCTTCACGAAGTTTGGGATGTTGAACTTCCTCTTGCAGCCGGCATAGTTCATGAAACGAATCTTCCCGAAAATCGGTCGCTCCGTCCAGCCCATGTCATGAATGCCGCAGATGCTCCACATGCACCCGACATAGCCGTTCGGATCTCGTCCGTCCAGCTCGTAGCGGTCGTTGAGCCGGATGGCCTCGGCCAACGCTTCTGCCGGTGTCGGCATCCATTCCAAAATCTTCTTTGCCCAATACATCCGCAAAAACCCGTGCATTTTCCCT…
Unigene1977_All	MN125986	GGCGAAGGCAGCAGCAGCTGCAGCGAAGGCAGAGCCCTCAGCTCCACCCGGCGGAAAGGCAGGGAAGAAGTTGGGCCGCTCCTCGTCAGCACCGACGGCGGCCACGGCATCCTCCAATGTCGACCTGCTGCCCTCGCCATGCAGAGCTAGCAGCCGCGAAGCGGGCCTGGGCGAGGAGCCTCCTCTTCGACTGCCTTCCAGGATTCCTCCGAGAAGCAAGCTGAAGCTCCTCTTGGATCACCGGGAGGTGGGTGCAGGTCGCGAGCACGCAGCCAGAGGTGCGATGCTGGCGGACCTCAAGAAGAAGCTCGGCGAGGAGGCTGTGGAGGGCCGCTCGCTCCCTCTCGGCGACGTACTCTGGGTTTGGCAGCCCGAGACTCCACACTGCTGGCCAGAAAG…
Unigene4585_All	MN125987	TGGAGTTCATGATGCGACCCAGACGAGCAAAGTCAAAATTGATCTTCTTGGCCTCCGCTCGGTCCAAGAGGTAGGGGATATCGAACTGCGCGATGTTGTAGCCCGTGATGATGTCGGGGTCAATGATCTCGAAGAAGTTTCTGAAGCTCATCAAGAGGTCCTCCTCCTTCTCGAAGGCGAAGACCTCGGCTCCCGCGACCTCACTACAAGTGTTCAAGTTCCAGATGGCCTGCACCAATCGCTCCTCTTTGCCTTGCTCCTTGACATAGACCGCGATCTGGATGACGGGGCTCGTGTCTGGCCGGGGGAAGCCCTTGCCCGGATTGTAACACTCAATGTCAAAGGAGAGAATTCGGATCGGCGCGATCTGCAACATGTCGACAGCGGTCTTGCTGACCT…
Unigene5006_All	MN125988	GGCTCTCACAGCCTTATCACTTGATTGATTTGTGGGCGTTTCGTGCGTCCCCACGCTTGTGTTGGTGCCATTGGTTTCATTCTTCGTTATCCATCCAGCCATCCAACTAGTACATAACTTCTGTATCCATTCAGACTAGGGAGGAGCATGTCGTTTGAATTCCTGAAGTCCGAGTGGGGTATCGAATTGAAGCCCAATGGGCAGACGGAGATCCAAAGCTACGCAGAGTCGACGAGCCAGAAGCACGTGAAGGAGTACATCAAGGATTCGGATATCCGCAAGTTGGGTGTGATCTCGTCCCTCCCAAAAGACCTGGCAAGATCTGCCCCCAGCTCCATATCCCCTGGCAAGTACCTGGTGCAGGTCATCAAGATTGTGGACATCACGCAGCCTGCCCGC…
Unigene5075_All	MN125989	GGTGCAAGGTGAGTTCGGCGCTGCCAGCGAAGAGCACGATCGCCGACAGCAGAAACAACAAAAACAAAGACAACAACAACAACAAAAACAACAGCCACGACAAGAAAAACAACAACATTACCAGCCGCAATGCCGTCATCACCCTGTGCCTCCACCTTCAGATTGGGAAGATCATTGTTGAGACGAGGCTCCAACCCCTCAAAGCCTTGCCACGCCAAGCTCCCCAAGTCCATGACGCCTCTCAAGCGGAGACCACGGGCCGCCAAGAGTGGGTCGCCCCAAAAGGAGAACGCCCCCAGCAGGCTCAGTAAGGATTGGCTCCTGCAGTGGCTTAAGGCCAGGCCGCGTGCCCTTCGGTCGATCCAGCGCAGCGACGAGTGGCGGTTGAGGACTTACCCG…
Unigene5536_All	MN125990	TTGCAAACGACTACTTTCGGTCTGGAGTCGAGATGGGATCGAGTCAAGACAATAGCAACGGCAATGTGCTTGAAGGCATGACGTTGGAGCAGGATAGGAAACGGACTGGCTCAAGTCGAGCAATGCGCCCTTTCCCATATCTCCCAAATCGACAAATCGGCGTCACAACACCAAACGGTCATTGACTCCGGCAGGGGTATCCGCGGCCAGAGCATCGGCGAGGGACGGGCATGCTGGGCGAAGGCCCATTCACGATGCCCTTTCATCGCTCGTCCGAGATCAGGCATGGTCACCCGCCAGGCAAGCAAACGCTTGACCTGCACTAGACCCATGTCTTGGCGCTGTCCTGTCTTCGCAGCTCACCAGGCTCGTGGCTGGCAGCTCTCGAGTTCCAATGGG…
Unigene7171_All	MN125991	GTCGCCCCTCACGAGGGCGCTGCTGGTTTTGATGTTGAGCGTCCGCATGCCGCCGAGCTTGAAGGTGTCCAGGAAGTGCAGGAGGTAGGGCAAGTGCACCTCGTAAGGTTGGAAGACTGTGCTCAGGACAGCTCCCTGAAGTAGTAGTTGCGCCAATACTGGCACATGCTTCGGCAGCGTCGCCCAGATCTGGACAAAAGCCGTGGCTTCCTGGTTTCCGAAGCCATACACCGTTTCCCAGTCGCTGACCCACCGTATGTCGTGCACGAAGGCGTTCGACATCGGTCCGCCATTTCTCCATCCGCCGAAGAAACCGACCGCATTCTGCTGAAGACCCATCGCGTGCTCGAGGCCGCTGGCGAAGGCCTGAATGAACGAGGCCCGTCCGTGCTCGTCCAG…
Unigene8182_All	MN125992	TTGCCCTTGCCCTTGCCCTTGGCGCCGCCAGCTCCTCTGCCTCTGCCTCTGCCTCGGCGCCTGGCTGCTGCTGCCGCTTTCGACGGAGGGGGGCCTTCCAGAGCCATCGCCAGCTCCGAAGGCAGACTGTCCTGCTGAAGCAGGTCATCCAGAGCTGCCAGCGCACCCTTCGGATTTTGGCGGTGCAACCGGCAAGCCACATTCAGAGCTCCACGGACACCGACCTTGTTGACTCCAGAGTCGTAGTCTGAGCCCATGAGGGCAGCGGTCGCGACAAGGACCTCTCGCGTGACTCCGCAGGAGCTTTCCATGGCCGACAACTCCCAGACCTCCACCGTCGACGCCGAGCTCTCGGCCTGCAAGTCCAGGCCCTTAAGCACCACTGGAGCCCCGAAGAGA…
Unigene8568_All	MN125993	CCACCACCAGCACCAGCACCAGCAGCATCAGCGTCGCCGATGTCAACTGCAGCAACTGCAGCGACTGCAGCAACCGCAACAGCATCTACAGCACATGCTCGCTACCCTGTCTCACCAAGCACAACTGCCGCCAAACCGTCAGTCACAGACTTTGGAGGCTTCGCTGACCCTATACCTGATCCATGTTCAGGGCAGTCGCAGCCGCCTCAGACGGCCTCGACCCATCCCTCTTTCTCATCAAGCAGCTCCTCCTCCTCTTCTGCTCCTGCAGCTGGCTCCACTAGATCCTCTCATGCTGGTATTGTGGCGGCAGCACTGGCTGCCACTCCTGCTGCACCATCGAACTTCGCATCCAGGAAGTCTGGCATTGAGAACCCCGCAGCCAAAGAGGTATGGTGC…
Unigene8950_All	MN125994	TGTGTATTTGCACGCTTTTTCGCCAGAACCATTTTTCTCTTTTGTTCAGCAACACCGAATCTTGCGTTCACCACTCATAGCGCGCACCCAAAATATGGCTCCCTTCGACTCAGAGGTCCAGTCGGGAGCGATCTGCGCCATTGTGGCATCCCCCTTGACCACAGCCGAGCGCACGTACGGACTCGCCGTGTTCGACGAAGATCGAAGATGCTTCCAGATCTGCGAATACATCGAAGATGCCCATGCCTCCAGGAGCGAGGCGCTACTGCTTCAGCTCATGCCCCGCTCGCTCGTCGCGTCCATCACGGACACGGAGGGCTACAAGCGACTAGGCCGCGTGGCAGAGTCCTGTGGAGTGCCGCTCTCCGCAGTTCGAGCCGTCGAGGCTTCGAAGCAGGT…
Unigene9060_All	MN125995	TTCCTCTTCTTGTAAGTATCTGAGTGTCTCTGCAGTGTCACTTGCTTGCATCGTCGTTTTGAACATCTGTAGATTGAGAATCAATCTGTGACCATCATGTCTTCGAAGAAAGTCGTCTTCAAGGGCCAGGTCTTCGCCTTCTCGGGGAAGCTCATGCAGCCTCGCAAGGAGCTGGAGGAACTCGTCGTCAAGCTCGGCGGCGAGGTCAGCGGCTCGGTCACCGCGTCCGTGACCTTTCTCATCTCCAACGAGGACGACGTGAAGGCCCTCCCGACGAAGGTGGCGACGGCGCAGGGGCGCGGAGTACCGATTGTCTCCGAGGCCTACATCGGGGCCTGCTTTGCCGCGAAGCGGCTGCTGCCGCACGCGAAGTTCGTGGTGAAGGGCTCGGGGCCCGGC…
Unigene9067_All	MN125996	CTGCGTTCTCTTCGCCCTCTGGCTTCTCACCGACTGCCCGAAACAGGCCTCGTTTTGCCGGCAACTTGGTTGGTCCTGCCAGTTATGGATCGGTTCATCATTCGAAAGTCGAAGTCGTCCTTGTCGAACAATGGCAGCTTGGATGAAGGCGCAAGTCAGCCCAGCAGCGCGAACTCTGTCAGCGCCACGAGCGGCAATGGCAGCACCAGCGCCACCAGCTCCGACAGCGCCTGTGGCACCGGGTCTAACTCCCTTTTCCTCCCAGCCGCCAAGCGGCCGCGATCCTCGGCAATTCATGAAGGAGGCGATCCCAGAACCATCATTTCTTGGAATGTCAACGGATTGACCTCGCAGTTGAAGAAGACCTGGAGCGAGATTGAAGCCTTTTTGAAGAAGGAA…
Unigene13204_All	MN125997	CTCGAACAAAAATCGCAGGGAGGGAAAGTACTTTTCGACAGTGGTCCTGTCTTCGTCTCGCAGGGCCTTGTTCAATTGTTTGTAGATGGCGTTGGATGTGTACAAGAGGATGGATCCGTACAAATCGGGGGTCATTGGCTTCTGCGGTTTTCCAGCCTTCTTCTTGTGCATGGTTGTGCCTTTCGTGACACAGCTCTTGATGTCCTTCACACTGCACACCATGTGCGCCGACTCGTGCAAAGTCGCAGGTACAGGAAGCTCCATGACTCCTTGGATTGGTGTGAGCTTTTCTTCCTCCTCCCCGCCCATCTCTTCGAAGCCCATTCGGAGGTAGAACTGGAGCAAAGCCTTCTCCGCTCCCAACAACTCGGTGTTGTTGATCACAGGTGGTTTCTTCGC…
Unigene13287_All	MN125998	CTCGCCCCCCCGAGTCCGCTGGGTGCCACAAACAACTAACGACGCGCGCGCGCTCCCGCCGTGTAGTTGTTGCTGTTTGCGTGCTATATACATTCGCTTAGTTACTAACATACTCTGCTAGCTTGCAGCTTTCCCTTTTCCCTCGCTCAGTCTTCCTCGCGCAATCTGAGCAAAGCCTCTTCTCTCCTTCCTTACAAACATCTGATCCTGCCCATTGAACATGGCTCACATGATCGTTACGGAGGAAGCTCTCACCCAGACGCAGAATGTTGACGTCTCCCTGCTGCCCAAGCCGGCCGCGGACAACTCCGTGCATGCCACCATGAGGTGCCTCGCCGGCAGCGTCGAGTCGTACGAGATTCGCCGTGACAAGAAGTCGATCGAAATCGGCCGACACCC…
Unigene13507_All	MN125999	GCAGCAGCAGCAGCAACAGCCGCAATTCCAGCAGCAGCAACAACAACCGCAATACATGCAGCAGTCGGGCATGCAACGCCAGGCCCCAAGCCCCATGAAGCCGGAGCGAGGTACACCCTCCCGCGCTCCGTCGGGCATCATCGATATTGCTGGTTTGAGTCCATACAACGGCAAGCGCTGGATGATCAAGGGTCGGATAGTGACGAAGTCGGATGTCAGAACTTTTAATTCTGCCCGGGGCCCGGGGCAGCTGTTCAAGATCGACATCACTGATGGACCAGGAAGCGAGATAGCAGCTACATTTTTCGGGGGGGCTGTGGACCAGTTCTACGACTTTTTGAAGCTGCATCAGGTTTATACCTTCGCCGGCGGCTCCGTGAAAGCTGGAAATCCAAAGTG…
Unigene13700_All	MN126000	CTCCTCCTCCTCCTCGAGCTCCACGAGCACCGGAAGCGCTGGAGCCTCCCGGACCACCAAGGCCAGAGAATCCGCCTCCAGAGAACAATTCCTCGGAGGCTCCAGGCGGCAAGGGCTCCTGCTTCATCGCGGAAGCGGGAGGGCTTGTTGCTGCAGCTGTTCCTGCTCCTACTCCTGTCATCCCTGCCGCTCCGCCGCCGAGCCCTCCCGCATCAGACCTGCCGCCAGGGTGCAAGCTGTCTGGCGCGCCTGTGCCAGCAAGTCGTTGTCTCCGCAAAGTTTCTGCGCGGTCCTGAATCTGCACACGAATCTCTTCTTCATCGACAGCGCGACTTTCTCGTAAAACCACTGAATTCGTCGCCTCGACAGCGTCACGGACGAATTTTTCGATGGCGCAAG…
Unigene14481_All	MN126001	AGGAGGAGGAGGAGGAGGAGGTGGTGCGACCCAGCCAAATCAGGGCCCGCCACAGCCCGCCGCTGTGCAGACCTTGACCCCGGTGACGATTCGAATGCTCCTGGACTCCTTTCAGCAGCAAAAGACCACCGCCGGAGGCAATGCAGGTGGGCCAGATGCTGCTTTCATGGTCAACGGCCGCGAGCTGGGCATGCTGACGCTGGTGGCCTCCGTGGAGAGCGTGAAGGTGCAGCCAACTTTCAGGATCTTCGATTTAAACGACAGCACTGGGAGAATAGAGGTGCGAATCTACAGGGACAGTCAAGAAGTCGATGGTGAAGACGACCTAAAAGTCGGCGAATACGTCCGAATCTACGGCCATTGCCGGGCCTGGGGTGGCCAGGAGCAAGTTAGCTGTCA…
Unigene15380_All	MN126002	TGACCGGTGGGCACAAGGAAGCCTCCTCCAGCTTCAACCACTTGAACAGCGACACGTCTCAACTCTCCCACGATACGGGCAGACAAGAAGACCTCGTAACCTAGAAGAAAGGGTCGAAGTTTCGCTCGTGAGAGGGCATCGCTTAAGAACATCCCAGACTTTTCCTCTGCTGCCTTGTCCTTCAGTTCGTATCCCTCAACCGGAAGCAAGCGCTTGGCTTCGAGACTCCTGACCAACCATTCGTTCGTCAGGACAGAGATGCCCCGACAGATAGCACACATCAGGGTCTCCGTTCGTCGCAGGCTGGTCGCGACGACGAAGTCGGTGTCGACAGCCACTGTTCGAACGAGTCGGACGTTCAGTGCCGAGAGGGACGCCTGGTCCTTCACAGAGAGGCTC…
Unigene16314_All	MN126003	TGGCCGCAGCAGAAGCGAAACTCATCGCAAGCCTCTTGAGCTTGGATGCGAAGCAGCCGGAGTGCAACAGCATGTTGGGATCCTCTGTGTCACTGAGCAGCCCCCCGGGGCTTGTGAGTGGAGCTCCTGCCACCGCCACTCAGCCCATGCCGGTGCCTGGACCTCCACAGTGCCAGGGCGAGCAGGAACCTGTTCCGGAGGCTTTACAGGGCTTGACCGAGAGTCAGTTGCAGGCAGCAACATTTCCCATGGACCGGTCCCTGCTTGTGATCGCTTGCGCAGGTAGCGGCAAGACAAAGACGTTGGTAGCGCGAGCTACTTGGCTCCTGCGCAGCAAGGCAGTCTCGGCCGCGAGCCGACTCCTGCTTCTCTCCTTCAGCCGATCCGCCTGCGGCGAGC…
Unigene17412_All	MN126004	AGGCAGAGGAGGGGATGCACGGGGCAGATTCGGGAGAGGAGGACCAGGAGATGGAGCTGGAGGCGGCTGACGATGAGAGGATGGAGATGGAGGAGAGGCAGAATCGCGACCAGGACCAAGACATGCTGGATGATGATGCTCTGGAAGACGACGACGCCGACGACAATGACGAAGAGGATGATGACGGAGAGCAGCGGTCCTCTGCCTCTCAGGCTCGGTGGTTGGACCCTCAGGTCTCCACTCAGGTCTCGTCGTCATCGTCGCAAGCTGCCTTCAAGTCGGCTCTCAATACCAGAGCAGGAGGACCGTCGAGCTTGGAGCACCCTCCAGTTCAGACAAGGTCGGATGAGATCTTTCCATCCGCGAAGCGACAAAGGACAGCTGCTTCAGGACGTGGAG…
Unigene17453_All	MN126005	ACGAGACCGATCCTGAGGAGAGGGGTCCTCCGAGCGGGGAGGACGACAACGACAGCGAGAACGACAACGACAACGGCGACAGCAGCCAGAAGGAAGTCTTGAAGCTCCGAAGCGCGAACGTCCTGCGACTGGAAGATCTCATGAGCGCCTGCCGGCACCTGTTGGAGAAGGACTTCGCGGAGAGCGAGTGGGAGCACTTCGCGGGCCTCTGCGGCCGCTCCCGCTCCCCTGTGGTCTTGCAGCGATGGTTCGAGAAGTTGGTGAAGGAATGCAGTATGGTGGACTCCTTCGTGGAGGCCTACCCAGAAGCAAGAGAGCGCTTCACAGTCTGGGACCAACATCAGAACACCCGCTTCGTGAATATTGGGTCCAGGATAGACTACCTCCTCGTCTCCGCGC…
Unigene18126_All	MN126006	ACGACGGCGACGGCGACGGTGACGAAGGCCGCTGGATTGACGGCATGGATCCGCTCTACTCGTCTGGCTATCCTATCTCTCCAACCAGCTCGCACCTCGTCGAAATCGAATCCATGGCCTCGGTGGTCTTGGTCGTGGAGAAGGAAACCATCTTTCACCGCTTGGTTGCGAACAAGATCTTGGAACGGCACGCACCACTCATCCTCATCACTGGGCGCGGCTTCCCAGATCACGCGACGCGCTACTTCTTGAAGCGGATCCAGGAGACCCTGCATCCCAAAATCTTCCTGTTGACAGACTTCAACGGAGCCGGCTTAACCATTGCAGCCACCTACGCCTTTGGCACTTCCTCCTCTTCGTCTTCGTCCTCTTCGCTGCCCCTACCTTTCTCCTCACCAC…
Unigene20816_All	MN126007	CTCCACGCTCCAGCATGGAGCTCTCCACATCAAAGGCCGATCGCCTTCCCAGAGGGACTCCTCGTTCGGCATCCCACTTCCGAATTTTTCCGTCCACACCACAAGAGAGTAACACGTTGTGGGGGCCCTTGGCGTCAAGACTGCTTCGCAAAGGTGTCACAACGGCTGTGACCGCTCCACGATGTGCTGAGCTCGCCTCGTGCTGGAACTGGCGGCGGGGAGGGTCGAGGAAGTGTCTTGCCCTTTCAAGTTCTTCGGCGCTAGAGGACTCATCTCGAATATCTTTGGAGAGTTCGGCGAGACACGGCATCTCGGAGGACACTGGGTCCGAGGCCATTCGAGCGGAGCCGGTGCCGAGCCTTCCTATGCTGGCGCTGCAGTTGGTGGTGGCGGACCTGA…
Unigene21225_All	MN126008	GTTTGCACCACTCGTGCATCCCTTGTAAATAGTTGTGCTAGTTCCATGTAATCATTCGTCGATCTTTGAGTATTTCTCCTACTTGGCCTCTTCACCAACACAAACGCGATTTCACTAGGAACCTCCTCCCTTGCCAACCATGGCTTGGAAGGGTAAGGACATCACCATCCTGCTTATCGATGTCGGCGACACAATGTGCCGACAGAAGATGAGTGCGGGCTCTGAATTGGTCTCGAAGGCCGATGTTGCCATGAGTTTAGCCAAGACATTGGCACAGCAAAAGATGCTATTCCTACCAAGGAGCGAGCTCGGCATCGTTTTTTTTGGCACGACGGGCACCGTGAACAACCTCGAGCGTGACGGTTACCAGAATGTCACGGTGGCCTACGACGGGGTGCT…
Unigene21346_All	MN126009	CTTTGCACTTGTCGGATCAAGTTCTTAGTTGAGCCATCCTCGAAACTCAGGCCAATCATTCTTCGGCATCACTTTCGCCAGTCGTTTCGTTTCTTCCCTCTGTGCCATTCCACGCTTACATCTGGTGATTGAGCGACAACACCGATCCCGAAAGGCAACGCACGATGAAGTTGAACATCAAACCTTTGAGTGGGGCGCAGTTCGAGATTGAAATCGACGAGACTGCCAGCGTCGTCCAGCTTAAAGAGAGTATTGCCGCGGCGAACCCGGAATTGGCTGCGGGGAGCTCGAAATTGGTCTGCAATGGAAAAATTTTGGCCGATGCCTCAACGTTGCAGGCAAGCAATGTTGCTGATGGTGGATTGATTGTCGTGATGATGCCCAAGAAAACAGGTGCTG…
Unigene21562_All	MN126010	GCTCATCACTGCAGACCTTTTTATTTCTTGTCTCTTCCGGGCCCCGTCTCATTTTCTAAATATTTTTTCGCATTGGAGCCGACAGCAACAGCATCCTCGGCTTGAAGGCATGTTGCCATATCAGGATCGGATTTTGGATGGCTTCTTGAGGTCCGAGGGGATTCTGACTGTGCTTGGCAAGAGTTTGGGCGTCCAAACATGTTTGCTCGAGGCTGCCCGACGCTTGCTGCGAGACGGCGGAGCTGATGCCAGGAACGCGACAAACCTTATCCTGCTCATCAACACCAGCAATGAGGAATCCCAACTACTCCTTCGAAGGGTCAACGAGGACTATCGATGGGCCTCCTGCAGGGACCGATTCCAGATTCTGGGCCCGGAGTTGTCCGTCGAGGATCGGTC…
Unigene24373_All	MN126011	CGCTGGACTTCGAGATGCTTGCGGGGCTCTCCAAAAGAGCCGTTTGCAGCTTGGTGTCCATGTGACGGAGAAAGGTCTTGTGGGAGGCCGAATCTCCTTCCTTCACTTCTCCCACCCTCTGAACAGCAGCGGTACCAGCATCAGCACTGGCACTAGCAGCAGCAGTCGGACTTCTTTGCTGCTTCGACGGCAACAGCCTCAGGCTGTCGACTCGCTCCAGCTGCTGCCGCCAGGCTCGCAATTCGGATTCGAAGATGGAGGGTTGCTCTCGACAACTCCACTAGGCCCCTCCAGCCATGCCTCGCCTCCCGAGGAGCGGAGGCCCGGTCCAAGAGGCGCTGCCATCTCAGAGGCTCTGCTCTCGGACCCGAGGCTGGCGCTCTCCTTCCACGGTGCGAA…
Unigene24416_All	MN126012	TTCCGACTGAACTTCATGAGGGCCAAATCGACCTCCATAGCGTCCTCCATCTTACCAAGAGCAGCAAGAGCCGTGCTGAGCGGCTTCAAGACAGCTTGCCTCGTCATGTAGTTCGGTGCGATTTCGTCGACCCTTGCAAGGAAAGTGGTCGCCAAACTCCGGTCCAAACCTGTAAGCGGCGGCCCTCTCTGCGTCTGCCCCTCCTCTTCGCACGAGCTCGCGAGGACCGACAAATCAGCCAGGACGTGCAGCTTGAGAAGGTGCTGGTAGGCACGTGTGTAGCTCTCGCGGGCGGCCGGCCCCAAATTTCGAACAGCGAGGGTTTGGGCGTGCTCTAAGCTTGCTCGCAGGACCTCGGGCTCGCGCTTGTGCATGGCGAGAAGGGACTCTCCCAAGCTT…
Unigene29376_All	MN126013	ATTCTCCACTACAACAGCATGCAAGCCAGCGCACTCCCTGCCACCTGCATTCGGTCGGGTTGCTCGATTCGCAACACTGCCACTGTAACTGCAAGGCTGTCTGGCAGCAGCAACACATACGCAATAGACGCGTCCACGCTGCAAGGAGGGAGGCGCCCTCAGCCAAAACAAAAAAAGTTGTGGATGGATGGCATTTTCAGCATGGTCGGTCATTGTTGAGGACAATGGCCGTTGGGTGCAAGTGAAGGGAGCACGTGATCACTCCGCCCCACCTTGCTCTGTGTACAAGTTCTGTGAAGGCCAGCCAGCGTTCGGCCTAGCCGAGCAGTTGCTCGTAATAGTCCAGCATCTGGCCCAGCCAAGGCAGGTCGTGAGGCTCCACGAGAGACCGAAGAACGG…
Unigene29893_All	MN126014	CTCAAGCCGTTGTTGTGCTCCTTGGGCCACCGTGCAGACCATCGTCCACCACCATTGACACATCACCAGCGGCCCCTTCCATCCGCTTCACATTCTTTGGAACTTGCACAGTTGGGGTCTGCATGTTTTGAGACCTCGCGAAACTCTACTACCTTACACTCAGGCTTGTCCTCACGAAACCTTTTCCAAGTCTTAGATGCCTGGTGCGAGTGAACACGAGGTCCGGTCCAGACATCGGACAGAACTGAAGGATGACCAGAAGGCAGAAATAAAGGAGGCCTTCGACCTCTTCGACACAGACGCTACAGGCACGATCGATGCCAAGGAGTTGAAGGTGGCACTCCGGGCTCTGGGCTTTGAGCCGAAGAAGGAGGAATTGAAGAAGTTGGTCTCTGACCT…
Unigene30410_All	MN126015	CTCAAGTTGGATGTGTTGGTGCGTCTGAGGCTCTCGCTCTGCTTTTGACGCTATCCATCGAAGCCATGCCGCTACCGCCATCACTTTGGTCTGAACGCTTCACTCCGCAGAGTGAAGAGGAGTTGGTGGTGTCCAAAAAGAAGGTTGCAGAGGTGAAGGAGTTCCTATGCGGAAGGCTCAGTAGCGCGAACACTCTCATTTTGCGGGGTCCTCCGGGCTCGGGCAAGGCTGCAGTGCTGAAAGCTCTTGCGGCTGACCTCGGAGTGCAGGTGGCGGAATGGCGCCCTATGGCGCGGTCCGAATTGGTCGATGGTGTCTCCCTACCAGAAAGCTTCCTTACCTTCCTCACCCAGGCTGATCGATACTCTCGGCTTCAAACTGTGGGAGACTCGCTGATGT…
Unigene30802_All	MN126016	GGCGGTTATCGACGGCGAGATGCTCGCCTTCGACGAGGGAGAGCAGGTCTTCGTTCCCTTCGGAAGTAATCGGACTGTCGCTCAGGCTGGGGACCCGAACAGACACCTCTGCTTCGTGGCGTTCGACCTTCTCTACTACATGGACGAGGAAGGGCAAGTCTGGGATCTTCGGCGCACGAAGTTCCAGGCTCGTCGCGAGCTCTTGGAGAAGGTGGTCGTGCCCAAGGATCGCTGGCTCGAAGTGGCGCCCTCGATGATCACCACTTCAGCCAGCGAGGTCCAGTCCCGACTCGAGGGCGCCATGGACAACCGCGAGGAGGGCCTCGTCATCAAGGACGTCTCTTCCCGCTACTGGTTCAACGCTCGAAAGAAGGGATGGTACAAGATCAAACCGGAGTA…
Unigene31993_All	MN126017	CAGGGAGCTGGACCGGCGGCAGATCGCGAGATCTGCGCGATCCGGTCCTTCCAGCTGACCAATCGTCGAGTTGCAGGTCGCTTGAGACCCCAGTACAAGGCCATCGACAGTGTCCTCAGGACGACTGCTGAGGATGGCACCAAACCAAGTCTCAGCCACCGATGCGTCGACATGGACGCGCAGGTTCCTGAGCTGATGGGTGTGTCAAAGGCTGTCTTGGAGAACGTCATCTTCTGCCACCAAGAGGACTCTTCGTGGCCCCTGCAGGATTCTTCGACAGTGAAGAAGCGCTTCGACGACATCTTTGGAGCCACTCGCTATACGAAGGCACTCCAAAATATCAAGGAGCTCCAGAAGGAATGGTTGAAGACCACGAGGGATCGAAAGGCAGATGCTGAC…
Unigene32503_All	MN126018	AATTAATCAAAACCCGATACTCCCCTACTCATTGATGGATAGACCTGCCCTGACACGCTCTTGAGGAGTCAGGTCCTTACCAAGATGCCGCCCAAGCAGATCCGAGTTCTGAACGTAGCCGAAAAGCCCTCGGTCGCAAGAGAGATCACGAAGCACCTCGGAGGGGGCCGAGCGCAGAATTTGCGAAGCGGGCCTGGCATTCATCTTGCGGAGTTCCCCTTCACTCTCCGCAACACCGCCGTCACCATGGTAGTCACTGCGATCCGTGGCCATCTGCTTGAGTTGGACTTCCCGGAAGACTACAAACTCTGGAAGTCTCACCCTCCCGGCATCTTATTCGAGGCCCCCATCGTCAAATCCACGAACCAAGATGGGCGCGAGCTCCAACGGATGCTGGAG…
Unigene32515_All	MN126019	AGGCCGAGGCCGAGGCCGAGGAGGCAGGTAGGACCTGGTCGCAAGCAGCGCAGCGCTGCGTCGTGGCGTTCCAATTCGAAACCAGCGAGGACTTGCCCCCCGTGTGGATGCCTGCAGCCGAGGCCGCGAGGACGTCCCGGCGGAGCGGCCGCGGGCCGTCCTGGAGCCAGCGCAGGACGTTGGCGTAGCCCGGCGCCCCATCGGGCGCCCGAACCAGGCCGAAGAGCCGATTCAAGGCTGGGCCGACCTGTCGGCTCAAATAGTACTCGACGTCCACAAAAAGAGGGGCCGACTTCTGTTCATGTGGTCGATTTCCCAACGGCGCTCCGCCGACGACCTCGCGAGGTGGCACTGCCACATCTTTCAGACGACCGCCAGGGGCTCCCTGCGCCACGATGA…
Unigene32549_All	MN126020	CACAAACACAAACACAAACACAATCCCCTCAAAGAACGTCGGCCAAGAGCTCGTGCCCATCGGCTGCTCGCGACCGCTGGGGACGGTGACTGCTCGAGGCTTTACTGTAGCGATCCTCAACGTAGAGATCGACCAGCACATGTTTGACCAGCGCTTTCCAAGCGCTCTTGAGCTGCTCGTTTCGCTTCTCCCTGGCCAGGTCCTCGACGCGCTTCCGCTCCTTCGCCAGTTCCACTTCTAAAGCCTCCAGGTCGTCTCGCCAGAGCACGATGCCACCATACTTAGGCTTCGGATTCGAGCCCTCCCGGGTGAAGCCGACCACGGCAGGCGCGAAGGAGAGGCCCATTTTCGAGGCAATCGGCCTCGCGAAGTTTTCGGGGACGTAGGCCAAGTCCCGCG…
Unigene34000_All	MN126021	CGGCTCAAACGTTTGGGTCTTCGTTTCGGCTTGCAGGACAGCAGGTGCAGTTTTTGCCCCTGACCATTTGTGACAATCTTCCTGTCCATTCTTTCCATACAATTTTCGCGATTCTGCGGGCCGTCGCTTCTCTTCGTTGTACATACGGCAGCACGGCCAGTCTATTCTAATTTAGGAAGCAAAAGCAAACCGGTAGAAAAGAAGGGATCGCAGCTCCACGACCCAGCAGGCATCTCGTCTCGACTTGCATGGTGCAGAAGTCGAGCTGATTTGGGGTGCACTTTCCATGGCTGAGCCGGCTGCATCCGACTTGCACATCGTGTCTTGGAATGTTGCTGGATGGTTGAAAACGGTCCAACAAATTAGAAGGGTGCACGGCTCTCTCGCTGCTTGGTTGGA…
Unigene34115_All	MN126022	GCGGGCTGCTCCGGGCGCTCTCCATCTGCCCCCAACGCCTGTACAATCGTTGGTCCGAGCAAGTTTGCAACTGTTCAGATTTGCAAGTGAAAAGCATTCTCCCCCAGCTCATCACAACATTCCCCTGAGAGCTCGGAGTGCACGTTGCCGACAAACACGACTCCTCTTCGCAGCAGCTCTACAAAGTACAAGGCTCCTGTCTGATTCACCAAGCTCTTCCTCTGGCACCCCACTCCAGACCGAGGAGGTGAAAAAGTCGTGAAGGAGGCATTACATGAAGGCATTTCATGGTTGGAAACCAGCGAAGCTTCCCCTGTATCAGGCAGTTCTGGCTGCACCATGGAAAATGAGAACTACATACGCACGGTGGTGCTTTGTTTGCCTGCCAGGCCAACGGAA…
Unigene36848_All	MN126023	GAAAGATGTGAGCAAAAAAACATGGCGCGGTGGACGCGTCAGACTGGCCCCAGCCAGCCCAGCACAAGCGTCCGCCCATCCGCCTGCTGCCCTCTCGCGCCCTGCCCCTCCCTCCCCAATTGAGAGGCGCTGCCAGTCTCAAAGCAGATGCAGCTACTTCTGCTCCTCCATGTCCCCGCTCTTCGAGTTGGCAGCCTGGGAGCGCTTGAAAGTGGCGCGGCTGACGCCGGCCTCGAACTCTGCCGACTTGGCCAAAGCCACCTCCAAGACGGATGCCGGCAGGCCCGCCAAGCGAGCGACGTTGTGACCGTGGGAGGCTGGACAGAGGCCCGGCAGAAAGCGGTAGAGAAAGGTCATTTCGTTCGTCGCCGGATCGACGTCTGCCGCCATGTGGAAGGG…
Unigene36893_All	MN126024	CAAGCCACAACTTCGTTTCACAGGGAGGAGTCGCTCCTCTTTTCATTGACCTTTCGTTGTTCGTTGCTGGGCCTGCGGCGCTCTTACACAGCCAACATGGGGATTAAGGGGCTAATGGGATTCCTGCACGAGTCCGCTCCGAAGGCAATCCGAACATTGAAGAGTCAGCAGGCCTTCACCGGTCGCGTCATCGCCATCGATGCCTCCATGTGCCTCTACCAGTTCCTGATCATGATTCGAGAGAGCGGCGGAGCCTACAACAACCTCACCAACGAGGAGGGCGAGGTCACCTCCCACATCGTCGGTATGCTCTCTCGAACCATTAGGCTCATGGAGAACGGCATCAAGCCAGTCTACGTCTTCGACGGAAAGCCCCCAGAGCTCAAGCTCAACGAGCTC…
Unigene37482_All	MN126025	AAGAGCACCGAGGCTTGGAAGGCCTGGTTCATGAGAAGCGATTCGCACAACGTCCCAGAACCCTTGCGCAAGACATCGTCGGGATTGTAGGGAATGATGGTGCACAAAGCGAAGATGAAATCGTGGATGTACTTCATGTAGAGGTAGTAGGTCGCGACTGCATCGGAGACTGAGTAGGCAGCCAGCTCCTGAGGCCGCTCCTTGGCGAAGGGGGTCATGTCCTCTGGATCCAACTCCACGGGATCGTACTTCAGCTTGTAACGGGTCACTGCCTTTAGACCACGAGCTCCGCAAGGAAGGTAGGAATCGCGCTGGACCCAAGCGAAGCAATCCAGGTGGACCATCCAATTACCGACGTAGAAGTCACCGGTGTCTGCCTTTCGCACTCCGCACTCTTCA…
Unigene38411_All	MN126026	CGGCGTTTGTCGGCACGAGCTTTGTCCATTGCAGGCACTGAGCGTCGACTAATCTCGCGAGCAGCCTGTAGATAGTTCGGTGGGGCCAACATGCACGGTGGTTCCAGGCGGGGTGTTGCATCCAGGGGTAAGAAACTTCCTGACAAGCCCGGGCTCACTGAGGATGAGGTTGAAGAAATTCGGGAGGCCTTCAACCTCTTTGACACAGATGGCACAGGCACCATTGACCCTGGAGAGCTGAAGGCAGCGATGCGGTCTCTAGGATTTGAGACGAAGAACCCAACCATTTTCCAGATGATCGCAGATCTGGACCATGATGGACCGATTGGCTTCGACGACTTCCTGGATGCAATCACCCAGAAGCTAGGAGACAAGGACACTCGAGAGGGCATCTACAAG…
Unigene40330_All	MN126027	CTAGTCACACAAGCGCCGTGCGCGTTGCGCACCGTACTTGTTTGGAGCTGGGTACTCCAGCATGCAAAACGGTATCAGAACGAAATGCTATCCGATTTGAATTCGGCCCCGCTTTCGGGCCAGCCTTTCTCTCAAGCTTTCTGCAGGTTTTGAGGAGCACGTGGGCGAGGACCCTGCATGTGAGACGTCCTCCTTTGCGAGAGGCTCGGTGACCTTCCGAACGTTGCCCTCCAAGACCCCAGGCTCCTCCTCTTCCTCCAGGTCGATGGTGACCGGGAGAAGCCAGGAGGCTCTGGGCCGCTCGAACTCGAACTTCCGTGGCGGAGTGGGGGTTGAAGCACTTGCGCTCGGAGTGTCTTGGAGGGAGGTTTTTACCAGTTGCTCTGCGCAGGAAGGAGG…
Unigene40709_All	MN126028	CTTGGCTCCATGGGTGAGTTCACCACGACATTTCACTCTATCTTGTGCTTGTTGACCCATACTTATATTCTGCGTGTGCTCATAAGCCGGGGTCTGACTGGCGCAGCATTCACTGTGCCTCCCTCCCACCCTTCACCCCAATTGGCACAGCGTCCGAACGGACTGACATGTGCGCCGCGTCTCGGCCCACCAACAAAGATCCTTACAGTGAGGTCGAGGCGCTCTGGCGCTCCGTCCGGGACTTCGAGAGCCTCGACAAGGCGCCGCTGCAGGCGCAGCCCTGGCGCGCAGAGCTGCTCCAAGAGCCGGAGACCGACTCCCGTTGCCGTCTCTTGAAATCTTCTGGAAGCTGCGAACATGCTCGCATCTACGAGATCGATGCTCCTGGTGAGAGTCACG…
Unigene40788_All	MN126029	AGCAGCAGCAGCAGCAACAGCACGTTTTGGAGGTCCAACTCCTCGACGAGTCCGGTTGGGAAATCGGGGCAACATTCTTCGGCACATCCGCGGAGAAGTATGAGGCTTCACTGCAGCAAGGCAAATGCTACACCTTTCGAGGCGGTGCTGTCCGCTTCGCGCAGCCGGGCTACGCGAGGTGCTCCCACCCCTTCAGAATAATTTTTGACCATGGCTCACAGATCGAGGAGACTGCAGATGTTTCCAGCATTCCAAGTCAGAGGTTTGCATTTTCCAGCATTCAACAAATTCTCTCGAGGGCGCTCCCCGCCACCGTGGACCTCGCCGGCGTGGTGATCGCCGCCAAGCCCCCTTTTACCTTTGTCTCCAAAGATGGAAAGGACTTGACGAAGCGAGAGA…
Unigene40907_All	MN126030	ACGCGCAGGGTTTCCGGCCCGAGGCCGTGCAGCACATGGCCTTGCTAGGGAAATTCCACCCCAGGGCGAGGCTCCTGCACGCGAGATGGGCCACCGCTGCCGACTCGAATTTGCTGGTGCCTCGAGTGGCCGAGGAGGAGTTTTTGGCCGTGCAGGCCGCATTGCCGGACAGCGAAGCTCCATTTTTTCATCACGCCGCCTACCTGGATCGCCTTCTTTGCGAACAAATGGAGGCGAAGCGGAAGAACAGCCAAGAAGAAGGCAAAACAACGTCAGGAGGTTCAACTTCTTCAAAGACATTCGACCCCGCCAAGCTGGCAACTTTCACCATTGGAGGCTATCTTCAGGCCTTGAGGAGAGGCAACAAGAGGGTCCACTTTATCTTGAATCGCGTTCTAC…
Unigene41133_All	MN126031	CGTCCTTGCCCTTGCCCTTGCCCTTCTCGTCGTGCTGCGACTTGGGCGCCCAGCGCCGGCCTGCGCTTGAGGCCCCCTCCTCGTCCACTTCCATCTCCGTCGGGGAGCTTTTCGATTCCTCCAACCAATGCCTGACGTAGCGACGCTCAGGATCGTAGTCATTCAACTGTTTCTTCGTGTTGAACTTGTTGATCCTCTGGCCTGTAAGTCCTGCCGCTGCGACCCAATTGCCCCAATTGGAGCACGGATCGTAGTCCAACAAATGCTCTTCAAAATGGGCGGCCCCGTGCCTCCAATCCACTTCCAGATTAAAGATCAGGTAGCTCGCGACATTCTGTCGACCCCGATTGCTCATGAATCCTGTTGCTGCAAGTTCGCGCATGTTGGCGTCCACAAGAG…
Unigene41837_All	MN126032	TTGCTGCTGCTGAAGTTGTTGCTGTTGTTTGGACCCCCACCCATGAACCTGGTGGTCATGTGGTTGGTCACGACGAGGTGCAGGCGATGGGTGGAGCCGTAGCTCCTGAGCGTGCTGGCGATGTCCAGGAGGAGTCGGGCTCTCTGCGTCGTGTTCTCGCTGAACTCGTGCCTAAAGCTGAAGGCCAGGGAGTCCACAACAATGGCCTTCACGGCCGGGTGCCTCTTCAGGAAGGGCCCCAGCTGCTTGATGGTGGTGAAGAGCTCCGTCGCGTCGTAGGTCCTGCAGACGTGCATCCGCTGGAGCGCGAGGTTCACGAGGCTCTCGCTGGCCTCCCCGAATCGCTCCAGAAGCAGGCCCCGACAGATCTGGGCATAGCGCCTTGGCACGAAGGAGCCC…
Unigene41842_All	MN126033	GTTTTCACCAAGAAAAAACTGCGCAACATCATTCTCGAACACGTCCCCCATTCGAAGAATGATCCACGTTGCGAACCCACAAATCTTTCAGTCATACCGGAGTTGATGCACGAATTCTCGCCACTTTGGGGTGCACATTCTGTTGGCCCTCAAGCCCTGCCCTCTGCAACTGGTTGTACGACGCCTCTACCGCTGTGAACGTCCCCCTATAGACACGGTGGTTGCTGAGGACCGTCAGTGGCACTCCTCGATCATCTTCTCTTGGTGAACCGTTCCTTACACCTTCTCATGCTGGACCTGGTCAATGCGGGCTCTGGACCCTTTCTTCCTTAGGATCGTCCTTGTCGAAGGCTCTCGTCTTACAAGACATGCCGATCACCTTGCTTCCCAGGGGCTTAA…
Unigene41862_All	MN126034	CGAATACATAGGATGTGATTCCATGCTGCAGCAGGTGGTTCGCGAGGCTCATCAAGGCCCGAATCCAAATGGCACAGTCGAGAACACAAGAGGCTCGTCTGTACAGGCTGGAACCAAATCGACGATACTAGTCAGCTGGCCTGCTCATCCTCACACAGCCTGCTCAAATGTGGCCCCGATGGGACAGTGATCTCCAGCCGGAGCGTAATGAGGCAAGTGAAAGGCGTCCAGCAACCTCGTTCCTTGCTGCTCGGTCAGCTTCTGCGACACTACCGTGTAGTCCAATCGAAGCCCACGGTTCCACTTCTTGTTTCCAGCTCGAACAGACCAATAGGTGAAAGCTCCCCGAGCCTCGGGATGCTGATGGTTGAAGGCATCCACGAAGCCTGCAGACAGTAG…
Unigene41976_All	MN126035	GAGCGAGCTCCTGGCCTTCTCGCCCTGGCTGGCCAAGTTCGACGCGCGAGGATCGTCTTCTGGCTTGCTGTCATCGGCCGAAGAGAGGATGGAGGTGCCTGGGCAGTACGATGGACTGTTGGCACCGAATCCGCAGAGCAACGCCAAAATCATCAGCTTCCGCCCACAGGTGCTGGTCATGGCGTCCAAGCAGAAACCGAAGCGGTTGATCGTCCTCGGCAGCGACGAGAAAGAGCATTGGTTTTTGGTCAAAGGCGGCGAGGATGTCCGCTTGGACGAGCGCGTCGAACAGCTCTTCGGGGCCATCAACAACCTGCTAACGCAGGAGGGCTTAGTGGGGCTGCAAGTCAGGACCTATGCCGTCGTGCCGCTTCTCCCAGACCTGGGTCTCCTCGAGTG…
Unigene42128_All	MN126036	CATATTTCCAAACAAAGCTGCGCAAGCGCACCCGCGACCTTCGAAAATTCCAGATCGACTGGGTGAAAAATCAAGTGGGTATGGAAGTGTTAGCTGGCCCGGGCGACTCTCCACTCGACTTAAAGCGAAATTTTGCGAGGCACAGCCCACTTAGCCATAGCACCAGCCAGAAACAAGCAACTAGGACGATGCGCGAGCATGCAACGCAAACTTTCCTTTTCCTGCGTCCGTCCCATCTGCTGCGACGTCGGGCAGAACAAGTGAGATTCACTCAACAGTCAAGAACATACCTCTCCGAAACCAAACATCGGCGTGACAACACGAACTCATAGAAATTGGCCAGAGCCTGACCAGAGTCTGACCAGTGTCTGACCAAGGTCTGACTCTAGGCTTTCAGGG…
Unigene44686_All	MN126037	TTTGCGTTTCGTCGTTTCGTTTCATTCATGCCCAGACTCTGACTCTCCCCCTCTCTCTCACATCTTCGGAGAGCCAGATCAGACCAGACCAGAACAGTTCCACCGTCGTCCGCTCCTCTCTCCCTCCTCGCCCTCATACTACTTCTCCTCTTCCTGCTGCCCCTCCTGTGCTGATCCTCTCGTGTCGGCAGCCCCCAAAAACGCTCCCATCCCATAGAAAGCCATGAGCGCCGCCGAAGCGAAGGCCCGAGCGAGCAAGAGACAGCGGCGGTCCGATGCCGGCGGGGAGGACGGAGGAGGAGGTGGGGGCCAAGCTGTGAGGCCAGCGCAGGCCGTCGTGGAGGCCGCTTCTGCCCAAGAGGAGCTCGTACAGGCGGACGTGGCGCAGGATGAGCCAGG…
Unigene44692_All	MN126038	CAACAGCAACAGCAGCAACAACGGTTCTAGTCAAAACGAAGCCCTGCAACCCAATGCCTTGGGTCAGACCGGCCTTCCCAGGTGCGAAGCAGACCCCGCCCCCCGCCCTCTGCGCCTTTGTGATGTCGGCTGACATGCACACTCGAAAGCCTCATCCCGAGTTCAATGGCTTGAAGGAGCAAGGCTGCAACTTCAACTTCAGCTGCCCCGTCGTCGATCTTTGGGGCGTCCTGAGAGCCGATGGGCAGGGAACCTGCTCTATCTTGATCCACGTCCACGGCCTCCTTCCCTACCTTTTCGCGCGCATCCCGACCTATCGGGGCCCGGTAACCGACGATGTCATCGTGCAAGATTGTTTCGCCGCTCTGAAGGCTCGCTCCATCGCCGTCGTGAAACTCG…
Unigene44697_All	MN126039	GTCGTTTCCGTGTTTCCAACCAGTTCTCGTTTGCATTACACACCAACCCATCCGTTTTCCCTCTCTGAAGTCATGTCGCAACGCTCGTTAGCATCTTTCTTCGGCGGAGGAACGAAAGCTGTTGCAGCTGCGGTGGTGGTCACCGAGGATGCGGATGAACCCCAGAGGAAGAAGGCACGATTTGGCGAGGTCGAAACACCTGTGAAGTTCAGCGAGACAGAAGCCGCTATGGCCTTGAGTGTCACGCCGATGGCAACAAGCAGCAAGGACCCACAGGGCTCACCAGCCGATACCAGTGTTCCTCGTCTTCCACCACTACCAGACGGCGAGCAGGATTGGCTTCCATTGGAGCCCAGTCGAGCTGGTTGTCTGCCTGCGGCATGGATGGAACTGCTGAGT…
Unigene45362_All	MN126040	CTCAAGCGTTGCTCAAGTTAGACCTTGTGTGTAGTTTACAGTTCAGCTCGAAGGCGGAACAGGGTCCAAGACATGTCTGTCTACTCTTGGAGTTATGCGCCCACAAACAGGGCCACATGCAAGGGCTCATGCAAGGAAAAGATCGATAAGGGCGCCATTCGCTTGGGGGTCTCTTCTGATGAATCCCACATGGGCTATTCCATGACATCCTTCCGTTGTCTGAAGTGCGTAACTGCTATCCAGGTGAAAAATATGATTGCCAAGTGTGGCAGCTTGGAGGACGTCGACGGGTATCAAGCCTTGGAAGAAGTGGACCAGGGCCTGGTCTCTGCCTTGGCAGACGGCACTGGCGGTGCTGCGAAGGCAAAAGCAAAGGGCAAGGGCAAGGCCAAAGCTGCA…
Unigene45546_All	MN126041	AAAGACGAAGCTGTTGGCTGCTGTTTCGAATGCAAGTGTCTTCAACAACTTGCTTCGTGCGCCAGCGGCCCCGGTGCAACGCTCTCATCGGCAGGGTTCTGCATGGCTGATGCCGCACCAGCAGCTTCAGCTTCGGCTGCAGCTGCAGCTTCCGCCTGGGCCACCGCCTCTGCTTCGGCAGCTTCGGCTGCTACGCGTTCGGCAGCTTCTCTCCTTTTCCGGCGAATAATATCGCGCACGACGTCGGCCCCATTCGCGTCAACGGCGACTCGCCATGGTTTCTCGCGCGACCCCTTTCCCTTGAAGATGAGACCGTTGAGGCTACTCGCAGCAGCGACCGCTGCAGCAAACTCGGTGTCGGCATCCTGCTCATCGAGAGACCATTCGAAGAGCACGGCT…
Unigene45646_All	MN126042	CCAGCTTCTACTCTCCGTTCTTCTCCATAGTTGCTTCTCGTTTAGCCCTCCATTGCTGTTTCTATACCATTCCCACCATGGCGCCGACGACCGGACGCGGCCCTTGGGTAGAACGGCATCGCCCCCGCCACTTGGGCGAGGTCATCGGCAACACGGACGCTGTCCGAAAGCTCGCAGAGTGGCTGAGGGATTGGGATGATGTCGTGCTGCATGGGAAGGAAAAGGAGCAGAAGAAGCCGGAAGCTTGGCAAAAGTTCGCGCCGGCCCCCGAGAACTTGAACGCTCGCGCCGCCCTCATCAGCGGACCACCAGGCATCGGAAAAACGACTACGTGCGCGCTGCTCGCGCGCTGCAGCCCAAAGTACGGCCTCATGGAGTTCAACGCGTCGGACGCGCGAA…
Unigene46925_All	MN126043	GCTCGTTGCACTTTCGGGTGGAAGCGAAACCTATGCCAGGTATCTTCTGGATCGGCAAGTGGTCAGGGAGTAGCGCTTTCAACGACTGCTCCTCTGGTAGGAAGACCGTCTGCTTCGCGGGCTTCCGCCAGGAGCTCACCATCTTCGCGAAGAGCTTCGAGGTGCTGATCCCTGCCGAGGACGTAAGGCCCACCTCGCTCAGCAGCTCCTGCCGAAACTCGTCGCAAACGCTGGCCGCGAGGCGCAAACGCTCCCGGCAGCGAAGCTCGTCGAGGCTCTGAGGGCCCGCTACTTCGCTGGCCTCGGGCACACCGGAGCTCTTCGTCTGATCATCCGGGACCTCGCCTGCTGCAGAAAAGAGCCATGTCTCCTGCGGCCAGGATTCGTTCGGTAGAGCTG…
Unigene48309_All	MN126044	GGCCCCCCCCCCCCTGCGGGAGCCGGTCCTTTTCGAGCTTCTTGGAATTGACGAGAGGTACCTGGAACTTCCAGCGGCCAGCCCCGTAAATGTCGACCAGGTGAGCGCCCATGGGGAGGTCCTTCATCAGCGAGGTCTCCTCGTCCAGCGTCTCCTCGATGGAGCGCGTGATCTTCGCGAGGTTGGGAGGAATGACCGTCTCGGCCTCCTCGCCCTCCTCCTTGTCGAACGTGACGAAGACCTTGTTGTCTGCAACGGCAGTCAGCTTGAGCTTTTCGCCGCAAGTGATCATGTTCAAGGTGGCGATCATGTCATCCATCGGGTTGGACCAACCGCCCTTGGTGAAGCCCTTCCCTCTTGGCATCTCGATCTGGCAGGCGATGGACCTCTCGGGCGTGA…
Unigene48672_All	MN126045	GTCCGAGCCTGATGTCGTAGCAGCAGCCAGCGTGGCCAACGACCGTCGCCTCGATGGTTTCGTCATCGAGGGCCTCCACCTCGACCAGTTGCAGGCGGTGAGCTTCTGCGCGCTCGATGCGTTCAGCGACCTTCTGGCTGGGCTTGGGAATGAAGCGAGCTTTCCGTCCATCCTGGGCACCTGCAGATGTGGTGCGTCGAGGTCTCTTCGGGGACTTGGGCCCAGTGGTCTGCTTCTCGAGCCTTCGCTTGCTTTTTGGTGTCCCTGGCACACTTGGAGGTGCCGTGCCTGCCGCCACAGCGACGAGGGGCATCTCGCTGTCGCTGGCAGCAAGAGCGGCGGCAGCAGCAGCAGCAGTTCCAGGAGCGGCAGCTCCAGCAGTCGCAGCGGGGGCTGGCA…
Unigene48769_All	MN126046	ATGATCCTCGCGCAGGTCGGCGACCAGTGGTACCTTCATACAGGGGACTGCCGGGCGACGCCGAAGCTCATCGAGGACTTGCGAAGACGGCAGTTGCCCAAGATCAACACACTCTTCCTCGACACCACCTACGCCTCCTCCAAGTCCAGTTTCGCCGACCAGAGCGAGGTCATCGAACGTGTCGCTCAAGACTTGGGCCACCTACCCTCCACGACCTTGGTCTTGGTCGGTGCGTACACGATCGGGAAGGAGCGTGTGATCTTCCGCCTCGCGCGCCAGCTGGACTGCAAGATCTATCTGCCCAACGGGCGAAAAAAGAGCATCTACGCCTGCCTGGACATCGACGATGAGGATAGCGCTCGCTTTACTGAAGATCCAGCCTCGGCACAGATCCACGTC…
Unigene49976_All	MN126047	CTGAGGGCAAGTTGGCAGAAGGCAGCGTCCAAGCCAACATTGAAACACAAACTATGGGAGGAAACGCGACGACGGCAAACTACCCTTCGGCACCATTTGCACAGGCGGCAAATCGGGCGTTGCCAGAAAAAGGGGCGGCGCTGCTCTGGGATTTTCCGCCAGCAACGCGCCACCGAAAACATCGATCGAAAGATCGAGAGGACTAGGGAAAATATGCACTCACCAAAGGTTGGGGCTACGAATGCAATGAATTGCGAAAACAAATTGAACTATCTACAGGTTGCCGAACTTCTTTCGGAACAGGCATGGCATGGACGATGTCAGCTGGAAAAAATGCTGGCTTCATTCGCATCCCCTTGTAAGGGCGTTGGTTTCTGCTGTTTTCACTTCTTCAATTGG…
Unigene49999_All	MN126048	AAGGAAGGAAGGAAGGAAGGACGAGGGAAGGACGACTCCGTGGGACAAGGACATGGAAGCCAGCAGCATGGCCGACGACGGCCCCATCGCCGAAGCTCAGGTCATGCCGCCAGAGCCTTGGCGTCCCGCTGCCGAGCTTCCAGCCTCTATGGTGTCGGGCGGCTCCTCGAGCAGCACATCCACAGGAAGAGGGACCGGTGTTGCCAAGCACATCGGCAGCAAATCCCTGCCAGCTGCCAGTACTTGGGTTGGTGCGGCCAATCCTCAGCACAACATCAGCGGCAACAGCGACACTGGACACAGCAGCGTCAACCATACAGCGAGCGAGAACGCTCACGACGCTGCTCCTGGCACCTCCGCAGCTCACAGCACTGCCCACTTGTATGTCTTCACTGCAGA…
Unigene50187_All	MN126049	TCCAGGGCGGCCTGCAACACTGGGAAAGACAACAACAACAGCAACAACGACAAGCAGGTGAGGCACCGAATTACTTTAGAAGCCGAGGCCCGGATGTCAGGACACTTCGACAACAACAAAACAACCAGACAGGACAGTCCGGACAAGCAAGTCGTCAGGACGAGCGAGTCAAGACGAACAAGTCAGAAGAAGCAGGTCAGGACAAGCAAGTCAAGACGAGCAAGTCAAGATAAGAGAGCCCAGGGTGTGGCACAGCTGCTCGAAGCTGCTCGGCGCACAGCGAGTTGGGGGAGCCAGCTTCGTTGCTGCTCCCCCATGCGACGCAACAAGCAGGACACGGCAGAACGCAGCAGAACGCAGCAGAACGCAAGGCAGCGCAACACAGGGCCAGACAAGACA…
Unigene51401_All	MN126050	GGCACCTTTGGGCCTCCACCATAAGCGGTCCCAAATGCTGAAGCGCTTCAGCCAGGAGTATTTGGAGGCTGTCCGTGAGCACGGCACGCCCCTCCCAACGCCGGCCCTCAATTGCCTACATGGTGTTGGGCGCTACGCCTCGGACGCCTACCGGCTGTTCATTGGCCGGGAGGCAAATCTCGAGCCAACAGATGTCTACCTGGGATGGTTCGCACAATATCAGGCAACGCGGGTTGCTGGCACATCCTGAGCTTCGGCACGACAGTGACAGTACAGTGCCAGCAGCGACAGCGGCCAAGCAAGGCGGCGACAGCAGCAGACAACAGCAACAGCCAAGCAACAGCCAAGCAGAGAGTGCCGACAACTACAGACCAACAACAGGAACAACAGGCAAGCGAA…
Unigene52745_All	MN126051	GGAGGAAGAGGAGGAGGAGGGTGCAAATGCAGGTGGTGGTAATAGCTCCTCGCAACTCGTGGAGGCTGCGCTCGCAGCAAGTAGGGAGCCTTCCGCGCACCACTCCTCGGACTCCGAATCCTCCTCGTCGCCCTCGCCATCGTCGGGGCCGCTCGGCCCTGTGCAGGAGGCGAGGGCGTGTTCGGTGGAGGGAGCTTGGGGGGGGTCTTGCTTTGGAGCAGACGCAGTGGGTTCTTGCCAAGTGAGAGCCGGTGTTGAGGGCGTCGGTGCTACTGGGGGTGTTGGAGCCTCCAGGGCCAGTAAGGCCGGCTTGAGCTGCTGTGCAAAAGGCTGGTGCGTCATGGGGTGGATCTCACCGCAAGCGATACCAATTGCGACATCGTCTGCCAGGGCTGGGCC…
Unigene52773_All	MN126052	TCTCCCTTGTGTCCAAACCGCGTCTGTTTTCTTCCCACTTCTTCCACACCACTTTCTGTCGATACCTCAGTGCCTGCCTGCAGGCCATCCATGAATTGGACGCTTTGCCACTAGCTTCTCAGGGAATGGAAACCGTAGTATTGCGAAATGAAGAACCTCACCAATTTGAAAGCCAGGACCCCCGGCACTGGGCTCGCGACCGCTCGCGCAGTGCATCGTCCTCTGCGAAGGGCCAGGCTAAGAAGCGGGAGCAGAGTCAGGGCAGGCCCACGCGCAGCGGCGGCAAAATGGTAGCCCCGGCTCCTGCCACAGCCGCAGCTGAGGCGGATCGCCCAGTGGAAAACGGATTCAACGCCCAGGTCAGACAGGGAGCCCTGTTTGGACCCCCCGAGGACCGCT…
Unigene53685_All	MN126053	CTCAAGCTAGCATTGTTGGCCACTTATCGGAGACTGTCCAACAATTGGGTCAGCTAAGGGGTGCAATCAAAGATGCCACCCAAGGCCAAAGCCGGGCCAAAGGCCAAAGCGGCCGGCAAGGCTAGAGCCAAGGCAAAGGGCAAAGCGAAGGCAGCAGGAGCAAAGAGGGCCGCCTCGCCAGCGTCGAGTGGACGCAGTGGGGGAGATGCAAAGCGAACCAAGGCTGCAGATGGGTCTGCGAGAACAGTTGGTGCTGCTGCTGGCCGGTCGTCTGGCACTTCGCGTGGCCGAAAAGTTGATGAACGAGCTCCATCAGGCATGAAGGTGTACGAGGACTACTCCTTCACGCTCAATCAAACAAACGTCGGAGCCAACAACAACAAATATTACATCATCCAG…
Unigene54870_All	MN126054	TACCTTTTCAGGCAGGCCTTGGAAGTGTTCTTGTCTGGAGGCATCTCAAGGCCGCTCTCTCTTTCGCCTGCAGAGTCCAAAGCATCGCTCGGACAGGGAGCTGCAGCAGGGGCGGTGGAGATCGTCGCTACGTGGGGGATGTGTATGCCGGGACAGAGTTCGCGGGCCTCTGTGGCGGACATGCCGCGCTTCACGCCGTGGGCCCGAGCGGCGTAATTGATGGCGAGCAAGTGATCCCATTGTGCCACGGCGAGAGGAATCGAGTCCTTGGAGGTCCAAGGAGGCTCCCCCAAGCCGAGGCGCCGCTGCTCAACCTGCGCGTAGAAGCAGTCCAGGTCCAGATGCACGATCGCTCTCATGGCCAAGTGCTTGATGTGGTATAGGTCAGGCGAGCTTGCA…
Unigene56264_All	MN126055	CACACACACACACACACACCACGATCACGCAGCCTCCTCCACCCACACATAAAAAAGAACAACAACAATAGCTACAAAGTTGAAGACCCCGTTCCAGTCAAAGACAAGCGAGGACGTCGCAAGTTGCCGCTTGCCCAGCCTGCCTGGGGAGGGGGCGTTGGGGTTCCACGGCCCTTTCCATCTCCATCTTCGGATGGGAGAGTGCGTCCCCATCGGCAGCCGGCGTCGCTGGAAGGGAAAAAATATCGGCTGCCGCTCACCAGACAAGTAATTAGACTCGGGCTTGCTCGTGAGCGCTGGAAGTTGAGCCCAGCCAGACCGCTTGACAACAAGATGCCCCATCTCAAGGGCAGGGGGCCAGAGTTACTGTAGTTTGTCAAAATTCGTTGGTCTTTGCCC…
Unigene56338_All	MN126056	GTTTTGGTGTGATTTTGTAATTTGGACACTCACGATGGCAGTAGCAGCCACACTACCGACTGTGAGGCGGGAGTTGGAGGATGTCTTCCGACGACAGTTGGCTCCGAACGAGGGGTCCGAGGAGGTGGAACCGTCTTCTCTACGAGACCTTGCCACGAAGGACTCCGCCTGGGAAAGCCTAGACAGTTCCCTCTTCGCGACGGTTTGGCCGTTCCTTTTTGGAGAAGGTGGACTGCTCAACCTGGTCCGATCACACAGTCCTCAGAAGCACCTGGGAATCGTCCATTGCCGGAAGCATGCCCTGGAAGTTTGCTCACGGTTATTGGAGCAGCTCCCTGGCTTGGGACTAGAGCTTCGAGGAAGGCACATCGAGGCGTGGGGTACCATTGCCGAATCGTG…
Unigene56396_All	MN126057	GAAGAGATTTTCAGCGTCATCACGCGCCATGCGAAGCGCGTCGAGATGGCTGGCATGGACGAGGCCTACATCGACCTCACGACGGAGGCGACGCAGTGGCTGCAGAGTCCCGAGGGCACGGCTCCGGGGGCTTTAGAGGCCTTGGCAGAGTCTGCCACCTGCACAGAAGACAGCCACGCAAGCGTAGGAGATGACGCTCTGCTCCTCGCCGCCTATGCGCTCGTCGCCCGGATTCGAGCCGACGTGGCGCGAGAAACCGGCTTCACGGTCTCTGCCGGCGTCGCTCGCACGAAGATCGTCGCGAAGCTTGGCTCAGCCTGCCACAAGCCGGACAGACAGACGCTCGTCCCGGCCTCGGGGGTCCAGCAGTTCATGTCGAGAGTTCCCTTGAAAGAGCTT…
Unigene56453_All	MN126058	CGCCGCGCGAACGTGCTGAGTCGGGTCTCCTGCAAATGTCGAAGTTGCTTCGGTTGTCGTCAGGTCAACTTCGCGTGTGCGACCGAAGCTGGCCGATCCATGCTCCTGCCCCTTCGGATCGCGGTCATCGTGGCTCTGGCTGGAGCCGTTGCTGTTGCTGTCGCTTGTGCAGGTGTCTCCAATCTGGTCTTGGGTTCCCAAGGGTGGAGGGGACGGCGGCATTGGTGGGATGGCGCGGGGGCTTGAGGTGGCGATTTCGTCGGTCCGATGAGAGCCATGCTGCAGCAACCGAAAGAACCTTTGAAGTGCAGCTTCTGGCCACCCGAATCGTCGTAGCGCGACCCAAGCGTAGGAGTCGTGGCAGACCCCATCCTCCAGAGTGTAGGTCCAGTGGGGATC…
Unigene56596_All	MN126059	CTGTTGCTGCTGCTGCTGCTGCTCGTCCCAAGCGAAGTTGTCAGAGCAATGGGCGCGGCTGGGTTCTTTTGCTGCCAGACAGAGGCAGCGAGGCTCCAGAAGTTGGAAGCATCTCGCTGCTGGAACGTCACAGGGTTGCTGGGGGAGCCGAACTGCCTGGAGCCCTGAGAGTTCAAGCTAGCAGCTGGGGTAACGGGAACAGGCGCGAGAGGCGTGGCAGGGGGAGAGCAGCCACCAACACTGAGCACAATCGTGGGCCCGACCTTGGCAGAGGGGCGGCTAGATGCAACCGATGGGCTGGGAACGGGTGAAGGGGCTTGGGATGTTGTCACAACCGATGCTGGAGCTGCGGATGCTGTTGGCGAAGCCTGTTGCGCCACGGCAGGTTTGGCTCCCGAT…
Unigene56781_All	MN126060	CTTCTTTTTCTTCTTCTTCTTCTGTTGACTGCGACTCTCCTGCTGCCTCTGCCTCTCCCTCCCCATCCCTTTCCTCCCCATCCCGAAGTGGCAGCTTTGACCGCTTGGCACACCTGCTCGACAAGATAGGGAGCCTATCCGGCAAGGGTTCAACCATCGCTCGCCGAACCTTGTTGAAGGAGTACTTCCTGGAAATGCTGCAAGAAGCCGACGGCCCGCAATCCCTGGGACCCGCCCTGCACCTCTTGCTCGGTCGCCTCCATCCGCGAAGCAAAGCTTTCAACTTGGGCGTCGACCGGGCGACGGTGCTAGGTGCAGTGGACTTGATAGACGAGAATTCGAGGCAGTTCATCCAGGAGGACCTGCAGAGCGGTGCGGCCGATGATCTCGGAACTGCCA…
Unigene57291_All	MN126061	TTTTGGATCGAGCCCTCAACGACTTCCTTTCGAGGTCTCTCTATTCTGTTAATGTCATCATGGGTGTGCAGGGACTTTGGGATTTGGCCTCCCCTGCGGGGGAACGACTCCACATGACTGCTCTGGAAAACAAGGTTATTGCAGTTGATGCCAGCATCTGGCTTTATCATTTTCTCAAAGCTATGCGAGACGAGGCTGGCAACATGGTCAAGGGAGCTCATGTCATTGGATTTTTCAGAAGAATCTGCAAATTGTTGTACTTGAAAATCAGACCAGTCTTTGTATTTGACGGACCGCCTCCACAACTGAAATTGCGAACATTGCGGCTGCGTGCACAACAGCGAGATCTAGAAGAAAGGCAGCGGAAAAAGGCCGTCGAAAAGTTGCTTCGAAATCAGC…
Unigene57597_All	MN126062	GGGCGCGGATGTACTGAAGCCGAATGGTGTCCAGTACCTGTTTGAGCATCGAAGAGCGATTGTAGAGGTCCATCGCGTCGGGGTGAAAGCGCTTCAGCACGCTCTCGTGGCTGAACCCGACCTTGAGGTCCTTCAAAATGATCTTCGCGATCCATTTCTGCTCGATCGCGGAGGCCCGTCTGGCCAGGTCCAAGAGCTGGGTTCGCTTCTCTCCGGCATCCGAGGTGTTGTGGATACGATCGAGCGCCGCATTTACATCTCCGATGGTCAAGGTCGATTCACCTGGCTTCACCGTGGCCCTCGCCTCCGCCACGCTGTAGAGCACTGAAGCGAAGTCGCCGGCTGCGCAGCGGTACCCCTCCTGCAGGGCTGGGTCCTTCCAACGGAGCAAGCGCTGCT…
Unigene57737_All	MN126063	GCCTCCTCTGCCTCCTCTGCCTCTGACTTGCTCTTCCTGAACCTTCCGGCCGCCGCCGCTGCCCTTTCCTTTTCCGCTTCCGAGGCCTCTCCCTGTCCGACCACCTGTGCCGAGGCTCCTGCTTGGCCAGCCACCCCTCCCGCCGCTGCTGCCACTGTTGCAGCCATTGGCTGTTGCAAGAGCGACGTCAGGGTAGCTGTGGTGGTAGTTGTGATATGGGTCAGTGCCAGTGCCGTCGTGGATGTGGGTGGAGTAGCCACGCCCACCTGCACGAACCACTCCTGCGCCATTGCCACCATCACCACCGCCACCGCCAGATCGGTGTTAGTTACACAGTTAGTCGCTCTTCCTTGTTCCTTCATCCTCACAGGTCTTACTTTCAAGTTCCAGACGCACTTA…
Unigene58152_All	MN126064	GTGACTTCAACCGCAGACTTCGCTTCATCCGCCGGCTTTCAAGACGAACACACCCTGAAAGCGACTCAACATGGCCGACGAAGCATCGGGGGCGGCTCCGGCGCTGACAGTCGAGGATGTGGTGGAGGCCCCCATTCAGCTCAGCGACAGCGATTTGAAAGTCATCTATGACTGTAAGGAGCTGCTCACACGCGCCGGCAGCTCCAGGCAGGAGCGGCTCGATGCCTTGGACCGCTTGGAGAAGATGGGAATCTTCCACTCGAAGCTGAAGCAGGAGCTGGGCATGGAGGAGGTCATGGATGTGCTCATGCGAAGCGACGACCAAGAGGTGGCTCTACGGGCTTCTGCACTGAGAGAGGAGCTTTCGCTGCACCGTTTCGGCCGCAAGAAGCGAGTCTC…
Unigene61374_All	MN126065	GAACTCCAGGGCCCGCAAGCGAACGAAGGAAGTTCAGGGCCGCGAGATCATCTCCGTCGACATTGACGGCCGCGTCGTCTTCGACATGTTGGTCGTGATTCAGAAGGCACAGAAGCTTAGCAGCTACAGCCTCAACGCCGTCTCGGCGGAGTTTTTGGGCAACCAAAAAGAGGACGTCCACTACAGCGAGATCGGCAAACTTCACACTGGGAACGCGGACACCCGACGGCGATTGGCAGTCTATTGCTTGAAGGATGCCTTCCTTCCCATGCAGCTTATGGAGAAGTTGCTCTGCATGTACAACTACATCGAGATGGCTCGGGTCACCGGCACTCCCATCAACTTCCTCCTGAACCGGGGCGAGATGATCAAGGTCACCTCGCAGCTTCTTCGAAAGGC…
Unigene61410_All	MN126066	GCTGGGGCTGGGGCTGGGGCTGGGAGGAGTGCCGGGCAGCAGAACAGGACCGCTGCGGACCATGTGGAGGAGGAACCGAGGAGCAGCGCTGCATTCACCGAGTCGCAGTGGGTCGAGATCGGCCCAGATCCTTCCCGTGCAGCACCACAAGCGGAAACAGTGGAAGGCTCCACACTGAGGTTGCCACGGCAGGTCCATGATGCTCTTAGGCCGTACCAGGCCTCTGGCGTGCGCTGGATGTGGGACCTCTTCAAAGCGCGAAATGGAGGGGTCCTCGCAGACGAAATGGGTCTAGGCAAGACGGTGCAGGCCTGCGCCTTCCTCAGTGGCATCCGAGCCGCGGGTGCGAGGCACGCCCTCATCGTCGTCCCCGTTTCCTTGCTGGAACAGTGGGCCTCG…
Unigene61441_All	MN126067	CGAAAATCGGGTGCCATTTTGATTGGTGCTCAATCCGACCCTTCCGAACTGTCGAAGAGGAGAGCTGACGAAAACATGCAGAGGCGATGGAGATCTGTCTATATACACGCAAGCGGCTGCACCTGCTTGACAACAACGACGACTCGGCCTGCGCCGGCGAGGCACAAGTTTAGTCCAGAAGGGGGGGAAGGGAGGTTGCAAAGAAGCAAGAACAGAGACATGGTGTTCGCATCGAACCAGCAGCGCGGCTGACTGTGCCATGAGGGGCCGTTGACTCTGATCAGCAGAGCAAGACCAGAGTGACTGTGACAGCGGCGGCCTGAAGTGCCGCTGGGGAGCTATTGACCGACTGCAGTTGGATGAGAAAGTAACTTATGGTTCCGAAGTTGAGACTCTGTG…
Unigene61604_All	MN126068	GTCAGTTGGCTCATAGTGTGCAGAGCCCCAGCACGAGAATTCAGATATTGCGAGCTCAGCTTAGCATGGCCCCTGTGGAGCTGAACGAAGTGGTTGGCAGCCAAAACGACGATGCCGACGTGCGACTGACACCGACGCAGCCGGTGCCCTGCTCCCTAGAGCAGCCCTGCCCCACGAAAACGGCCGTGCTCGCTCGGCTGCTGGTCATCTCCGAGCGCCCGGCTGGGGCCCCGGCCATGTACGAACTCCTCCAGCGGGACGAGGAGCTGCTGATTGGACGCCACGACAGCTGCCAAATCCGAGTTTTGGACAGACGAGCTTCTGGCAGGCATGTGAGGATCTATCGGGAGGACTTGCCAAATGGTGGATTTTGCTTCATGGTCGATCAGCTCTCCTCAA…
Unigene61676_All	MN126069	CGGAAGGTCATCGCGTCACCAGAAGACAAGGTTGGGGTGGCGCTCTACGGAGTACGCGAGAAGCTCAACCCAAACGGCTTTGAAGGTATCAGACTACTACAGGAGCTGGACAGGCCCTCGGCGCAGCGGATAAAACAGCTCGAGCTCGAAATTTCTAGATCGCCGGAGTCCTTCGAGGAGCGATATGGATTCGGCCGCAAGGTGATGTTATCGGACGTCTTTTGGACGTCTACGACCATTTTCAACTTAGCAGCAAGCCCGAAACAGTTTGAGCCCCGAATTTGGCTCTTCACGAGCACGGACGCCCCTTGCGGTGATGGGCTTGCGGAGCAGCAGGCAGCTGAGACACGGGCCAGGGACCTGAGGGACCTTGGGGTCCAAGTCGAATTTTTCCCACTT…
Unigene62006_All	MN126070	GGGCTTCCCTGGTCTTGGCTGCCTCTCCCAACGGTAAGAACGCTGTTGTCGCGGCGATTTTGAAAGATGCAGCCGGCCAGTCCGTGGACTCCCACGGAGGGCTCGGGCTGCGGAAGAGAAAGGAACCTATGCTCTAGCAAACAAATCACACGTGGGAAGTATGCAAGGACAACGAGGTCGTTGTCATGGTGTCACGCTGTCACGGTGTCATGGCAACTTTGCGGATGGACACCTTTCCTTCACGGCGCAATCCGAGCACTTCGGCTTTTGTGCTGTGCAAATCTCTTGCCCGAAGCCGACGAACTGCTTCAAGCCATCGACACCCCAGTGGCTTCGGGGCAGCCAGGACTCGAGCTCCAGCCTCGTCTTTTCCTCAGTAGTTGTGGAAACCCAGCCCAA…
Unigene62212_All	MN126071	GCTGCTGCTGCTGCTGCTGCCTCCGCCGTGGCTGTGGCAGCCGCCCTCGCCCTCCTTCAAGTCGCCTGCGGAGCCGTCGTCGTCGTCATGATCCTCGTCGTCGTCGTCGTCGTCGAGCCGCGCTCCGAGGCGCCTGGTCCTCGACGCCACGGCGCTCTCAGCGCTCGAGATTGTCGAGACCTTGGAAGGCACTTACAAGGGTTCACTCTTGGATTTCCTCAACCACACGAGCACCGACTTCGGGTTCCGACTGCTGAAGCAGTGGCTCTGCGCGCCTCTCTTCGATCTCCAGGCGATCCGAGACCGCCAGGAGGCTGTGCAGTACCTGAGCAACACAGCAGACGTTCGAGACGCCCTGCGCGCTGGGTTCAAGAAGGTCGGGGTCGACCTTGAACGTGC…
Unigene64853_All	MN126072	GAAGATATGAAGAAAGAAAGGAAGACGACCTGGCGGGCTCAGTCACTGCCATTGCGGACGCCGCCCGCAAAGATTTCAAAGACACATTCAGACTCCGGCAACCAGGGGGAGTCGAAGACCTTGGCCACGCGCTGCTCCGCGCGGCCCTTTCGCAGGAAGACGCGAGTGGTTGAGAAGTGGGCAAGGATGTGACCTCCAACGGGCTTGGGGTGGCTCGGCATGAAGGCGCAGCCGCCGCCGGGGTCCGCCATGACCTGGTTCGTCAAGACGATCGCAATGTTGAACTCCTCACTCATCTTCTGGAGTCGGCTCATGACCTTGCCCAGCTGCTGCTGGCGCTCTGACAGCTCTCCACGACCGGAGTAGTCCACGCGAAAGACGCCCATGATGGAGTCGACA…
Unigene64896_All	MN126073	ACACACACACACACACACACGTACGCGCACAACTAAAACGTTCTGCACACAGAGACAAGAACATCCACAGACTCCACACAATCGAATCACACCCACACACACACACACACTCGATCTGCTCCCTCTGCTCACTATGGCCGCCGCAGGGAAAGGAGCCGGTGCCTCGGCTGCCTCGCCCACAAAGACGAAGCGTGCCTCTGCGGCTTCCCCCTCGCCCAAGTCAAAAGCAAAAGGGAAAGCGAGGGCCGCCGTCTCTGTGAAGAAGAAGACTACGACCATCAAGCAGACCACCACATCAGAGGTCGTCTCGAAGGGTGTGTCGAAGTTCTTCGCCTCAGGCAAAGGCCTTTCCCTGAAGTCCAGCATACCAGACGCTTGGAAGGCAGATTGGCCCATCAT…
Unigene65173_All	MN126074	GCTAGCGGTCGTGGGGCTCGAGGTACGGTTCGCCCAAAGCCTCGAAAATTTCGCGCTCGGAGTTGCACAAGACGCGGTCATCCGTCCCGGGGCATGTTAGTCCGTATTCGCTCAACCTCATCCCGAGATCGATCGCTTTCATTCGCAGTCGTACGCTTAGCGCAGCACTACCTGTGAAGTAGAGCGTCCCGAAGTGATACTGGTCGTAGCGAACGCAGCGGATGTCTATTCGTCTGTGCAGGTAGCCTTCCTTATTCAGCCGGCAAACCCCCATGTACTTAGAGTTCCCGAAGGCTAAGTCGGCGATAAGATAGCCCGCCTCGCGAAGGGTGTGGACAAAGCTTCTTATGATAGCTCCTCCAGCGTTCTCCTTCAAATTGTCGGCTGTGAACTTTTTGG…
Unigene65253_All	MN126075	GAGGAGTTGTTCCTGCATCGGGACCTGGCCCCTGGAAATGTTCTCGTGCATTTCGGAACGGGCACAGCACGGATTGCAGACTTCGGGATGACCCGAAGCATTGCCCATCCCGATCGACCATTGACAGCCAGGTGTTGCACACTCTGGTACCGCGCCCCCGAGCTACTCTACGAGGCTACCTGGTACGGCTCTGGTGTCGATCTGTGGAGTGTCGGCTGCATTTTGGCCGAGCTCCTCCTCAGGAGACCGCTCTTTCCGTGCCGAGGCGAGATGGAAATGATTAGAAAGATTGTCGAAATCCTCGGATCCCCTTCTGAGGATTTATGGCCCGGCGTGACCGCACTTCCGAAATTCTTTGGCTTCTCGGATTTTGCCAAGCAACCTGTCGATTCGTGGCTG…
Unigene66528_All	MN126076	AAGATTTGTTTGGCCAAGCACTTGACATGAGTTTCGTCCAATTCCAGAGCAATGTCCTTGATGAGTGTCCTCAAGTCACCGTCCATGTAGTCCATCACTATCTGCAAGTCGCCATCTTCCAGGAAGATGTCTCGGCAACCCATGACATTGGGATGGCGAACAACTTGCATGACTTTGATCTCCCTCAGAACGCTAATGCCGATGCCCCGTGCCTCGGCAGTGTCCCCGAAAAGAGCTTTGGACTTCTTGATGGCCACCTCGTCGCCATTCCTCCGGTCGCGAGCCTTGTGAATCTTGCCATAGGTGCCCTCGCCGATTCGACTCTCGACCCGCTCGTAATTCTTCGAAGAGTCTGTCGACATCGACAGCGTTGCCGATGCCGACATGATGCTGAGCGAT…
Unigene67393_All	MN126077	AATGGACTCGAAGACCCGGTTCCGCTTAGGACGACGGAAGGAAGCTCCCACTGTCCAGCCAAAAGTCCCTTCTGTGGGCGCTGCACTAGCAGGAGCCGGCCTTCTTCATCTGTCAGCACGACAGCTGCCAATTGAACAACCGATCGTTCCTTCCTTGGAGTTTTTTCGGGGAAGGTGGTGACTGATGCAATTTTGCCTGCCGCCAACTGTGCGGCTGCTTGACAAAAGGGCCGGACGGGGCAGCGGTCGCAAGTAGGGACCTGGGGAGTGCAGACCGTGGCCCCCAATTCCATGAGGGCCTGGTTAAACTCAGCTGGGGCGTCGGGATCTAAAAGGTCGCCAGCTAGCTTCCAACATTGCCGGTTCAACTCCTGACTGGCGGGCGATCCGGGCAACGTC…
Unigene68129_All	MN126078	GAGGCCGTGGGGGACGAGGAGGCTCGGGGAGACGCCTAAGCTCGTGCTGGCGAGCCTCGCAGTCAAGTGGGAACAATGGATGACGGCATCCCACCTCTCGGAGAGACGCCCGTAGTGGTCCCCGTGGAAGTGAGACAGCACGTAGCTGTGGCCCTTGTCAGAGACAGGCTTGTAGAAGTTGTCGATGAAGATGTTAGTTCCGGGCAACTGGTGCGTCTCCAGGTCTTTGTTCATGGCGGCCGTTAGCAAGCACTGACGCCGCCCGGGAAGACGGAGTGGAGGGAGTGAGGGCGCGAACAGTGAGAAAATGAGCTTGCTAGATGCAGAACTGGAAAATGGAAATTGGAAGCTG
Unigene68760_All	MN126079	CTCAAGTTTGCATTGGGCGGCCTCTCTTTTATAGCTGACGTTGTCGGGGCCGTTTGAATTTGAAAGGTGGCAGCGAAAAATGAGCACCACCATTACAATCAAACCCATCAAGGGCGAGAACTTCACGGTCGAAACACAGCTGGAGGCCAAGGTCTCAGACCTGAAACAGAAGATTGCAGAAGCGAGGCCAGAGTTCTCCGCCGATGCCCAGAAGTTGATCCACAAAGGCATCATCTTGAAGGATGACAGCACAGTCGAATCCATCGGTGTCAAACCAGGGGAGTACATTGTCGTGATGGTCACGAAGGCGAAGCCAGCTCCTGCAGCCGCCCCTGCCCCTGCCGCAGCAGAGACACCAGCAACTGCAGCAACACCCTCCCCTGCGCCCGCGCCCGCGCC…
Unigene68813_All	MN126080	CTCAAGCCCACTTGAAGTTCGCACCCTCCAAGTACTTAGATCTGGGTCTGCGTTTAGCCCCTCCCGCACGTGTTGTGCCACCCCTTGCCAATACTGTCGGTTGCAGTGGATTCAAGTTGCCTTCTGCAGCCTGCCACCTTTTGCAATGGCAAGCGAAGGCACAGAGAGTGGAAATGTCCAATCTGGATACAGATTCGGAACTCAGGATGGCATGTTCGAATTGGGCGAGGAGGTCGGTAGTGGAGCAGCAGCGAGAGTCTATGCCTGCCGGAGAGTGAGCACGAACGAGGAGTTCGCTTGCAAGGTCATCAACATACAAAAGTTGCGCTTGCTTGGGGACTTCGAGTCGCAGATGGCCAAGTTGGACCGAGAGGTCGGTATCCTGACCCAATTGAGCCA…
Unigene68915_All	MN126081	AGTGCTTTTGTTGCACCAACTCCATTTCACACAGTGAATTTCTTTCCCACAGTGTTGTCTGTTGTTGTCTTTCCATTAGCTAGATCGCCACTTCGAAAGAGCCATGACCACTGTCTCAAAACTCGGAATCCAGGGCATCCGAAGCTTCGATCACGAGCGAACGGAAGTTCTCGACTTCGAGCTTCCGGTCACTCTCATTGTCGGTCCCAATGGATCAGGGAAGACCACCATCATCGAGTGTTTGAAGATGGCTTCTTGTGGGGCATTGCCACCAAACGCGAGGAATGGCCATGGCTTCATCCACGACCCCGCTGTTGCCAAGCTGCCAGAGGTGAAGGCCCAAATTCGGATG
Unigene69195_All	MN126082	GACGACGACGACGACGAGGAGGAGCCTTCCATGGCTGCCCCGGCGGCCGCGGCGAGGGGGTCGAAGGATGGGGAGAGGGCCTCCCAAGTGGCGACGGGGAGAACGCGGCTCGAAAGAAGAGCCATCTCCAGGTACTTGAACGCGCTGGCGACGGCGATCTGTGCCCCTTCCTCTTTGAGGCTTTCCTCCACCGCTCCCGAGAGCTTCTCTGGGTGCGTCAAGCGGTACTTGCTGACGGCGTTTCTGGCCGCGAGTGCGTCAACTTGATGAACCACGGGCGAAAGCTGGGGTCGGCAAGGCAAGCGTTTGAGCAGGCCAAGCACGTCTGCCGGAATGTTGGCAGCGGAGTAAACTACCTCGCTCGGCTGTGTCTGCGCGAGCAGCGTCCGAAGCGCATTT…
Unigene69752_All	MN126083	TGGCTCAAGTGCTCAAAGTCTTGCCGTCAGCCGATTCGCTCGCTGCTTCGCACATTCCTTCCGTCCCCGCTCCCTCCTTCCACCAACTCGCAAACATGGCCGCCGAGCAGTTCCTCCCCATCAGCGAGATCTCCTCCTACCACACCAAGTGGACCATCTGCGGACGTGTGACCTTGAAGGGACAGATGCGAAGCTTCAACCGCAATGGCCAGACCACCTCGGTTTTCGACGTCCACCTCCTCGACGAGTCCCAGGTCGAGATCCGCGCGAGCTTTTTCGGGGCCATGGCCGACACCTACTACGAGAAGTTGCAGCAGGGTAAGTGCTACACCTTCAGCCGAGGAAACGTGAGGGTTGCCAACCGCCAGTACAACCGAGGGTGCACTCACCGCTACGAGC…
Unigene70580_All	MN126084	ATGGATTGTGTCGTTCATTCAATGTTCTCAGCCTGGAGAGGCGGCAGGGCCCAATCAATCTCGTCCAACCCCAGAGACCTCAAAGCCGAATTGCACTTCGAGAAGGTCTTGCACCCGAACCACTTCTTGGCGCTCAACGGGCTGGGGTGCGCGGACTCGATGACCGTGTGTTTCTTCCGGTCGATGATTTTCCCTTTCTTCTTCGCGAAGCCCCCCCACAAGAGGAAAACTACAGGCTGCGGGCGTTCGTTGAGGATCTTGATCACCTGGTCTGTGAAGCCCAGCCACCCGCACTTCGCGTGTGAGTTTGCCTCCTTATGGCCCTCTCGCACCGTGAGGGTCGCGTTGAGGAGCAGAACCCCCTGCTTCGCCCAAGGCAGTAGGTACCCGTGATCCGGA…
Unigene70894_All	MN126085	GCGATGTTCAAAGCAATGCTCAATACATGTAGCTCCGGTGCCGTGGAGGCAAGCAGTGTGAAAGACTGCACTGTGAATATTTACAAAGCCTCCATTGCAAATGCCTTTCCTGCAGAAAAGCATGCACATGGAGAGGCTGGCAGGGGGTGGTGCGTCCCGTACTTCTTCTTCCTCATCGTCCCCTTCTTACTCGCGCTCACTGGCGCTCGCGAGAGTGCTTCTCTGCCGCTGGCCTCCTCAGTCCTCCCCACCGAAGTCGCCTGCGCGGTACTTCTCCAGGCGTTCGATTTTCCCGGTCTCCAGGTACTCCTTCACCTTCTTCGTACTGGCTTTCCCCACGCCCGGGAGCTTCCCAGCCTCCTCGCTGGACTCGACTTTCTCTTCCAGCGATGCCAACTG…
Unigene72430_All	MN126086	CCGGGCGGCGCGTTGTTGGCCATTTGGTTGAAGACGTTCGTGAGGGATACGACGAGCTTCGACCAAAATTGCTGCTTGTCTGGTGCCAAGTCCGCATCCGACAACTCGGGCGTAGCCACGGATGGCATGCCCAACTTCGGGCCCATGTTCTTCAGGGCGTCGAGGAGGTGCCGGCTGCAGCTCGTGTGCAGCTGCCCGGCCAGGTCGGCGTAGCCGTCGAAGGTGATGAACTTCTGCCAGATCTCCCTCCACTTCGCCTTGGCAGCAGCTCGGTTCCCTTTCAAGAATGCGTCAGAAAAGGCCTTCCGTTCAGGATCCCATCGCCGGTCAGGGTGAGTCAGACAGTCCAGAGCCTTGGTGAATTTCAATGCAGTATTTACAGGGGCCCCGGTCTGACGC…
Unigene72723_All	MN126087	CGCCGATATACTCGTCATCACAGCTCTAGAAGGTGCAAAGCAACCAGCCATCCCTTGGGGAAAGCAGAGGTCTGCACTCGAGCAGTCGGGGAAGGCAGCGATGGAGCCAGCAAGGGGCCGGGGGGTATTTTGGGATGCTGCTGTCGGGGCGACCTGCCTCAACCTGCTGGCTCTGCTGCTGAGGGGCCTTCGCTGGGGCTTTTGAGGCCAGGAACAAAGCTATGAGACATGTTGTTGGACTAGGAGAAGGAAGAGGAGGAGCAGGAGGAGGAGGAGCTTCCTTCTCCGGTTTCTTGAGCCCAGCCAAGGTCGAGCATTCGACGTTGGGTGAGTCGCCAGCTATGAAGCGAGCACGAGTCGCAGCGACAGGCCCGAAGGCCGAGTTTTTCGACGACGCCG…
Unigene72956_All	MN126088	TCAAGACGGAGCGCGGGGGGAGACAGGACAAACTCATCAGAACGACAACAGCCAAAGGCCGAAAGGAAGGCAGCGAACCGCGCCGCAGCACGACGTGGCCTGAACCCCCCCACCCCGCCAAGCGTAGGAAAACCCACAAACATAGACATAGCGTCGGTCCTTCTGCTCTTAGTTCCGAGCAGAGAGACATCCATCGCGCGGCGTGAGCGCACCCTCCACCGCCACGCCGCCTGTGTATATACTAAGATAGATAGACGTTAGAGACTTAGAGACAGAGAGAGAGACTTTTTCAACATCGTCGTCGTCACTCGGCCTCGGCGATCTGAGTAGCCATGGCCAGGGGACCCAGTGGCACTATGGATTGGCCGAAGGGGAACGACGTGCTGCCCTCCTTAGCTG…
Unigene73596_All	MN126089	ACAACAGTTGAGGTCCGGCAAGGCGACTTAGGGACTATGGACAGCAACCGCACAACACAAGTTGGGGGTCGATGCATGCAGTGCATTCGGGCTCGGTCGTTCACGACCGCACCTGGTTCCTGGAGCCCAAGAACAAGAGCCATGGTCACATGGTCAGAGAGTGGAGGAGTGTGGTCAACCGACAGAAATTGAGGCGCGGATAGCATCCAACAACCCATTCCTGAACTCTTTTCGTACGGCATCTCGCCACACCTCCTGCTTGTATCCTCCGCCTAGCATGTGCTTCTCCAAGGTGGTCTTGTCAACAACCATCCGGTCACCTTTGAGCAGCTGCAGAAGAGGAAGTTCAGCTTCCGGCGAGTCGTAGGCCGGCGGCGGCTCTCCCCAGAGCAGCTTCTC…
Unigene73707_All	MN126090	GGTTAATGTTGGCTCGAGCTGTCTTTGCTCTTGTCCTCGTCTCACATTCGTGCTCATTCGTCCGGCCTGAGAGAGAGCCTGCCTCCGGGGTCTTTTTGACATAGGCAGTGCTTTTGGAGCAGGCTTTCTCTGTGTTCCTTGTGTGGTTTGGTGTTTCACTTGTTCGTTTCGGGTAACTTCCGCTGCCAAAGGAAGTCTGTCTGTTCCCTTTATAAACAATCCGCTCCTCTTCACCCAAAGACTCTTTTTGTCCAGCGCAAAAGCGAGTTCGAAATGGAGGACATCAGCGAGGGCCCAACCTCATCTCTCCTCGCTTCCTCGAGCGCTGTGAGCGAAGGCCAGGGGGAGGGCGATGCCCAAGCTTCGCTTCTCCTCATCTCTTGGAACGTCGCCGGCTGG…
Unigene73755_All	MN126091	TTCCAGTCGCCGACTCGATGTCAAGCGGGCAAAATCATGCAATGCATGCGGCTTCCCAGGCTGCCCCTGCGCAAGGTCGCATTGCTCGAAACATTCAGACAAATCCCCAAAAGTTGTCCCCGTTGAATGACCTGGTGGAGACCTTCGTGACGGGTCCTGAAAATGGTGCGCTCTCTCCTTGTTGTGCTCAAGCAGAAGTGCAGTGCGACGGCAAGAGGATTGCTGCAACCGAAAACCATGCTGAACTTCACCTTTGATCGAAAAACGTAGTCCAATTCCGACAAGAGGTCCATCGGAGTTGATGCCGCTGAAGGACTTCGGGTCGGACACCCCCAACTTCAAGTCCGAGCAGCTGGCAGCCAGGCAGCCAACACACTGCCCAGGGCCCCCGAAATCCAC…
Unigene73919_All	MN126092	GCGGGGACCGAGTGGTAACAGTGGCCAGAGTTGGAACTGGCTTTAGCATGGAGCAACTCAAAGAGATCCGGGCGAGAATCCGACCGCACTTGCGACGGTACGACCCGCATCGAGCGCCGGCCTGGCTCGGAAGCTGGCGAGGTGCAGGGAAAGCGAAGCCCGACGCAATCCTGGATTCCCCGACCCACGGCTTCGTCATGGAGATCCGTGCAGCCGAGATCGTGCCCAGCGACGACTACGAGTTCGGCCACACGCTGCGCTTCCCGCGGGCGGTGGTGCCGATACGCGAAGACAAGGACTGGTGCGACGCAGTCACAGAGTCTGACCTCCAGGAATTTCTGAAGGACGGTCGGGGTCTCCTCACGGCTCGGCGAGTGCGGACGAAGGTGGAGGTGCAAT…
Unigene77295_All	MN126093	CTACTACTACTACTACTACTACTTCTAGCCTGCTCGAGAGCCCGCAACCAATCAAGCCATGGGCTGGTGTTTAGTACAAACTGGCACTGGGAAACGTTTGTCCCTCCAACCGGGTAGCGTGCAGGTTGGACGAGCTCAAACTGCTCAGGTGAAAGCAACGCATCAGTCCGTGTCGCGCCTTCACGCAGAGATTGTAGTGGGCACTTACGAGGGACCCTTGAATGTCGTCGCAAAGCAGGAGATTCGCATCATCGACCACTCCTCCACCGGCCACGTCTTCCTGAATGGCAAAGCCTCACCCGGCAAGGGCGTCGCTCGGCCCCTCGCGGATGGTGATCTCCTCAGTTTCGGGGTGGACCCTGTGACTTACCGAGTGGCCTGGTCCCCGGTGGTCTTGAG…
Unigene77552_All	MN126094	GTTCGCTGCTATCTTCAAGGTTTTGGGGCACCTAGATAGTGTGTCGATTGAGTGGCCTCCCACGTTTTTTGTTGTGCATAGCTAGCTGTGCGAAGTTTACTTTAATCCCGTACCGAGGAATACTACGTTTATTGTTGGCCAGTTTTTTCGCGCACTCCCTTTGCTTAGAGGAGAGTGCCCCTACTGATCGGGAAGGGTCAGGGTCTGCCAGCTCCGAACACGGCGGCGGGAGGGAAGGCCCGCGCGAAGCAGGTGGGCGGGAGCATCTGGCGCGGTCCATTGGTCGCCATCACCGATGGGGAAACGAGGAGCACCAAAAGGCAAAGCGAAGGCTAAGGCTGCTGGACAGGAGCCCGCCGCAAAAAAGCGCCGCGGAGCCGCTTCGAATGCGAAGCCCGA…
Unigene77564_All	MN126095	GGTGCTGGCGCTGGCGCTGGCACTTGCACTGGCGCTGGTGCTGCTGTTGCTGCTGCTTGGGCCGACGCTCGGTCGATGGGTGCCCGGAGCTGCCCTGTTTGAGCCTGGCGTAGCATCGATGTTGACGACTCGTTGATGTGTTGGCGTGGCGCCATTGCTGCCTGCAAAACCTGGGGGTGGAGTGGTTTTTTGAGGCATCCTGTGGCTCGAGGAAGCACTGGGCTGCTGTGGGGCGGACGACGAAGATGGCACATCCACTACTTTCGCCGACATTGGAGGTCCGCGTTGCTGGCTCGCAAGCCCAGAGGGTGCTGGAGCTACTGCACTCTGCTTCGCGCCAACTGGTGCAGAGGTCGCTCCCACTGTGATCACTGGAGCTGACGGTGGTGCTGCTTTTGG…
Unigene77812_All	MN126096	CAACAGCAGCAACAACAGCAGCGAAGACAGCAGCCGCCGCTGCCTCCGCCTCCGCCCCCCCTCCCTCCTCGTCCTCTTCCTCCTCCTCCCTGCCCCTCGCCGGCCTCACGTTCGCCTTCACGGGTGAGATGGACTCCATGAACCGCGTGGACGCGGAGGAGAAGGTCAAAATCTACGGCGGCAAAGTTGCTGGCAGCGTTTCTGGCAACACGAGCTTCCTCGTGGTTGGCTCCCACCTCGAGGATGGCCGGGCGGTTGAAGAGACAGGAAAATATAGGAAATACCTCGAACTCAAGGCCAAGGGCAAGAAGTTCCCTGGACTGCTTACCGAACAAGAACTTATCGCGAAGTTTCCAGCAGCCGCCGCTCCGGCCGCGCCACCCGTGGCGGTCCCTGTCA…
Unigene82000_All	MN126097	CCGCCAACACTTCGAGCTTCGGGAAGCTGTGGAGAGCTCGTCGCGCGTTGAAGTCTCTGATGTGCTGTAGGCCTGGTCTCTTCGATTTACCCTTTCGCTTCTCCGTCGCCTGGTCGCTGCCCTCGCTGGCGCTGTCGTCCCTTTCGCTACAAGATGAAGTCGTCGTCGTGTCTTCATCGTCGAGGTCCACAATGGCGCTGGCGCTGCCCTCGATGGCCCGAATGTGGTCGGGAAGCTCGCAGATCTTCTGGCCGTACTCGGCACAGAGGCGATCCAACAACAGACAGATCCGTGAGACGTTGTTGTTCTGCGAGAGGATGAACGCGAAGACGGTCTCCACTGGGTCCTGCTGGAGCACTCTCAGGCCGGGCAGGCAGCGCGCCACTTCCCGCATGCGAG…
Unigene82709_All	MN126098	GACAACATCGGAGGGTCCCGTCTTCAACCTCGTCATGCAGCCAAAGGTCGAAAACATCAACCAGCCAGCCAAGGTCTACACGGGCCAGACAACATCAGAGGGTCCCGTCTTCAACCTCATCATGCAGCCAAAGGTCAAAGACATCAACCAGCCAGCCAAGGTCCGGCAGGGTGACGGATGGCCCTCTGCTAAGCTTTATGACGAGCCAAACGAAGTGAATAGCAAGTCCATCGAGTGTCCCAACGAAACATCTGTCATCGTTAAGTCGACTTGGTCACGCTGGGCTGAGGTCCTGCACAACGGCAGCCGCAAGTGCATCCTCTTGTCGGACCTCTCGATGTCCGTCGGTGGCAGCTCGGCCAAGCCGCAGGAAGAGTACTCGGCCCCCGTCCGAATCAC…
Unigene85095_All	MN126099	GCTGTTTTGCTGCAATCTTCTGCTCCTCGCGAAACGCGTCCATCTCCCTCAAAAGGCGCTCGGGAAGCCTGGCCCGAGCCTCAGACGAGAGCTCGGCGCCGAAGAGGAGCGAGTGGGCCCAGCCAGCAAATGTTCCAAACCGAGAGCGGAAAGCATCGCCGACCTGCTCGTAGACTTTCGGTGTGAGGGACTTCGCAAGTCGTAGCCCAGGCTCGTAGTCCCTCGTCGTGATTCGCCAGACGTGGACGTCGACGGGGATGCACTCGTGCTGTCGGAGGCAGAAGAGCGCGACGCAATCGGCCACTTTGGGGCCGATCCCAG
Unigene85214_All	MN126100	GAGCAGATCATGTCGGCCTTCAACGAATCTTCTGCATCGCGTTCACTGATCGCAACAGCTCCACCTGGGCGTCGAATCACCAAGTTCCGAATCACTTCTTCAAGGCCTTGTAAGAATGGAGGCTGGAAGGAGTTGTAGTGTTTTTTGTTCTTCAGGTTTGGCCCTTGGAAATCCTCCGAGAGAACGTGCAGGTGGAGAGGTTCCAGTGTGGGGTTCACGTGGATGCCCTGGCGCCAGGAGAGCGTCGGATTTTGGATCTGCAGCTGCTCGACGAGCCACGCCGTGTAGGCAGCCATC
Unigene89588_All	MN126101	GCGTCATCCGTTGGTAGAGGCCACCTTGAAGACGCATCGCTTCGTCCCGAACGACACCTCTCTTGGCTGCGACCAGGGCCATGTCCAGGTGGTCACGGGTGCCAACCTTGCGGGGAAGTCGGTGTACCTCAAGCAGATCGGCTTGATCGTGCTGCTTGCCCAGTTGGGAAGCTTCGTTCCCGCCGAGAGAGCCGAGCTCGGCCTCTGCGACTTCCTCTT

## Sheet: L. polyedrum DDR genes
Genes	Accession numbers	Sequences
Lp_CL1544.Contig1_All	MN125708	GCCGGCGCCGGCGCCGGCGCCGGTGTGGCCGCTGGGGTCCCCAGCGCCTTGGCTGCCGCGCCGCGGCCGCTTGCCACGACCAGCGAGGCCTGGGGCCGCTGCGGCCAACGCGTCACGGAGCCTTGGGTCCAGCAGCGGTGGGACCTCCGGGCGTGCCTGGGCCGTGGATACTTCAGCCAAGTCTGGGCCGGAGTGCACGTGCTGAGCGGCGCGCGCCGCGCGGTGAAAGCCGTGGACAAGGGCCGTTTCGCCGCCTTCCAACAGCGCAACGCCTCGCAGCTCTCCTTGAGCTGCGAGGCGGAGGTGCTCATGGGCCTCCAGCACCCCGGGATCGTTCGCATCTACGAGTGGTTCGAGACGCCGATGCATCTCTACTTGGTGATGGAGCTCGTCGAGGGA…
Lp_CL1803.Contig2_All	MN125709	CCGCGGCGGCCGCCGCGGCCGCGTCCGCCGCCGCGGCCTCCGCCGTGCTGAGGAGGCGCGCCTCCACGACGTAGCGCGCCCGCACCTGGCCAGCGTTGTAGACGACGTACTCGTTGTGCTCGAAGGCGCTACGGCCCGGCCGCGCCACGGCCGGGCCCAGCGGGACGCGGGTGCCGCACGCCAGCGTGCGGGCGCGCGCGGGGTTCGGCACCAGAGCGCCCTGGCCCAGCACCGAGCCCTGCTTGCAGTACTTGCCCGCGTCGGCCTGCGGCTGCAGGGCCTGCTGGCACTTGCCGAGCGCCACCTCTGCCAGCAACAGGAAGAGCCTGTTGCAGCCCTGCTCGCCTCCCGCGCCCGGGATGCCGCACCGCCTGGCCGCCACGCCCGCGAGGTCTGTGA…
Lp_CL2032.Contig1_All	MN125710	CTCTGGCAAAGCCGTGCACTGCAACCACCGAAGTCGTTGCAGCCCCTCTCTCTCCCACGAGGGGGCACGTTAGCAGACCCCACCCCCAGGACCCCGCTGTGCGAGGTTCGTTCCCCCAGCTCCGCAGCCTCCCTCGCAGCCTGGCCTGTAGCTGATCCCCGGGCGCAGGCCTGCTGCGAGATTGCTTGCAATCTTGCCCGCGGAGGGTGGGAGGACCTGCCCATTGACACTGGATAGACACACGACCTCGACTCCAAGCAGCCCACCTCGTCGCCACGACACCCGAAGACAAGGAAGCCCGAGAAGCCAAGAAGAATGCGCGTAGAAAGATAAACCAAGATCAGGTTGAAGGAGTGACGCACTCTTAATCCAGTGCAGCCAAGCTGCAACCACCGCTGG…
Lp_CL2032.Contig2_All	MN125711	CTCTGGCAAAGCCGTGCACTGCAACCACCGAAGTCGTTGCAGCCCCTCTCTCTCCCACGAGGGGGCACGTTAGCAGACCCCACCCCCAGGACCCCGCTGTGCGAGGTTCGTTCCCCCAGCTCCGCAGCCTCCCTCGCAGCCTGGCCTGTAGCTGATCCCCGGGCGCAGGCCTGCTGCGAGATTGCTTGCAATCTTGCCCGCGGAGGGTGGGAGGACCTGCCCATTGACACTGGATAGACACACGACCTCGACTCCAAGCAGCCCACCTCGTCGCCACGACACCCGAAGACAAGGAAGCCCGAGAAGCCAAGAAGAATGCGCGTAGAAAGATAAACCAAGATCAGGTTGAAGGAGTGACGCACTCTTAATCCAGTGCAGCCAAGCTGCAACCACCGCTGG…
Lp_CL2032.Contig3_All	MN125712	TCGGCAACAATCGATTCGCAGCCCTAGGCGAGCGGCCCCCCTGCAGGCTCAGGCGGCCTGCTCGGCCGCCAGGGCGCTCCTCACCTCCGCGAGCATCGTCCGCGCCTCCTTGGCGGCGGCGACGCCGCTGGCCTCGTCCACGTTGTACCTCACGCGCTCCGCCTCCTGCCAGACCTCCTTGGAGGCGCGGAGCTTCAGGAGCACGCGCTTCCAGAGCACCCGGCGGTTCAGCTGCGCTAGCTGGAACTCCTGTTCCGGGTCCTCGAAGAGCCTCGCGTACTCCCCGGCCTCGACGCCGAAGAACTGCCTGGCCACGTTGTCGTAGACGTTGATCTCCATCTGGTCCGTGTGGTCCATGACCTGCATCTTGCAGAGGTAGCGGTAGACCGGCTGCTGGCA…
Lp_CL2032.Contig4_All	MN125713	ATATCAATCGGCAACAATCGATTCGCAGCCCTAGGCGAGCGGCCCCCCTGCAGGCTCAGGCGGCCTGCTCGGCCGCCAGGGCGCTCCTCACCTCCGCGAGCATCGTCCGCGCCTCCTTGGCGGCGGCGACGCCGCTGGCCTCGTCCACGTTGTACCTCACGCGCTCCGCCTCCTGCCAGACCTCCTTGGAGGCGCGGAGCTTCAGGAGCACGCGCTTCCAGAGCACCCGGCGGTTCAGCTGCGCTAGCTGGAACTCCTGTTCCGGGTCCTCGAAGAGCCTCGCGTACTCCCCGGCCTCGACGCCGAAGAACTGCCTGGCCACGTTGTCGTAGACGTTGATCTCCATCTGGTCCGTGTGGTCCATGACCTGCATCTTGCAGAGGTAGCGGTAGACCGGCT…
Lp_CL2227.Contig1_All	MN125714	GGCAGGTCCAGCGCCAGCACCTCTTCGCCCGCCGGCCGCACCGCCCCCCTCCAGACCCTCCGCGCGCCGATGGCGGCCGTGGAGCAGTGCTGCATGCCCATCAGCGAGCTCTCGGCCTACACCCAGAGGTGGACGATCCGCGCGCGCGTCACGAGCAAGTCCGTGCTGCGGACCTTCTCCAAGGGCGCGAGCGGCGGCAAGGTCTTCCACGTGCACCTCCTCGACGTGCACGGGGGCGAGATCCGCGCGAGCTTCTTCAACGAGGCGGCCGACAAGCACTTCGACCTGCTGCAGCGCGGCAAGTGCTACACCCTGGCGCGCGGGAGCCTGCGCGTCGCGAACCAGCAGTTCAACCCCTGCAAGCACCGCTACGAGATCTCCTTCGACAAGCTGGCGGAG…
Lp_CL2227.Contig2_All	MN125715	CTTTGGCAGGTCCAGCGCCAGCACCTCTTCGCCCGCCGGCCGCACCGCCCCCCTCCAGACCCTCCGCGCGCCGATGGCGGCCGTGGAGCAGTGCTGCATGCCCATCAGCGAGCTCTCGGCCTACACCCAGAGGTGGACGATCCGCGCGCGCGTCACGAGCAAGTCCGTGCTGCGGACCTTCTCCAAGGGCGCGAGCGGCGGCAAGGTCTTCCACGTGCACCTCCTCGACGTGCACGGGGGCGAGATCCGCGCGAGCTTCTTCAACGAGGCGGCCGACAAGCACTTCGACCTGCTGCAGCGCGGCAAGTGCTACACCCTGGCGCGCGGGAGCCTGCGCGTCGCGAACCAGCAGTTCAACCCCTGCAAGCACCGCTACGAGATCTCCTTCGACAAGCTGGC…
Lp_CL2227.Contig3_All	MN125716	GGCACCAGTGCCAGCGCCTCCGCAAGCTCCCTGGCAACAAGGCCGTCGACGCCACGATGGCAGCCACGGAGCAGTGCTGCCTGCCTATCAGCGAGCTCTCCGCGTACACCCAGAGGTGGACGATCCGGGCGCGTGTCACCAGCAAGTCCGTGCTGCGGACCTTCGCGAAGGGCGGCGGCAGCGGCAAGGTCTTCCACGTGCACCTGCTCGACGCGCACGGGGGCGAGATCCGCGCGAGCTTCTTCAACGAGGCGGCCGACAAGCACTTTGACGCGCTGCAGCGCGGGAAGTGCTACGCCCTGAGCCGCGGCAGCGTGCGGGTCGCCAACCAGCAGTTCAACGCCTGCAAGCACCGCTACGAGCTCTCCTTCGACAGGGCGGCGGAGGTCCAGGAGGTCG…
Lp_CL2227.Contig4_All	MN125717	ATCAGCGTTAGCCTTGCGGGTTTTGCATCCCATCCCTCAGTGCCCTGATGGCGGCCCCAGAACAATGCTGCCTGCCGATCAGTGAGCTCTCTGCCTACGCCCAGAGGTGGACGATCCGGGCACGCGTCACGAGCAAGTCCGTGTTGCGGACCTTCTCGAAGGGCAGCGGCAGCGGCAAGGTCTTCCATGTGCACCTCCTCGACGTGCATGGGGGCGAGATTCGTGCGAGCTTCTTCAACGAGGCAGCCGACAAGTACTTCGAGACACTGGAAAAAGGGAGGTGCTACATGTTGAGCCGCGGAAGCTTGCGGATTGCGAACCAGCAGTTCAACTCCTGCAAGCACCGATACGAGATCACATTTGATAGAGCTGCTGAGGTCACACAGGTCGCGGACGATG…
Lp_CL2227.Contig5_All	MN125718	GCTCGAGCCCCATCGCACTTGGTGCCGGTCTCGGGAGCCTGCCCAAACCCTGCACAGAACATGGCACCCACCGGGCAGTGCTGCCTGCCTATCAGCGAGCTCTCTGCCTACGTCCAGAGGTGGACGATCCGGGCGCGCGTCACAAGCAAGTCCGTACTGAGGACCTTCTCTAAGGGCGCCGGGAACGGCAAGGTCTTCCACGTGCACCTTCTGGATGTGCACGGTGGTGAGATCCGTGCGAGCTTCTTCAATGAGGCAGCGGACAAGCTCTTCGAGACGCTTCAGGTGGGGAAGTGCTACTCGTTGAGCCGCGGCAGCGTGCGGATCGCCAACCGGCAGTTCAACCCGTGCAACCACCGCTACGAGATCTCCTTCGACAAGATGGCAGAGGTCGAGCAG…
Lp_CL2227.Contig6_All	MN125719	CTAGCATCCCCCGGGTCTTGCCGCCCCAGCCCTCAGTGTCCTGATGGTGGCCACGGAGCAGTGCTGCCTGCCTATCAGCGAGCTCTCTGCCTACGTCCAGAGGTGGACGATCCGGGCGCGCGTCACAAGCAAGTCCGTACTGAGGACCTTCTCTAAGGGCGCCGGGAACGGCAAGGTCTTCCACGTGCACCTTCTGGATGTGCACGGTGGTGAGATCCGTGCGAGCTTCTTCAATGAGGCAGCGGACAAGCTCTTCGAGACGCTTCAGGTGGGGAAGTGCTACTCGTTGAGCCGCGGCAGCGTGCGGATCGCCAACCGGCAGTTCAACCCGTGCAACCACCGCTACGAGATCTCCTTCGACAAGATGGCAGAGGTCGAGCAGGTCGCAGACGACGGCGC…
Lp_CL2227.Contig7_All	MN125720	GGACACATCGCTCGAGCCCCATCGCACTTGGTGCCGGTCTCGGGAGCCTGCCCAAACCCTGCACAGAACATGGCACCCACCGGGCAGTGCGTCATCCCGATCAGCGAGGTCTCCGCCTACGTGCAGCGGTGGACGATCCAGGCGCGCGTCACGAGCAAGTCCGTACTGAGGACCTTCTCTAAGGGCGCCGGGAACGGCAAGGTCTTCCACGTGCACCTTCTGGACGTGCACGGTGGCGAGATCCGTGCGAGCTTCTTCAATGAGGCAGCGGACAAACACTTCGAGATGCTTCAGGTGGGGAAGTGCTACTCACTGAGCCGCGGCAGCGTGCGGATCGCCAACCGGCAGTTCAACCCGTGCAACCACCGCTACGAGATCTCCTTCGACAAGATGGCGGAG…
Lp_CL2227.Contig8_All	MN125721	CACAGCGCTTGGTGCCGGTCTCCGGAGCCTGCCCAAACCCTGCACAGAACATGGCACCCACCGGGCAGTGCTTCATCCCGATCAGCGAGATCTCCGCATACGTGCAGAGGTGGACGATCCAGGCGCGCGTCACGAGCAAGTCCGTACTGAGGACCTTCTCTAAGGGCGCCGGGAACGGCAAGGTCTTCCACGTGCAACTTCTAGATGTGCACGGTGGTGAGATCCGTGCGAGCTTCTTCAATGAGGCAGCGGACAAACTCTTCGAGACGCTTCAGGTGGGGAAGTGCTACTCATTGAGCCGCGGTAGCGTGCGGATCGCCAACCGGCAGTTCAACCCGTGCAACCACCGCTACGAGATCTCCTTCGACAAGATGGCAGAGGTCGAGCAGGTCGCAGACG…
Lp_CL2227.Contig9_All	MN125722	ATCAGCGTTAGCCTTGCGGGTTTTGCATCCCATCCCTCAGTGCCCTGATGGCGGCCCCAGAACAATGCTGCCTGCCGATCAGTGAGCTCTCTGCCTACGCCCAGAGGTGGACGATCCGGGCACGCGTCACGAGCAAGTCCGTGTTGCGGACCTTCTCGAAGGGCAGCGGCAGCGGCAAGGTCTTCCATGTGCACCTCCTCGACGTGCATGGGGGCGAGATTCGTGCGAGCTTCTTCAACGAGGCAGCCGACAAGTACTTCGAGACACTGGAAAAAGGGAGGTGCTACATGTTGAGCCGCGGAAGCTTGCGGATTGCGAACCAGCAGTTCAACTCCTGCAAGCACCGATACGAGATCACATTTGATAGAGCTGCTGAGGTCACACAGGTCGCGGACGATG…
Lp_CL3145.Contig1_All	MN125723	GGGTGGGCCAGCTGCCGCGCGGAGGGCCTCCGGCGGCTCCTGCCGGCCGGCCGCACGGCTGCCCTGGGCGTCCTGAGGCCAGGGCGTGCGGCGGTCCGGCGCGGCCACGGCATGGCCCGGGCGCGCCATGCGCCGGCCGGCGGCCCGGCCTCGGGGCCCCTGGCCGCTCCTCTGCGCCCTCCTCGCTGGTCTGGCCGCCCCCCGGCCCCTGCGGCCGCTGCCAGGGAGCTCGGCGCGCTGCTGGGCCGGGGACTTCAGCTACGGCCGTTGCTGCCTGGCCGCGGACAGCGAGTGCTGGCGGGGCCCCTTCTCCCGCGAGGTCTGCTGCTCCGGGCTCCTGGAGGCCCTCCTGCAGGCGCAGGCAGAGCCCAGCAGTGAGGCGCCTGCACTCACCTGGGC…
Lp_CL3145.Contig2_All	MN125724	GGTTGCATGAGTACATCAGGCCTCTTCTCCACCCAATCACTGGGAAGGGAGGAGCGCTGAGTGCCTGCGTAGGGTCCCCATTCCCCATGCTTGCTCTTTGGGGGTGACTGGCTGGCGCCTGCACGCTCCGTGTGCGGGGCGGCGCTGGTGGTGTGCACCAGGGCTCTCGGGCGCGCGGCCCCCACGGGGCCCAGCCCGCGGGGCGGACTGCGGCCCCAGCATGCGCAAGGCCGGTTCTCCAGCCACCGCGAAGGCATTCTCCCCGGCAACCTTGCAGTCGTCGTCGCCGGGTTCACTGAAGGCTGCATCTCCTGCCTCGCAGTACGAGCGCCTGGAGTCCAACATTGGCGAAGGGACCTATGGCAAGGTGCACAAGGCGCGGGACCTGAAGACGGGGCG…
Lp_CL3145.Contig3_All	MN125725	GCTGAGTGCCTGCGTAGGGTCCCCATTCCCCATGCTTGCTCTTTGGGGGTGACTGGCTGGCGCCTGCACGCTCCGTGTGCGGGGCGGCGCTGGTGGTGTGCACCAGGGCTCTCGGGCGCGCGGCCCCCACGGGGCCCAGCCCGCGGGGCGGACTGCGGCCCCAGCATGCGCAAGGCCGGTTCTCCAGCCACCGCGAAGGCGCTCCACGGCCGCCGACCGGCCGCCGGCCGCCGCGGTGCGCGACCGGTTGCGGGGTTGCGGCCCCGGGGCCGCGGGGCGCCCGTGGCCGTCCCGACGACTGCCGCGCACGGGGCGCGGCAACCTGGCGCGCAGTCACGCGCTGCCGCCAGGCATTCTCCCCGGCAACCTTGCAGTCGTCGTCGCCGGGTTCACTGAAGG…
Lp_CL3410.Contig1_All	MN125726	CCCATCATCTGCATCTGCAACGACGCGCACAGCCAGAAGATCCGCAGCCTGGCCTTCAGCTGCTACGACCTGAAGTTCTCGCGGCCGGCGAAGGGCACGGTGGCGCAGCGTTGCGCGCAGATCGCGCAGCGCGAGGGCCTGGACGTGGAGCCCAACGCCTTGGAGGCGCTGGCGGAGTCCTGCGGCAGCGACATGCGCATGGTCCTGAACCAGATGCAGATGCTCGTGAAGTCGCCGAAGTACCAGGCGGCCGGGGTGAAGTACATGGACATGAAGCAGAAGCTCCACGAGATGTCCAAGGACCAGGCGATCATGGTGAGCACCTTCGACGCCTGCAGGAAGCTCCTCAGCACCTCCGAGGGCGCGAGGATGTCCTTCCGGGACCGCATGGACCTCTTC…
Lp_CL3410.Contig3_All	MN125727	GCGCGGGCTGATGGATGCCACACGAAGTGATCTATGCAGGAAGCTTCCGCAAGACCCCGGCGTCTTGCCCCGCCATGACCCACTTCACACCCGCGGCAGATCTCACTTTCAGGGTGCCAGGGGGGATGGAGTAGCCCTCGGCCGAGCAGGCTGTGGCAAAGGCCTCCTCGACGACCCCGTCCAGCCACGCGCTCTTGGACTTGCTCCAGACCTGCAACCGCTCGCCCTTCGCGTAGGCCAGCACCGTCTGGGCCTTGGCCTCGGCCTCGTCCTCGCGGGGCGACGGCACGAAGGACTCGACGGAGCCGCCCAGCGTGTCCCTGGCGGCCGCCTCCACTGCCGCCTCCGCGCCGGCCGCGGGCTTCTCTGGGCCGGCCTCGGCCTCCGCCCGGCCCTTCG…
Lp_CL3410.Contig5_All	MN125728	CGCGGGCCCACGCCCGCGCGGGGGGCCCGCTGCAATGCGGAGGCTGACAGGGAAGAGCGGCAGGCCAGCGCCCACCGCCGCCCCAGCGGCGGAGAGGGCCGCTGCCGCAACGCCCCCGAGGGCCGCGGAGGCCGAGGCGGTGAAGCTGAACGACGCGCCCCCGCTGAGCGAGGCGGTCGTGGTCTTCACGGGCGAGCTGGACGGCCTGACGCGCGATGACGCCGAGCACAGGGTCAAGGCCGCCGGCGCCAAGGTCATGTCCAACGTCTCGGGCAACACCACGTACCTGGTCGTGGGCTCGCACCTCGACGACGGCAGGGAGGTGGAGGAGACAGCGAAGTACAGGAAGTACATGGAGCTGCGGGACAAGGGCAAGAAGTGCCCGCTGCTTCTGCTCGA…
Lp_CL3410.Contig6_All	MN125729	TGCAGATGCAGATGATGGGGTTCCGGGTCCTCTTGATCATGCGGATCAGGGCCGCGACGCCGCCGCGGTCCCCCGCGCCCATGCCGTCGACCTCGTCCATGATGATGACGACCCGCCTCGTCAGCTTCGGCACCACCGCCTTGCCGAGGGGCCCGCTCTTGCTGTCGCTGCCGAAGGACAGCGTGCGGTTGCCAGCCACGCCGTCGGCCATCGCCTGCAGGACCTTCTGGCCTCGGGAGTCAGAGGCGTTGAACTCCAGCAGCTCGAAGGCCCCGTGCAACCGCGCCACGAGGCGGCAGGCCGTGGTCTTGCCGATGCCCGGCGGCCCG
Lp_CL3557.Contig1_All	MN125730	GCCGAGGATGGGCGTGTCGGGGCTGCTGAAGGCCTTGGGCGACGTGCAGCGTGAGGTGCACATCTCCGAGTACCGCGGCCTCGGCGTCGCCTTGGATGCCTACTGCTTCCTCCACCGGGGCAAGTACGCTTGCGCCGAGGCGCTGTTGGCCGGGAAGCCGACCACGGCCTATGTCCAGCCCGTGCTGGACGTCGTCGAGCTCTTGCGGGCGAACGGCGCAGAGCCCTTCGCAGTCTTTGACGGCGGGCCTTTGCCGGCCAAGCGCGAGGCCGAGGAGGTGCGGCGCCGAGCCCGCGAGTCCGCACAGTGGCGGGCTGGGGCTTTGCTCCGCGCAGGCGGTGGTGGCGCGCAGCAGCAGGCCGCAAAGTTCTTCAGCAGCGCAGTGGACGTGACGCCCGA…
Lp_CL3961.Contig1_All	MN125731	ACGCCGCGGCTCACGCCGCGGCCTGCACCCGCCTGCGGAAGAGGGCCCGCAGCGCCTCGGCGTCCCCGGCCGCCGCCAGGCCGGCCAGCTCCGCCGCCGCGCCGGCCTGGCCAGCCGCGCGCGGGACGGCCGCAGAGGCCTCCACGCGCTCGAACTCCGCAGACTTGGCCTGCGCCTCCTCCAGCAACTTGGCCGGCAGGCCCGCCAAACGGGCCACGTTGTGGCCATGCGAAGCGGGGCAGAGCCCTGGCAGGAAGCGGTAGAGGAAGGTCATCTCGTTCGTGCGCGCATCCACCTCCGCGGCCATGTGGAAGGGCGCCACGAGGGGTGAGGCGGCAGCCCTGCGGGAGACGGGGTGGTAGTGCGTGGCGAAGAGCACGTTGCAGCCCACACGCTCCG…
Lp_CL3961.Contig2_All	MN125732	ACGCCGCGGCTCACGCCGCGGCCTGCACCCGCCTGCGGAAGAGGGCCCGCAGCGCCTCGGCGTCCCCGGCCGCCGCCAGGCCGGCCAGCTCCGCCGCCGCGCCGGCCTGGCCAGCCGCGCGCGGGACGGCCGCAGAGGCCTCCACGCGCTCGAACTCCGCAGACTTGGCCTGCGCCTCCTCCAGCAACTTGGCCGGCAGGCCCGCCAAACGGGCCACGTTGTGGCCATGCGAAGCGGGGCAGAGCCCTGGCAGGAAGCGGTAGAGGAAGGTCATCTCGTTCGTGCGCGCATCCACCTCCGCGGCCATGTGGAAGGGCGCCACGAGGGGTGAGGCGGCAGCCCTGCGGGAGACGGGGTGGTAGTGCGTGGCGAAGAGCACGTTGCAGCCCACACGCTCCG…
Lp_CL3961.Contig3_All	MN125733	GCATGGTCTCTCAAGACGCCAGGTCCCGCGGGCCCTCAGCTCACGCGGCACTCACGGCTCCTCCCCCGCGCTGCGGAACCCCAAAGGCTGCTCGGGCCGCGCCCCCAGCGTCGTCCCGAGCAGCGCCACAGGCGCCTGTGGCTGCACGGAGGGCCCCAGAGCCTCTGGCGCGCTGCCGCCGGCCCTCAGTCAGCCAGCTCTGCGGCAAGGCGCCTCACTGAGCACCCGCTCGCGTAGAGCCCGCAACCCCACAGCGGCGCAGCTGCGGAGACGGGCTGCTGCTGCCATCCCCAGCAGCGTCGCAGGCCCACTCCGCGTCCGCTGGCGTCCCCAGCAATGTTGCGGGCCCCCCCGAGTCCGCTGCGTTCGCGCGCTGCCTTCATGCCGCCGCTGCCTGGC…
Lp_CL3961.Contig4_All	MN125734	ACGCCGCGGCTCACGCCGCGGCCTGCACCCGCCTGCGGAAGAGGGCCCGCAGCGCCTCGGCGTCCCCGGCCGCCGCCAGGCCGGCCAGCTCCGCCGCCGCGCCGGCCTGGCCAGCCGCGCGCGGGACGGCCGCAGAGGCCTCCACGCGCTCGAACTCCGCAGACTTGGCCTGCGCCTCCTCCAGCAACTTGGCCGGCAGGCCCGCCAAACGGGCCACGTTGTGGCCATGCGAAGCGGGGCAGAGCCCTGGCAGGAAGCGGTAGAGGAAGGTCATCTCGTTCGTGCGCGCATCCACCTCCGCGGCCATGTGGAAGGGCGCCACGAGGGGTGAGGCGGCAGCCCTGCGGGAGACGGGGTGGTAGTGCGTGGCGAAGAGCACGTTGCAGCCCACACGCTCCG…
Lp_CL3961.Contig5_All	MN125735	GTGCATGGTCTCTCAAGACGCCAGGTCCCGCGGGCCCTCAGCTCACGCGGCACTCACGGCTCCTCCCCCGCGCTGCGGAACCCCAAAGGCTGCTCGGGCCGCGCCCCCAGCGTCGTCCCGAGCAGCGCCACAGGCGCCTGTGGCTGCACGGAGGGCCCCAGAGCCTCTGGCGCGCTGCCGCCGGCCCTCAGTCAGCCAGCTCTGCGGCAAGGCGCCTCACTGAGCACCCGCTCGCGTAGAGCCCGCAACCCCACAGCGGCGCAGCTGCGGAGACGGGCTGCTGCTGCCATCCCCAGCAGCGTCGCAGGCCCACTCCGCGTCCGCTGGCGTCCCCAGCAATGTTGCGGGCCCCCCCGAGTCCGCTGCGTTCGCGCGCTGCCTTCATGCCGCCGCTGCCTG…
Lp_CL3961.Contig6_All	MN125736	GGCGCCTTGGACGCCCGCCGCAGCATCCCTCGCCCGCCGCGTTTGCTGCAAGGGCTCCAAGATGGCGGCGCAGTCGCCGCTGGGGCGCTTCTTCACCTCCCCGGGCGCGGGGACCGGCGGCTCCCCGCACACGCCAACGAGCCGCGCGGGCGGCGGCGCGCTGGCGCGGGCGGGGCCGGGCACGCCCCTCGCGCCCTCCTCGGCGGGCGAGGGCAGGAAGCGCGGGGCGGCCGCGCAGGCCTCGCTGTCGGACTCGAAGAAGCCCAGGGCAGCGGCGGCAGCCGCACCGGCCGCGGACGGGCCCTCGGCCGTCTGCCTGCCGGTCGTGGACGAGGCGGCCGCGGCCGCCCTGCCAGGGCCCCGCGCGGCCGCGCAGCGGCCGCGACCGGCGGACAGCAA…
Lp_CL4243.Contig1_All	MN125737	GGCGACATTCGCCTTTCCTCGAATTACAGACTTGCAGAATGCTGAGTCTTTCGAAATCACTGCAGCCTCGCCGAACAGCCCCGACGCGGCTCCCTCCCAACCCAAGCCATTGCCAAGTGAAGCTGTGTGGCCACGCCGTGGCCATCATGGCAATGATCTGAAATGCCCAAGCAGTTCCACAAGTCCGTGCCGAGGAGGATACTGACCCTAGGGGAAGGTTTTTTTAGTCATGATGTTGTAGAAGTCCTCGGGCGTAATGACACCGTCGCCATCCGAGTCGGCCCGTTCGATCATCTCCCGGAGCTCGTCCTCCGTCATGGTCTCGCCCAACTCCTTTGAAACACGCTTGAGGTTCTTCAGCGAGATGCCCCCGGTCTTGTCGTCATCAAACAGAGCAAA…
Lp_CL4243.Contig2_All	MN125738	TCTAAAGAGGCCAGCAGCCTCCGCGCGCCACCACGGCTGCCCTGCAGTTCGGCGGGCGCCTACGACGCCCAATAGCTTACGGGAAGGTCTTCTTCGTCATGATCTGGTAGAAGTCCTCGGCTGTGATGGCACCGTCCCCATTTGAGTCCGCCCGCTCGATCATCTCCCGTAACTCCTCCTCGGTCATCGTCTCTCCGAGCTCCTTGGACACGCGCTTCAGGTTCTTCAGAGTGATCGTCCCCGTTTTGTCGTCGTCGAAGAGGTTGAATATCTTCTGAATGCCATCGCGGGACTCCTTGTCGCCCAGCTTCTGTGTGATGGCATCGAGAAAGTCTTCGAACCCGATGTGCTGACCGTCGTGGCCCAGGTCTGCGATCATCTGGAATATCGTGGGGTTCT…
Lp_CL4243.Contig3_All	MN125739	CTCAGTTGCGCCAGCACGGTGTCGCGGCCACGTCAGCTCCGACAGGCTCAGGCCAGGCTGTGCCAGCCATCTCGGCGCTCATGCGAGGCGTCGCCGCTGTGAGCTCCACAGAAAGTCTGGCTCGGGGAAGTGTGCCACGCCAGTGTGCGGCGCGCTCTGAAGAGTATCGCCCGGCCATGCGGCGTGGCGAGCGCCGCCCCCGCGGCTAGGGCAACCTCTGGCACCCGACCACGGCTCCACGCCGTGGCCATCATGGCAATGATCTGAAATGCCCAAGCAGTTCCACAAGTCCGTGCCGAGGAGGATACTGACCCTAGGGGAAGGTTTTTTTAGTCATGATGTTGTAGAAGTCCTCGGGCGTAATGACACCGTCGCCATCCGAGTCGGCCCGTTCGATCA…
Lp_CL4311.Contig2_All	MN125740	CGTCACCGTCGTCACCGTCAGCGCCGTCAGCAGGGCTCCTCGAGGGCCGCTGCGGCCGGCCCCGCCGCACTGCAGAATCCTTTGTCTGCCGGCCGCGCCCCGCGGCCGCGCTGTCACAGCACGACCGGGGGCAGCTGGCTCTGGGAGTCCAGCGGCTGCGAGCAGAAGACCTCCGCCAGCGGCGGCCCGGCGGCCGGCACCCAGGTGGAGACCGGCACGATGGCCGCGCGCGCGGGCAGCTGCTGCTGGCCAGGCGCCTTGCGGAAGAGCTTGAAGTTCCGCCGCCCCACGCCGGCCTTGCAGGCCTGCGCCGCGGCCTGGCCGCGCGCCTGCGCGCCGGCCGTCCCCCTGCCGGCCGGCACCTCCAGGCTCGGGCTCCAGGCGGCCCTGGGCACGTCC…
Lp_CL4955.Contig1_All	MN125741	CAACTGGCCGCCTACCGTCCCGGAGCAAGAGACTCAACATACGTCAGGTTTCCCTGTGGTAAATCCTTGGAAGACAATGCATAAACCCGCGGTGCTTCTGATATCTTTCCCACGGCTGAGCCTCTTTGTCAACTTGCACGATCTGCGTCTCAATTCTAGAACTTCGGCAACAGCTCAATGTGGTACATCGAACCCGCGCCAAACAAGATGTGCCCTTGACGACGGGGTACCACTTTCGGCAACATCCTGCTTTGCCAGTCCGTCGTACAGCCCAGAGTCGTGTTGCCGATCAGCAGGTTGCAAGCACCTGCTGCCGGCAGAGTGGGTCGCCATGCGCGGTGCTGGGGTGGCCAGCCTGGGCAGCGGTGGTGTCCGCCTGGTCTCAACGGAGCCTGTAGG…
Lp_CL4955.Contig2_All	MN125742	AACTGGCCGCCTACCGTCCCGGAGCAAGAGACTCAACATACGTCAGGTTTCCCTGTGGTAAATCCTTGGAAGACAATGCATAAACCCGCGGTGCTTCTGATATCTTTCCCACGGCTGAGCCTCTTTGTCAACTTGCACGATCTGCGTCTCAATTCTAGAACTTCGGCAACAGCTCAATGTGGTACATCGAACCCGCGCCAAACAAGATGTGCCCTTGACGACGGGGTACCACTTTCGGCAACATCCTGCTTTGCCAGTCCGTCGTACAGCCCAGAGTCGTGTTGCCGATCAGCAGGTTGCAAGCACCTGGTCTCAACGGAGCCTGTAGGCCGCCCTCCGTAGTTCCTGTGTGCAGGCAGCCTCGCGTAAGAGCTCCACGTCGTACACCTCGTGCGCCTT…
Lp_CL6060.Contig1_All	MN125743	GCGGCGGCGCCGCCGCCGCGGCGCGGGCCTGGCCCGGCGGCTTCGGGCCCGTGCTGGACGTGCCGGAGTGCGACTCCGAGGACGACGAGGCGCCCAAGGAGCGGAGGCCCCCGGGACGGGCGGCGCAGCCGCCGCTCCGCGGCCCGCCCGCGGTGCAGAAGGCGCCCCCCGAGGAGCTCGTCGAGGTGCCGGGCTCCAAGCAGCCGGCGCCGGCGGGCCCGGCCGCGCCGGCGCTGCGGCTGCCCAAGCGGCTCCACGAGCACCTCCGGGGCTACCAGCGCGAGGGCGTGGCCTGGATGTGGCGCCTCTACCACGCGCGGGCCGGCGGCGTCCTGGCCGACGACATGGGGCTCGGCAAGACGGTGCAGTCCTGCGGCTTCCTGCGGGCGGTCCGCGCGG…
Lp_CL6060.Contig2_All	MN125744	CCTGTCATTCGACTATGCTGAGCTCATGGAGGCCCGGTCCCTGAAGGCAGGTCGGCCCAGAGGCCGCCGGGGCTGCGGCTACTCGCCCTCCGGCCGCGGCTTCCTCTTGGACTCGTAGGCCTCCACCACCTGGTTGGCGTCGTACTCCTCGTCCCTCAGCGCCTGGAGGGCCTCGATGGCCTTCTGCTGCTCCTCGGCCGAGGCCCTGGACACCGCCACCTCCTCCTTGGCGCCGTCGCCCGTCCTCGCGTAGTGCTTGTAGAGGGCCTCCCGCCCGGCCGTGGCCTCCCTCTCGGCGACCCGCGCGGACTTCAGGCGCTGCTTGGCCTCGCTGAGCGCCTCCCTGAGCTCCTCGCGCCTCCTCTTCTGCCCCGCCTCCTGCTCCCCCGCCGCAGCGCA…
Lp_CL6472.Contig2_All	MN125745	GCGACCGAGGCTGTACAGCGTGCTCCCCGCACGAGTACGACATTGAGCACCACGAGCCGGTGCAGAGGCTTCAGCATGCTTGCCGGCAGAAAGCCAACAGCTTCCTCTGCTCCCCCAGCGTTGAGATCACTTCGGGGCCAGCCTGCATGGCAGCCGGAGTCCACAAGCTACGCCCTTCAGAAGGCCCGGCGCCTCCTGAGCACGTCTCCCCTGGCTTGTGCCGGCCGCGCTGCAGGCCGCAGCCCTGCCCCGCAGATCTGCGCCCCTGCCCGCCTCAGACGCACTGGAAGTGCCCGTCGTCGATGGTGGTGTAGACCTCGCCGTCGTTCACGAGCAGCTCCAGGGCAGCGCTCACCTCGTCTGCTGGCGCCGGGTCCGCGTGGTTGCAGATGGCCGCCA…
Lp_CL6472.Contig5_All	MN125746	GTGGAGAATGCCAAGGACACGGACAAGGATGAAGGGCAAGCCGCCTCAGACGACCTGGAAGTGCCCATCGTCGATGGTCGTGTAGATCTCGCCGTCGTTCACGAGCAACTCCAGGGCGGCGCTCACCTCGTCCGCCGGCGCCGGGTCCGCATGGCCGCACAGAGCCGCGAAGGACACGCCCTCCGGCCGCCCGTCGCCCTCCTTCTGGAGGAAGGCGAAGATCGCCTTGCGGAGGCCGTCGCCGGACAAGGCGGCCTTCGGCGCGGCCGGCACCGCCGCCGGCGCCACCTCCGCCGGGGGCCTCTCCAGCTTCGGGGGCGAGACGTCCATGGCGGCCGCGTCGGCCGTCCGCGCGGAGGCCGGCGGCTTCGACGGCGTCTTGGGCTCCAGGTGCCGCCT…
Lp_CL6472.Contig6_All	MN125747	ATGACGCAAGCTCGAGCGTAGCAAGGCTGCACAAACAGCGCCGCATGCCGAGGGTCCGCCCCTTCGGCGTGCGACCCCCCGCGTTTGTGCCGGCAGCCGCTCACCCCGCGAGCCTGCTGCCCGCCTGCAACCCCGGTTGGCAGCTTCAGACGCACTGGAAGTGGCCGTCGTCGATGGTCGTGTAGACCTCGCCGTCGTTCACCAGCAGCTCGAGGATGGCGGCCACTTCCTCCGAGGGCGCCGGGGCCACGTGCTTGCACACGGCATCGAAGGACACGCCCTCTGGCCGGCCGTCGCCCTCTTTCGACAGGCAGGCAAAGACGGCCTTCCGCAGGTCCTCGCCCGACAACGCAAAGCCCGGCTTGGCCGCCTCCACGGCCGGGGCCTCCGGCGCCGCCG…
Lp_CL7119.Contig1_All	MN125748	CCAAGCTGACCAGGGCCAGGGCGGGCCACGCGCGCACGGGGGCTAGCGTGCCGCAGGGCCAGCCGGCGGTGGCAAGGCGCAGCCCGCAGCCGCGCCAGCCTCGCCCATGGCGGGCCGCTCGGGCGGGGCCTACATCAACGGTCGCTACGTGTCCAACGCCGGCAAGGGCGGCGGCCGGGGCGGCGGCGGGGGCCGAGGCCGCGACGAGTCCGGCCGCACCGTGGGCTTTTCCGGCGGGGGGGAGAGGAAGGAGTACGAGCGGAAGCCGGGCGACGAGGACGTGAACCTCGAGCGGAAGTTCGACATCGACATCCTGCAGCCGGGGGAGACGCGCGTGGGCTACCTCTTCAACATGAAGCAGACGCGGCACTATGACGAGGGCGGCCGGTCCCTCACCGG…
Lp_CL7119.Contig2_All	MN125749	GTGAGGGCGCGGTGCTGCGCGCACCGGGCCCCGGGGAAAAAAAAGAGAGCGCCTGCCGCCGCTAGGGCACGGTGCTGCGCGCGCCTGGCCCCGGGAATCGGCGGGGGCGCCCCCGGCCGCGGCGCGCCTCCTCCTCCCCCGCAGGGGGCGGCGGCCGGGGCGGCGGCGGGGGCCGAGGCCGCGACGAGTCCGGCCGCACCGTGGGCTTTTCCGGCGGGGGGGAGAGGAAGGAGTACGAGCGGAAGCCGGGCGACGAGGACGTGAACCTCGAGCGGAAGTTCGACATCGACATCCTGCAGCCGGGGGAGACGCGCGTGGGCTACCTCTTCAACATGAAGCAGACGCGGCACTATGACGAGGGCGGCCGGTCCCTCACCGGCCTGCTGCTCTACCTGCTGC…
Lp_CL7915.Contig1_All	MN125750	CGACCGCTGAGAGTGTGGGAACGAGTCGAGCGGCCCAAAACGGCCACAGCCTGTGCGCACGCGGGCACGCTCCCGTGCGGCCTTTGCCCTCGGCTCAATGCATCCTGCGCGGCCAGCCACCCGAAGTCCACTGGCTCACTGCGCAGGGGCAGGCTGGGCCGCGAGTGCACACGTGCCTGGCCCCTGAGCCTGTCTGGACCTCCGCCCTCGGCACCAAGAGTCAATCTTCGGCACTCTCGAAGAGGTAGTTGGCCGCAAGCTCCTCGTTCCGCTCGCACGCGAGGAATGCCTCAAGGGCAACGATGCGGTCAAAACCCAGAGCTTGGAGCCGTCCGACTGCCTCCTGCTCGGCCGCTGAGAGCTGCACCGCCGGCGCCGCGGCCGCCGGCCCCGCGGCTG…
Lp_CL7915.Contig2_All	MN125751	CGCTGAGAGTGTGGGAACGAGTCGAGCGGCCCAAAACGGCCACAGCCTGTGCGCACGCGGGCACGCTCCCGTGCGGCCTTTGCCCTCGGCTCAATGCATCCTGCGCGGCCAGCCACCCGAAGTCCACTGGCTCACTGCGCAGGGGCAGGCTGGGCCGCGAGTGCACACGTGCCTGGCCCCTGAGCCTGTCTGGACCTCCGCCCTCGGCACCAAGAGTCAATCTTCGGCACTCTCGAAGAGGTAGTTGGCCGCAAGCTCCTCGTTCCGCTCGCACGCGAGGAATGCCTCAAGGGCAACGATGCGGTCAAAACCCAGAGCTTGGAGCCGTCCGACTGCCTCCTGCTCGGCCGCTGAGAGCTGCACCGCCGGCGCCGCGGCCGCCGGCCCCGCGGCTGCCGG…
Lp_CL8189.Contig1_All	MN125752	TCTGCAACTGACACGTCCGCCTCGCCCTCGGGCAGGGCAGCCGCGGCGATGGCCTGCAGCACCGGCCGCGAGCGCAGCAGGTGCTGGCCCAGCGGCGGCGGCGCCGCCGGCCCCGTTCTGCGCGGGCACGACAGCCACGATCTCCGCGTCCACCACGAAGGCACGGCCGCTCGGGCCGCAGCGGCGGACGGCGGCCACGACGTCGGGGTACTTGTAGGTGATGTCGTCGATCTTCCGCGAGTAGATCCGAACCTGTCCGGAGTCGGTCTGGTGGATCTGCGCTCGCTGGCCGTCGTATTTGTGCTCCGCGATGAGGCGCAAGGTGCCCTCCGGGGGCTCGTTGGGCAGCGCCCCGGCGATGCGGTTGAGGAGCTCCTCGACCGACGTCGCCGGCTTCGC…
Lp_CL8189.Contig2_All	MN125753	AGTCCTTCTTGAGCTTCAGCCAGCAGTCGGACCGCTTCGTGGACGGCTCGTAGGGCGCGTCCAGGCGCTTCACCATGAGCCCCTCACAGCCGTCAGCTAGGGACCGCTGCATAGCCTGGGTCAGCCGCTCCCGCGCGGCGGCGTCCTCAGTGGGGGCCTGGCCCAGGCTGACGTCCACGGTGGCCGCCTCGCCAAAGGCCAAGACGTCCCGCTCCTCGGTGAACATCCGGCGCAGGGCCTCGCGGCGCTCCGCGAGGGGCCTCCGCAGCAGCGGCGCCTCGCCGAGGAGCAGGAGGTCGAAGAGGAAGAGCTTCACGGCCACCGAGGCGTCGGCCGCGCCGGCCTCCGTGACGTTCTTCCGCTTCCGCGTGGAGAGCGACTGGAAGGCCGCGATGCCCA…
Lp_CL8817.Contig2_All	MN125754	GGCTTTTCCGCTTCGCGTCCACACGCTGCCGCCTCCGCGGCCAACAGCCGCCTCCGCGGCCGACAAGCGCCCGACGGGCCGCGGCCCGTCAGTCGACGATGACGCTCTCTTTCCGCGGCGCAGGAACTTCCGCAGCCGGGGCCGGGGCCGGGGCCGACGAGGCGCCCGCCGCCTGCCTGCACGTCGTCAGCTGGAACGTCGCGGGCTGGAAGACCACCGTGGAGCACATCCGGCGGTTCAAGGGCGGCCTGCCCACCTTCCTGGAGCGCCACTGCGCGGACATCCTCTGCCTGCAGGAGGTGAAACTCACGGCCAAGGCCATCACCGAGGACAGGAGAACCCTAGGCGTGGAGACCCCAGGCTACGAGAGCTTCTGGGCTTGCAATGAGGGCTCCGGCG…
Lp_CL8837.Contig2_All	MN125755	CGGGCGGCGCCTCGCGCGTCCAGGGGCCAGGATTGTCCGTGGAGCGGCCCCAGCGCTCCTTCGCTGGGCCAAGACGTGGGCGCTCACGTTTTCCATCCGCCGAGGGGCGGCCTTCGTGCCGGGCGCCACCCCGCCGCTCGTGGCGCTGCGCCCGCCGCTCACGGGCGCGGGCGCATGGGGCCGGAGGGCCGGGCAGCGGCCCTACGGCGGCCACGCCCGCTCGCCGCCGTGGCCGTCCTGGCTCCTCGCAGCGACGCCGGCCGTCCTCCGCCTGCCGCCGCGTAGGGCCCGCACCCGGACTCGCAAGATGCCCGAGGCCGAGACGGCGCCAACGCCGGCCAAGCGTGGGCGTGGCCGGCCCAAGAAGGCGGCGTCCACGGCGTCCCTGGCCGAGGGCCC…
Lp_CL9519.Contig1_All	MN125756	CTCAAGGCCACCAAGCTGTGAGTCACGGCATGCGTTGTCCGATGGCACTTCCCGATGACGTCTAAGAGGCCACCGCCGCAAAGCATAGCACAGGGGTTTGTCAAGCTTTTCACACCAGCGACGCGTTGTCGAGCTATCCCCGGCACGGGCGTGCTCGCCATCAGCGACTCGGATGCCGAGGTGGAGGTGCTGTCAGACGCCTCGCAGGAGCTGCGAAGAGGAGGGGAAGCCGCACAGCCCGTCGCATGCGCTGCCTCAGATGGACCCGTGGCCGCGGAGCCTGGCGCGCAAGGGGGCGATGCTGGGATCGGCACTGGCGACTCTGGCGGGGATGGTTCCAAAGGCGGCGCTGTGCCAGAGGACGATGCTCCGGTCGCCGCGGCGGGCGCGGATGTTGCC…
Lp_CL9592.Contig1_All	MN125757	AAGGCTCAGCGCGGTGCGAGCACTTGTCCGCTGGGCCTAGGCGCGCCGCCCCGGGGCGCCGGGGCAGCCGCGGCCATGTGGGGCGATTCACCCTCCTGCTGCGGTGCTGCTGGAGGGTGCATGGAGTGCGGTTGCTGCGGGAGCTGGGTCGTCGGCTCGGCGCCGGCAGGGCCACTCGCACGCCGTCGTCATGGGTGTGAACCAGGACGCTTGCGACCTCTCGTTGCCTTGCATCTCTTGCCGATCGTGCGCCTTGTGCGGCTGGGCTCCGGCCGTGCAGGTGGTGCGCGATGCCCTTGGCAGTTGGTGTGGGCTGGTGGCAACGGCTCACGCAACGTCGCCTTCGCAGGCCCCAGGCGGCAGCGCTGCGGGGAGGGGCGCTGTGTATGTGTGCGAATG…
Lp_CL9761.Contig1_All	MN125758	CGAGCCATGCCCCTCGAATCTGATAGCGGAAGCCTGGCCTGAGACCGAGATCCCCGAGGCTACCAGTGCCCAGGCGGCATGGGCCTCCTCACGCCTGCGCCCAGCGTGCTGGGCGCTTGCTCGTTGACCGCCGCAGTGGAGCTCGTTTGCGCGGTGCACCTCGCCATCTGCGTCGGCATCATATCCAGTGTCTCCTCGGAGCACTCTGTGGTAAGCGCTGGCGTGGAGATCTCGCCGGTCTTCCAGTGCATCACTGCGGCCTGGTGCCTCCTGGGCATCCCCCTGATCATCCATGGAGGCGTCGGCGCGGTGTACTACGTGGAAGCGCACCTCTTCTACTATTTGCTCTACTTGGCCGGCACGCTGGCCTGGGCCGTCGCGTGGGTCGCGGTCTTCGTG…
Lp_CL9761.Contig2_All	MN125759	GGCCAATCGATGTGATTGCACACCCAGCGAGCACGCAGCTCTCCCTGCGGAGGCTCAGCGCTGAGCCGCCGCCCCGGACCCCAGGCCGCGCGCGCGCTCGCGCGGCCGGCAGCGGCTGCCCCCCTGCAGCCGCCGGCCGCGCGCCGCTGCGCCGGCGGCTCACCACGGCCGCCCGCCGGGCGGGCCAGCCTGCTGCGGCGCGCCGCCGAAGAGCGCGCCGCCGCCGTAGGCCCCGGCGCCGCCGGCCTGCGGCGGGGGCGCGCTGTAGGGGTTTGCACCAGTCGGCGGCGCCGCCCCGCCGTACGGCCCGCCAGCAGGGGCCCCACCGTAGGGGTTCGCCGAGCCGCCCTGCGGCTGCACAGCGCCGGCGGGCCCGCCGTAAGGCCCGCCGTAGGCGGC…
Lp_CL11756.Contig2_All	MN125760	GGCTCAAGTGCCCGCTCTCCACCAGGGACCTCAGCGCAGCTCCTGCCAAGCGCTGGCAGCGGACATGCCCGGCTTCAGTTTCGAGTGCGAGTATGCGAAGAGCGCCCGGGCCACGTGCAAGCAGTGCAAGGAGAAGATCGACAAGGGGGCGCTCCGCTTGGGCCTCAAGGTCGTGGCCAGCCTGGACGGGGAGGAGGACGCGGCCGCCCGCCAGCAGGCACATGCAGCGGAGTCCACGAAGTGGCACCACGCCGACTGCTTCCCGCAGGTCCGCGGGGCCGCGTGGTTCCGGAAGCACCTGCCGGAGAGCGTGGAGACCTGCGCCGGCTTTGGCGACCTGGCCGAGGCCGACAGGGCGAGGGTAGTGGCACTCTTCGCCACCTGCCGTGGGGCGGCGCC…
Lp_CL11756.Contig3_All	MN125761	TTCGGCTCCAGGGGTGCTTTCCGCTTGCGGCCTGCGTAGTTCCTGCCGAGTGTTGGCAGTGGACATGCCCGGCTTCGGCTTCGAGTGCGAGTACGCGAAGAGCGCCCGGTCCACGTGCAAGCAGTGCAAGGAGAAGATCGACAAGGGGGCGCTCCGTCTGGGCCTCAAGGTCGTGGCCAGTCTGGACGGGGAGGCCGACGCGGGCGCCCGCCAGCAGGCGCATGCGGCGGAGTCCACGAAGTGGCACCATGCCGACTGCTTCCCGGAGGTCCGCGGGGCCGCATGGTTCCGAAAGCACCTGCCGGAGAACGTGGAAGCCTGTGCCGGCTTCAGCGACCTGGTCGAGGCCGACAGGGAGAGGATTGTGGCGCTCTTCGCCACCTGCCGCGGGGCGGCGCC…
Lp_CL12386.Contig1_All	MN125762	GGGAAAACGCAGTGTGCGCTCGTGCTCCCCGAACCCGGCGTCAGCCGCCTGCATCTGCAACGCCGTCCTGCTCCGGCCAATAATCATCACGCAAGCTCCATGTCCCGATTGCACTGTTCTCTTTTGGCTTGGAGAGTTTACACAGCCGCTTGAGCAAGGACTTGAAGATGTCCCGCCGCTCCGCCCCGTAGCCCGCGGCCACGTGCTGCAGCACCTGCTCTGTGCTGAGGCAGTGGTCCGGGCCCGCGATGTCGGGGTTGAGGAAGGCCCTAAGGATGGCCTCCGCCACCGACCGATGGGTGCTCGTGAATGACCCGTCCGCTGCCGCCGCGAGGCGCTGAAGGGCCTCCCGAAGGCCGGCCACTGCCGGGGCTTTCGTCCTCTTGGAGGGCTTGTCCC…
Lp_CL12386.Contig2_All	MN125763	TACCGGACTACGGGAAAACGCAGTGTGCGCTCGTGCTCCCCGAACCCGGCGTCAGCCGCCTGCATCTGCAACGCCGTCCTGCTCCGGCCAATAATCATCACGCAAGCTCCATGTCCCGATTGCACTGTTCTCTTTTGGCTTGGAGAGTTTACACAGCCGCTTGAGCAAGGACTTGAAGATGTCCCGCCGCTCCGCCCCGTAGCCCGCGGCCACGTGCTGCAGCACCTGCTCTGTGCTGAGGCAGTGGTCCGGGCCCGCGATGTCGGGGTTGAGGAAGGCCCTAAGGATGGCCTCCGCCACCGACCGATGGGTGCTCGTGAATGACCCGTCCGCTGCCGCCGCGAGGCGCTGAAGGGCCTCCCGAAGGCCGGCCACTGCCGGGGCTTTCGTCCTCTTGGA…
Lp_CL12602.Contig1_All	MN125764	CCTCGTCGGCCCACTGGAAGAAGCCGCAGATGCCCCGCGCGCAGCGCAGGAAGGGCCGGCCCTGGTTGGGCCCGGGCTTGCTGGCGCTCTGCTGCGCGCTGGGGGCGCCGCAGCCGCAGGGCGGGCCCGGCTCCGCCGGGGCCTCCTCGTCGGCCCACTGGAAGAGGCCGCAGAGCTTCCTCGCAGCCGCACGGCGGCCCGTCCGCCTGCTGCGGCTCCTCGTCAGCCCACTGAAAGAAGCCACAGGCCCTCTGGGTGCAGCGGAAGAAAGGCCTGCCTTGGTTAGGGCCCTCCTTGCCCACAACCATCTGGACGCTGAGCACCCCACAACCGCACGGCGGGCCGTCACCCTGCTGCGGCTCCTGGTCGGCCCACTGGAAGAAACCGCAGGCCCTCTGC…
Lp_CL12947.Contig2_All	MN125765	GGCCGCCGGCGCTGCGGCTGCGGTGGCCGCCGGCCAAGCGGCTGCAGCGGTCGCCGGCCAAGGCACGCGCGCGGCCGCCGCCTGCGCTGGCGCGGCCAGCCTCAGGGCTGCAGTGCGGGCCGGCTGAGGCGGCTGCGCGGCTACAGGTCCGGCTGCTGGCCCGGCCGCTCGCGCGGCCGCGGGCGCCGCAACTGGCAGTGCGGTCGGAACGCCCGCCGGCACGGCGGCCGGCGCGGCCGACCGCACCACCGCAGCCCTGGCTGAGGCTGGGGCTGTAGCCGGGGTTGCTGGCGGGGCCGCCGCCGGCGCTGCGGCCGGGGCTGCCGGCAGTGCCGCCGCCGGAGCTGGAGCCGCGGCCGCGGCTACCGCTGGGGCTGCCCTTGGCGGCGCCGGCCGGGC…
Lp_CL12947.Contig3_All	MN125766	CGGGCGTGTCGGTCTCCTCGCCGACGTCCCGCGGAGGGCCGTCCAGCCCGGGCGCCCCTCCTCTGGCGCCTGCCCGCCCCGCGCGCGCGCGGGCCATGGCCTCCCTGGACTTTGCCGCGCTGCTGCGCGAGGAGCGGCGCAGGCGCAGCAGCGCCGCGGCGGCGCCGCCGCCGGCGCTGCTCGCCGAGCGCGCGGCCCTGGACCTGGAGGCCCACCGCGTGGGCGCCGAGCAGGGGCTCGCGGACTGCTTCTACGTGCAGGACTTCCTGGCGCCGGAGGAGGCGGAGGCCTTGAATGCGGCAGCTACGCAGGTGGAGGCCGGCAGCGGCTGGGCCTCGCTCCCCGGCCGGCGGCTGCTGAACCTCGGCGGCGTGCCGCACGCCTCCGGCATGTTCGTGG…
Lp_CL12947.Contig4_All	MN125767	GGCCTCGGGGGCCTCGGGGGCCTCGGGGGCCTCGGGGGCCTCGGGGGCCTCAGGGCCTCGGCCGAGGACAGGCCCGCGCCCGCGCAGCCCGCGGGGACGTGCGCCGCCGACAGGGAGCCGCCCGCGCCCGTGCCGGCACCCTCCGGCGAGGAGAGGCCCAGCGCCGTGCGGCAGTTCCGGGCCCCGACGCCTGGCACGGCCGGCTCGGGCCTGCGGGGCAAGACCTTCGGCGTCAGGCCGCGGGCGGGCGACGAGGGCGGCGCCGAGGGCGACCGGCCCCGGCAGTTCAGGCCCACCTTGGTGCGCTCGGCGGGCCGGGAGCTCCTGCAGGGCGCGCTCCGCGACGGCGCGGCCGGCGCCGGCCTCGAGGCGCCCAGCGACGACTCGCCCAACCGCCTG…
Lp_CL13062.Contig1_All	MN125768	CAGGGCAGGGCAAGGCGGCCGCGGGGGCCTGCGGCCCGCGGCGCCATGGTGTCGCTCACCGTGCGGCCCCTGAGGAGTGAGGCCTTCGAGGTGCAGGCGGAGTTGGAGGCGCCCGTGGCAGCGCTGAAGGCGGCCATCGCTGCGCAGAGGCCGGAGCTCCCGGCAGCGCAGCAGAAGCTGGTCTACAGCGGCCGCATCCTCGCGGACGACGTGCCGTTGCAGGCTTACGGCCTGAAGGCCGGCGACGTCGTCGTGGTGATGCTCGTGAAGGCGACGCCGGCTGCGTCAGAAGCCGGGGCCGCGCACGCGCCCACCGCACCGGCGGCTGCGCAAGCCGCACCGGCCGGGGCAGCTGCCGCTGGGGCGGCCTCGGGTCCCGCGGCCGCCTCCGCCCCCGGC…
Lp_CL13062.Contig2_All	MN125769	TGCCTGCCTGCCTGCCTGCCTGCAGGCAGGGCAGGGCAGGGCAGGGCAAGGCGGCCGCGGGGGCCTGCGGCCCGCGGCGCCATGGTGTCGCTCACCGTGCGGCCCCTGAGGAGTGAGGCCTTCGAGGTGCAGGCGGAGTTGGAGGCGCCCGTGGCAGCGCTGAAGGCGGCCATCGCTGCGCAGAGGCCGGAGCTCCCGGCAGCGCAGCAGAAGCTGGTCTACAGCGGCCGCATCCTCGCGGACGACGTGCCGTTGCAGGCTTACGGCCTGAAGGCCGGCGACGTCGTCGTGGTGATGCTCGTGAAGGCGACGCCGGCTGCGTCAGAAGCCGGGGCCGCGCACGCGCCCACCGCACCGGCGGCTGCGCAAGCCGCACCGGCCGGGGCAGCTGCCGCTGGG…
Lp_CL13190.Contig3_All	MN125770	GCCAGCCAGCCAGCCAGCCAGTCCGCCCGCCGCCCCCCGGCCGCCTCACATCGTGCAGCACTGCTGCTCCCGGCCCTCGGCCTCCGAGTCGGAGGACGAGCGGCCCTCCTCCTCGGAGTCGGAGCCGTCGCCCGCGCCGCAGAACCACCAGGCCGAGGAGGACGTGGGCGGGTGCAGGCTTGCGAGCTTGCCGCGGCCGCCGTCCACGCCCGCGGCGTAGCTCCGGAGAAAGGCACCGGCGCAACGCTCGCCGGCCAGCTTCTCCATGGCCCGGGCAAAGCCTTCCGCGTCGTCTTGCGGGCCGCCCGCGCCTGTGCCGCCGAGCTCGGCGACGCCCAGGGCGCCCGAGGCCTCGTCGTAGAGCACGTGGTCGGGGTGGAGGACCCCGAGGCGCGCGGT…
Lp_CL13254.Contig1_All	MN125771	GAAGGACCAAGCCCCCCCTCGCCCCCCCTGGCTCGCCTGCCCAGGCCGTCCCGCCCCCGCCATGGCTGCAGCCTTCGCGGAGCTCCTGCCCCTGGCCTCGCGGCCACCGGCTGCGCGGCCGGCCGCTCTGCGGCCCGCCGCCTGCCGCAGGGGCCTCGCGGCCACGGCCATGGCCGCGGCGCCGCGCGGGGCCGCGGCCGGGCGGGCGCAGGAGGCGGAGAGGCACCGCGTGACAGAGCAATGGGTGCAGAAGAACTGGGACGTGCGCACAGTCCTCGGCAGCGGCAACTTTAGCGAGGTCCGCTTGGGCGTGCATGTGCAGAAGGGCGAGAAGAAGGCCGTGAAGATCATCGACAAAAAGAAGTTTGTGCAGTTCCAAAGCAAGCGGGAGTCCCACCT…
Lp_CL13972.Contig1_All	MN125772	AACACGAGCACTAAAACAGCACCCCCAAAACATGCCTTGTAGAGGTTCGACTGTCTGCAAATACGCAGCTGCTCAGCCTCCCCGCAGCCTCAGTAGGCATCAGTGATGCCGCCTGTGGCTATGGCAAAGAGGGCTTCGCCCTCAGGCAGGCTCGGGGAGTCGTGCAACCTGCAGATGCGGCTGGTGCCATGGCCTTTGCGGAAGAACAGCCGTGTCTGGCTGGCATGGCCCATGACGCTGCCGCCAACGGCCGCCACCTGCTGGCCGGCCACGTCGGTCTTGCCTCCGGCCGTGCCCATGACCTGGTTTGTGACCAACACGGCCACGCCGTGCTCGTCGGCGATGCGCTGCAACTTCCGAAGGAAGCCATTCAACGCACGCTGGCGTTCGGACAGCTCG…
Lp_CL13972.Contig3_All	MN125773	CTGAGCCATTTTGGGACGAGAGGTGAAGGTGGGGTTGGGGAGGTTGCGGTGGGCCTGCCCCGCCAGTGGCAATCATGGCGGAGCAGGCCCCACGGCCGAAGCGGGCGCGCCGCGAGGCGGCAGCTGGAGGCCATGAGGTTCAGGAGCAGGTGGTGCAGGCGGAGCAGGCCCAGGGCCAGCAAGAACTTGTCGAGGCGGGCGATGCCCAGTGCCCTTCTGATGAGCCAGGCATCACAAAGCTCGAGCGCCTCTGCGCCGGCCCGGAGCACCAGGGGGCCGGGCTCTCGAAGGCCGACTTGAACGCCTTGCTCGAACACGGCATCCACTGCGTTGAGACCATAGCCTTCATGCCGGTGCGGAAGCTGACCGAGGTGAAGGGCATCGGGGACCAGAAGGCGC…
Lp_CL13972.Contig4_All	MN125774	TGTCGCATCGCACCCGAACCCCCGAGTCGAGTCATGCAACCTCCACACGCACTGGGAGTCCCCGGCAGCGCGTGCTCCGATTCCCCGGGAGCCGGCCTGGCGGCGGTGCGCGGGCCGCCTCCGCCGACTCCGGCTTCCCCCTGATACCTCGCGCGTCGCAGGGCCCCGGGGCCCAGGGCGTCCCCACAGCGCCTCGGCCTCGGCGCGCGCCAAGCCGAAAGGCCCCCGGTGGCCCCCCGCGCCGCGCTCACTGCTTCTCGGCGTCCTGGATGCCGCCCGTGCCAATGGCGAACATTGCCTCGCCCTCGGGCAGGTTGGGCGAGTCGTAGATCTTGCAGACGCGGGTCTCGCCCTTGCCCTTGCGGAAGAAGAGCCGCGTCTGGCTGGCGTGGCTGATGA…
Lp_CL13972.Contig5_All	MN125775	CATGGATCTGCTGCAAGGCTTCCCGGTCCGGCACGCCCTACCGCCGGCCAGCGGTCGTGCAACCTCCACGTGCACCGGGAGTCCCCGGCAGCGCGCTCCCCGGCACACCCCAGGCCGGCCCAAGAACGCGAGCGGGCTGCCGGCGACTCCCGCCACCCCAAGAGCCCTCGCGCGCCGCCGGGGCGCGGCGCCCCGCGCGCCCCCGCGGCGCCGAGGGCTCGCGGCGGGCCGCGGCTCCAGGAGCCGCAGCCCTGCCGCCCCCCCGCCCGCACCGCGCTCACTGCTTCTCGGCATCCTGGATGCCGCCCCCGCCGATGGCGAACATGGCCTCGCCCTCGGGCAGGTTGGGCGAGTCGTAGATCTTGCAGACGCGGGTCTCGCCCTTGCCCTTGCGGAAGA…
Lp_CL13983.Contig1_All	MN125776	GGCCCAGGCAGCCACTGCCATGACCGCAGTGCATGCCATCGATGGGGGCATCGACGCTGGCATGGGGAGCTGCCGTGGCCTTCCACGCGGGAATTAGTCTCTCCTGCATCGGCCGCCTGCTCCGCCTCGCCCCCCTGCGGCTGCCGCGGGGCGCCGCCGTGCCGGCGGGGGCCCTGGCGCTCCTCGGCCGCCCGCGCCGCGCCTGCCAGCGGCGCCTGCTCGCGGCGCTGGCCCTGGCCTCGGCCCTGGCCTCGGCCCTGGCGGTGGCCCTGGTGGCCCTGCCGAGCGCCATGCTCGGCCACAGCCTCCGGGCGTGCGCCCAGGCTGGCCGCTGCCGGCCGCAGGCGCGTTGCGTGGCCGGCCGCGGGCCGCTGCTGCAGTCCGGCAGCCTCCGGTCGC…
Lp_CL13983.Contig2_All	MN125777	GCCCGGCTGCCTTTCGCCCCTGGCGCCCCTTGGCTCACCTGCTTGGGCCGCACCTGCTTCTCGAAGAGGCCCTGAACCTCTTTGGCAGTGGTAGCGGCCCAGACGTCCTTGTCCGGCCGGCTCCGCATGATCCGCGGGAAGCGCAGGGCGATGCCGCCTCCGCCCCCGCTGCTGCCGCACGTGTGCGCCGGCGAGAGCGAGAGGTCGGCCCCCCGGAGCTCCCAGACGGGCCCGCCCTCGACCCAGGAGTCCACCTTCCCCGCGGTCGAGGGGTCCACCTCCACGTCCAGCCCCGCCGCCTCCTGGCTCGGCCGCATGCTGGCGCTGTACTCCTCCTGGAAGTCCCTGAGGAAGGCGTCGGAGACGCCCGTGCCCACCCAGCAGATGGTCTGCAGCCGC…
Lp_CL14187.Contig1_All	MN125778	GGGCAGGCGAGGGATGAGCCCAGCAGGGCGCTCGCAAGCGCGGACCGGGGAGGGCGTTGCCCGTCCGGGCTCCGCCGATGCAGGGCCAAGGGAGCAGCCCCGCGGGCGCCGGCCTCTTGGGCCGGCACGAGCCGAGCTGCGACCAGGCCACGAACGGCGAGCCTGGCGGCGCCACTGCTCGCACCGCCAGGTCGGAGCTGGACGCTTTGGGCGACCTCCTTGGCGCACGGTGTGTGGACGCAGGCGAGCTCGAAAATGCTGTAATCCAGGGCTGCGACTTAGCTGCTGACCTGGAGCAGCAACGCCTGCAATTGGCACGGGCTGAGCAGGAGGTGCGCCGCTTAGAGGGTCGCCAGAAACTCTTGCAGCCAAAGGCCGCCGCGGCCCCAGGAGGCAGCG…
Lp_CL14187.Contig2_All	MN125779	GGGCAGGCGAGGGATGAGCCCAGCAGGGCGCTCGCAAGCGCGGACCGGGGAGGGCGTTGCCCGTCCGGGCTCCGCCGATGCAGGGCCAAGGGAGCAGCCCCGCGGGCGCCGGCCTCTTGGGCCGGCACGAGCCGAGCTGCGACCAGGCCACGAACGGCGAGCCTGGCGGCGCCACTGCTCGCACCGCCAGGTCGGAGCTGGACGCTTTGGGCGACCTCCTTGGCGCACGGTGTGTGGACGCAGGCGAGCTCGAAAATGCTGTAATCCAGGGCTGCGACTTAGCTGCTGACCTGGAGCAGCAACGCCTGCAATTGGCACGGGCTGAGCAGGAGGTGCGCCGCTTAGAGGGTCGCCAGAAACTCTTGCAGCCAAAGGCCGCCGCGGCCCCAGGAGGCAGCG…
Lp_CL14399.Contig1_All	MN125780	GGGATCGCAGGTGCCGGGAAGCATGGCGGCCGCAGCGCGGCGCACCGGCGCGGCACGCGCCCACGCGCTCTGGTTCCGCTGCGACCTGCGGCTGGACGACCATCCGGCGCTCCACGCCGCCTGCGAGGGCGCCGAGGCCCTGGTGCCCGTCTACGTCTTCGACCCGGCGAAGCACAACGTGCCGACGCTCGCGGGCGCGCGCAAGAGCGGCGCGCGGAGGTCGCGCTTCCTGCTCGAGAGCGTCGCGTGCCTGCGGAGGCAGCTCGAGAGCAAGGGCTCCGGCCTCGCGGTGGCGCTGGGCCGGCCCGAGGAGGTGCTGCCGGGCCTCTGCGGCGGCTGCCAGCGGACCTTCGCCACGCAGGGCGTCTGCACCGAGGAGAGGGCCGAGGAGGCCCGGGT…
Lp_CL14399.Contig2_All	MN125781	GGGATCGCAGGTGCCGGGAAGCATGGCGGCCGCAGCGCGGCGCACCGGCGCGGCACGCGCCCACGCGCTCTGGTTCCGCTGCGACCTGCGGCTGGACGACCATCCGGCGCTCCACGCCGCCTGCGAGGGCGCCGAGGCCCTGGTGCCCGTCTACGTCTTCGACCCGGCGAAGCACAACGTGCCGACGCTCGCGGGCGCGCGCAAGAGCGGCGCGCGGAGGTCGCGCTTCCTGCTCGAGAGCGTCGCGTGCCTGCGGAGGCAGCTCGAGAGCAAGGGCTCCGGCCTCGCGGTGGCGCTGGGCCGGCCCGAGGAGGTGCTGCCGGGCCTCTGCGGCGGCTGCCAGCGGACCTTCGCCACGCAGGGCGTCTGCACCGAGGAGAGGGCCGAGGAGGCCCGGGT…
Lp_CL14409.Contig1_All	MN125782	AGCAGCAGTAGCAGCAGCAGCAGCGGCAGCAAGAGCAGCACGTCTGGCAAGTCCCGCAGCGTGAGCAGCAGGAAGGCAAGCGGTGCATCGGAGACCACGGGCATTGCAGCGTCAGTTGCCTCAGAAGGTCCAGTGAGCGGCGGTCAGCAGCAGGGAGGCCCGCAGCCGCTGAGCCCGGCGGGGAGCGAGCAGCTCGAGGCCACCGCGGCGGCCGGGACGCCCAAGTCTCCTGACGTTGTGATGGCAGCAGTCCCGGACGTGGAGGGCAACGGCCGGGCGGAGGCAGTCGCAGGTGCCGGCGCCCCAGCCACAAGGCTCCCCACAGCGTCCTGGGACAGCATGGCCGCCGGAGGCACGGGGTCGCCCGAGGTGGAAACCACGAAGCCGGCCGCGCCGGGC…
Lp_CL14409.Contig2_All	MN125783	AGGCCCAGGCCCAGGCCCAGGCGCGTGTGAGCCCGTGGACGGAGGCCCAGCCCTGGGCGCGGCCGCCGGCCCCGGCGGGGAGCCCGCCCGCGGCCACCGGCCGGCCCGGCGGCCCGGCCGCCGCGGCTGCTCCTCCGGCGCCGCTGCAGCCTGGCGGAGCGGCCGCCGGTCTCCCCTGGCAGCCTGCCGGCGCTTCCCAGCAGGGCGCCAGCTGCAGGGCCGGCCCGCCGCAGCAGCCGCAGCCTGCGGGCTACATGCCCATCAGCGAGCTCTCGCCGTACAAGGGCAGCAAGTTCTGCCTGAAGGCGCGGGTCGTCACGAAGTCGGACATCCGGAGGTTTTCGAACGCGCGTGGCGACGGCCAGCTCTTCAAGGTTGACCTAGCTGATGTGTCCGGGG…
Lp_CL14409.Contig3_All	MN125784	CTGAAACTCACTTTGCACCGTGTGCAGCCCGCCACCCCTCTCCACGCACCGCTGTGTGGCGCCTGGCGCCACGCATCCGGCAAGCTAGGGGGCACGTGACGCGCGAGGAGAGCGGTGGAGGTCCGGCGGGCGGCCGCTCTACATGCAGCCGCGCAGCTCCCGGCGCTCAGGACCCGCGCGGCGCCTCAGCTCGCGTGCGCCGGCGCCCCGGCAGCCGCTCCAGGCACGGCCGCGGCGGCCGCGCCCGGGGCCGCCGAGGCGAGGACCTCTGCCAGCATGCGCCTCGCCTCCTTGGCCAAGTCCAGGGCGCTACCTTCGTTGACGCCGTACCTCACGCGCTCCTCCTCCTGCCAGACCTCCTTCTTCGCAGTGAGCCTGAGGCAGACTCGCCTCCAGAGC…
Lp_CL15065.Contig1_All	MN125785	CTCCCAGCACGCCCGGGCACTTTGCCAGGCAGGCCTTACGCGACCATCAAGGCCACTGCCACAAACTATAGCGCCTGTGCACAAGCACTGTGCACGCGCTCCGGCCTGCACTCCAAGCTGCTCTCAGCTACAAGTGCAGGCCTCCACCCACGCCAGCACAGCAACAGCACCCATGAGGCAAGTGCACTGTACGCACAGAGGCCGCTGCACGCCGACAGAGGCACTGAGCAAAACAAATGCACAAGCAAGCACCGAAGCCGCGCACCCGCTCCTAAACGCTCCAGCCAAGCTGCACCCAGCTGGCCTCGCCTACACCGCAAGCTCAGCCGCAGAAGCCCCTACGAGCCGGCCTGGTACTCCGGGATCCCCATGTGCTCACACGCGCCATGCATGAGCTTC…
Lp_CL15065.Contig2_All	MN125786	GCGGGGCGGTCCTCCTTCAGGCGCGCCGGTCCGTTCCAGCACGCCCCGGCACTTTGCCAGTCAGGCCTTACGCGACCCATCGGATCGCTGCCGCAGAGCAAACGCTGTGCACACCCTGTGCACGCGCTCTGGCCTGCGCCCTAGGCTGCACTCAGCCACAATCGCAGGCCGCCAAAAACCAACTCACATGCACACGCCCGCCAGCCAGCACAAGCACGCCCACGCGCTCAGGCCGGCGGCACTGCACACATGCGCCGCAAGCCCACCTACGCACACACTGCAAACTCAGCCGCAGAATCCCCTACGAGCCGGCCTGGTGCCCTCACCTCCTCCCAAGCAGCACGCACACACCCCGGCTTGCGGCCGCCATGTCCGCCAGCCGTTCGCGGTGCACGCTGC…
Lp_CL15065.Contig4_All	MN125787	GGGGGCGCGGGGCACGTTCTCTTGAAGGCGGGCCGGTTCGTCCCAGCACGCCCGGGCTCTTTGCCAGGCAGGCCTTACGTGGCCCTCAACGGACCACAGCCACAAACCAAGCGCTCGTGCACAGCACTGTACACGCGCTCGGGCCTGCGCTACAGGCCGCACACAGCCACAAGCACAGGCCTCCACCTACGCCGGCACAGCAACAGCACCCGAGATGCACGCACACTGTACGCTCAGAGGCCGCTGCGCGCCGACAGAAGCATGAACCTACCATGTACAAGCAAGCGCTGAAACTGCGCAACCACTCCTAAACACTCAGGGCAGGCGGCACTGCACCCATGCGACACAGCCACCTACGCCTACACCGCAAGCCAGCCGCAGAAGCCCCTACGAGCCGGC…
Lp_CL16467.Contig1_All	MN125788	CGCCCAGAAAACACTCACAATGCCGGTGCCATTGTTCCGTGTCGAGTGCACGCGCCCCCTCAGACACGCCCCATGCGGCATCGCCGTCCCCATGCAATGCCGCGTCAACTGCACTCCACGGTGCGGCCCGAACCATGCACCCCCAGGCCGCGGCCCGGCCTCACTCGTCGATCTTCGGAGCCAGGTAGAACTGCATGTAGCCGTTGTCGTTCCTCTCGAGGTCGTACTTCACCAGCAGCGGCGCGTCGGGCCCCAGGCCGAGCTCCACGGCCCCGGAGAGCGGGGCGGCCTTGGCAAAGTTGACGAGGTAGCGCAGCGCGAAGGTCGCGGTCACGGGCTCGTGCACCGTGAGGCTCACCCGCTCCTCCGGCTTCTCCGACTCCCGGGGCTTCAGCATGA…
Lp_CL16467.Contig2_All	MN125789	GCCCAGGAAGCACAAGCCCAGGAAGCGCTCTCTGCGCTGGTGCCAATGTTCCGTGTCGAGTGCACGCGCGCCCTCAGACACGTCCCACGAGGCATTGGCATCCCCCTGCAATGCCGCAGCAACCGCACACCACGGTGCATGCTGGGAAACCGGCCCGAGCTACTCACCCCCACGCCGCTGCCCGGCATCACTCGTCGATCTTCGGAGCCAGGTAGAACTGCATGTAGCCGTTGTCGTTCCTCTCGAGGTCGTACTTCACCAGCAGCGGCGCGTCGGGCCCCAGGCCGAGCTCCACGGCCCCGGAGAGCGGGGCGGCCTTGGCAAAGTTGACGAGGTAGCGCAGCGCGAAGGTCGCGGTCACGGGCTCGTGCACCGTGAGGCTCACCCGCTCCTCCGGCT…
Lp_CL16467.Contig3_All	MN125790	TCGAGTGCTCGCGCGCCCCCAGGCGCGCCCAAGGGCCACTGCCACCCCCCTGCAGTGCCCCGTCAGCCGCACTCCACGGCGGGTGGAGAGGATGCCTCGTGCCACGTCCCTAGGCCAAGTCCGTCCTTCACTCGTCGATCTTCGGCGCCAGGTAGAACTGCATGTAGCCGTTGTCGTTCCTCTCGAGGTCGTACTTCACCAGCAGGGGAGCGTCGGGCCCCAGGCCGAGCTCCACGGCCCCGGAGAGCGGGGCGGCCTTGGCAAAGTTGACGAGGTAGCGCAGCGCGAAGGTCGCGGTCACGGGCTCGTGCACCGTGAGGCTCACCCGCTCCTCCGGCTTCTCGGACTCCCGGGGCTTCAGCATCACGTTGCCCGCGCCCACGTCGCCCTGCACGCTGA…
Lp_CL16467.Contig5_All	MN125791	AGAAAACACTCACAATGCCGGTGCCATTGTTCCGTGTCGAGTGCACGCGCCCCCTCAGACACGCCCCATGCGGCATCGCCGTCCCCATGCAATGCCGCGTCAACTGCACTCCACGGTGCGGCCCGAACCATGGCGTCAACTGCACTCCACGGTGCGGCCCGAACCATGCACCCCCAGGCCGCGGCCCGGCCTCACTCGTCGATCTTCGGAGCCAGGTAGAACTGCATGTAGCCGTTGTCGTTCCTCTCGAGGTCGTACTTCACCAGCAGCGGCGCGTCGGGCCCCAGGCCGAGCTCCACGGCCCCGGAGAGCGGGGCGGCCTTGGCAAAGTTGACGAGGTAGCGCAGCGCGAAGGTCGCGGTCACGGGCTCGTGCACCGTGAGGCTCACCCGCTCCTCC…
Lp_CL16467.Contig6_All	MN125792	GGACCTTCCAGGGCCCCCTCACTGCGCTGGTGCCAGTGCTCCGCTTCGAGTGCTCGCGCGCCCCCAGGCGCGCCCAAGGGCCACTGCCACCCCCCTGCAGTGCCCTGTCGGCCACTGCCACGGCCCACGCCACGCCCCAGGGCCAGGACCCTGCTTCAGTCGTCGATCTTCGGCGCCAGGTAGAACTGCATGTAGCCGTTGTCGTTCCTCTCGAGGTCGTACTTCACCAGCAGGGGCGCGTCGGGCCCCAGGCCAAGCTCGACCGCCCCGGAGAGGGGGGCAGCCTTGGCGAAGTTCACGAGGTAGCGCAGGGCGAAGGTCGCGGTCACGGGCTCGTGCACCGTGAGGCTCACCCGCTCCTCCGGCTTCTCGGACTCCCGGGGCTTCAGCATCACGTTG…
Lp_CL16467.Contig7_All	MN125793	CCCAGGAAGCACAAGCCCAGGAAGCGCTCTCTGCGCTGGTGCCAATGTTCCGTGTCGAGTGCACGCGCGCCCTCAGACACGCCCCACGAGGCATTGCTGTCCCCATGCAATGCCGCATCTACCGCACTCCACGGTGCATCCTGGGAAAACCAGACCGAGCCACTCACCCCCAGGCCGCGGCCCGGCCTCACTCGTCGATCTTCGGAGCCAGGTAGAACTGCATGTAGCCGTTGTCGTTCCTCTCGAGGTCGTACTTCACCAGCAGCGGCGCGTCGGGCCCCAGGCCGAGCTCCACGGCCCCGGAGAGCGGGGCGGCCTTGGCAAAGTTGACGAGGTAGCGCAGCGCGAAGGTCGCGGTCACGGGCTCGTGCACCGTGAGGCTCACCCGCTCCTCCGGCT…
Lp_CL16467.Contig9_All	MN125794	AGAAAACACTCACAATGCCGGTGCCATTGTTCCGTGTCGAGTGCACGCGCCCCCTCAGACACGCCCCATGCGGCATCGCCGTCCCCATGCAATGCCGCGTCAACTGCACTCCACGGTGCGGCCCGAACCATGCACCCCCAGGCCGCGGCCCGGCCTCACTCGTCGATCTTCGGAGCCAGGTAGAACTGCATGTAGCCGTTGTCGTTCCTCTCGAGGTCGTACTTCACCAGCAGCGGCGCGTCGGGCCCCAGGCCGAGCTCCACGGCCCCGGAGAGCGGGGCGGCCTTGGCAAAGTTGACGAGGTAGCGCAGCGCGAAGGTCGCGGTCACGGGCTCGTGCACCGTGAGGCTCACCCGCTCCTCCGGCTTCTCCGACTCCCGGGGCTTCAGCATGACGTTG…
Lp_Unigene124_All	MN125795	GCGAGCCGCGAGGGGCGGGGGTTGCGGCGAGGGCGGTCGGGGCTGGCCGCGGACAGCGCGGGGCCGTGGGCGATGGACCGCCTCGACCGCAATGTGGTGCACGAGATCTGCACAAACCAGGTGGTCGTCACGCTCCACGCATGCGTGAAGGAGCTGGTAGAGAACTCCCTGGATGCGGGTGCAACACGCATCGAGGTGCGGCTCCGCGAGAGCGGCAGCGAGCTCCTGGAGGTCGTGGACAATGGGCGTGGGGTGCAGTCTGAGGACTACGCAAAGCTGGCCACCAGGCACGCGACGTCCAAGATCCGGGACTACGACGACATCAGCAACTCGCTCGCCACCTTCGGCTTCCGCGGCGAGGCGCTTTCGGCCATCTGCGCGATGGGCGACATGACCGTC…
Lp_Unigene981_All	MN125796	GCAGCAGCAGCAGCAGCAGAAACAGCAGCGGATGCGGCAACCGCAACAGCTGCAGCAGCAGCACCTGGGACAGCAGCAGCAACAGCAGCAGCCTCCTCGGGGCCGTGGAGTTGTACGGATGTGGTTGAGGCTGCGCTTGCAGACTTGGGGATGGACGTCGGCGTCACGTGGGCCCCGGGTGCCACCTCTGCAGCGCCCTTGCATGCTGCGTCGTCGCTTGGTGCCTCATCTACAGCAATGGGGACTCTGGCTCCATGGGGCTGCCCTCCGGGGTCCTTGACCACCGTCACCAGGGCAGCAGCGAGCAACGGTGCCGAGCCCCCCGGAGCAGCCCTATCTGCAGCGATGTGGGCGATGCCGTTGCCAGGCGCACGGACCCAGCGAACGGATCACGCAGTG…
Lp_Unigene1654_All	MN125797	GCGGGCACGGCCCCGCGCGGCGGCTCTGCCGCCGCCGCCAGCGGCCCCGCCACCTGCTGCACCGCCTCCCGGCGGTGCCGCGGGCGCGCCGTCCAGGCCGTGGCACCGCAAGTCCAGGGAGGCGCCGCACCGGCAGGTGGAGAAGGCCGCTTGCACGATCGGTGCCGCCCGGCCGCGATCCTCGCGCCCCGAGAAGTGCTCGCCCAGGGCCGCGTCCAGCGCCGGGGCGTTGCGCTCGAGGGCCGCGTAGCAGCGGTGCGTGGCCGTCAGGGCCTCCGCGAGGAACTGCTCCCGGGCCTTGGCGCCCCGCGCGATCTCGCCCATGCCGCGCTCCATGGCCGCCCGGAGCTCCGGCTTCGAGAGGTCCAGGCCCTCGGCCGCGAAGCGCTGGTAGCCCTC…
Lp_Unigene2100_All	MN125798	CGGGCCCGCCGCGGCCCGCCGCGGATGCCGGTGCACGGCCTCTGGGAGCTGCTGCGGGGCCGCGGCCTCGTGCGCGAGGTGGAGGGCGCGGAGGAGATGCGGGAGCTGCTGGAGCGCAGGAGGGTGGCCGTGGACCTGAGCCTGTGGGTCGTGGAGGGGGGCGCACGGGCCACAGCACTCGGTGCGAGTGGCGGGCGGGTCTGGCCGAACTTCTACCTGCTCGTGAGCTTCTGGCGGGCCGTGAACCTGCTGCAAGCGGGCTCCCTGCCGCTAGGCGTGGCCGACGCGCCCACGGCGCCGGCGCTGAAGCGCCGGCAGCGCAGCAGCGGGGGGCAGCTGGACATGCACCTGCGGCAGGCGGTGCGGCTCTTCGGCGCCCTGGGCTGCCCCACGCTGGGC…
Lp_Unigene2242_All	MN125799	GCACCGCGGGCAGCCGCCTAGGATGCGAGCGGCGCCCAGCCCTAACAACGTGCGGCCGCCCGCCCCGCACCGCGGGCGGCCGCGTCAGCTGCCCCCTTCGGCGGCCGCGTCGGCCTCCCGGAGCTCCAGGAGTACGGGGCAGTGGTCGGAGCCCAGGAAGCCCTCGCGCCCGGCGCCGCGGCCCAGGATCTCGCAGCGCGCCAGCCGCGGCGCCAGGGCCTCAGACAGGAGGAAGTAGTCCAAGCGCTGCCCCATGCCCTCGTAGCGCGCACGGAAGCGGCTCTGCACCGCTGGCGTGCCCCGCCACGTGAAGGCGGCATCGCCCGGCTCCGGCGGGGTCTCCCCCACGCGGTGCAGCCGCCGCCAGGCGTCGAAGAGGCCGCCCGCGGTGAACAGCCG…
Lp_Unigene4570_All	MN125800	GCTGCTGCCGTTGCTCTTGCCTGCTGGACAAGCTGCAGCCCCCCGGGCGAGAGGAGGCAGCAGCGCTGCCACGCGCTGGCTGCGGCGTCACTCGATGACGATGCAGGCCTCGGCCCGCAGGCGCTTGGCCTCGGTAGGCCCCGCCTCCTCAGCAGGCCTGCAGCTCACGGCCGCCGTGGCCCGCGGCGCAGGGGGCGTGAGGTCTACGCTTGCCGCGCCCGCTGCGGGCGGTGTGCGGGCCACGCATCCCAGTCTGCTGCTGAGGGCTGAAGCCGCCGAGGGCCTCTTGCCCGCAGCATCCGGGCTCCGCACCTCCAGCGGCCCTCCACTGCGGCCGAGGCCCGGCCCTGGCCCGCGCCGGCCCTTGGCCGCCGCCGCGCCTGCGGGCGGGCCGCCGGC…
Lp_Unigene4975_All	MN125801	GGGGAACACAGCGCCACATGCATCCGCCGCATGCGCCACATGCACGGCCTCTGGCTCAAGCCAGGTCCACCGCAGCGGCCGGCGCGCCACGGAGGGGCACCCGGAAGCGCGCGGCCGCCGCCGCGGGCCGCTTCATCGCCTCGGCCTGCTCCGGGCTGCCGGCGGCGGCCGGCCGCTTCCGCGCCGCCCGGCCGGCCGGCCGCGGCTTCGAGGCGGCCTCGCCCGCGCCGGCGGGCCGCTCGCCCGGCCGCTGCAGCGCGGGCACGTAGGCCGTGGTGCGGCCGCCCACGTCCTCGAAGGCCACCTCGCTGCCGTCCGGCAGGCACACGCCTGCGCCGCTGGGCCCTTGGCCCCAGCGGCAGTGGAAGAGCCAGTTCTTGGGGAAGCGCGCCGCGTCCG…
Lp_Unigene5203_All	MN125802	GTTGCACAGAAAGCCTCGCCTTCGCCTCCTCTGGCCGTGTGGACCTAGAGGCACTCGATGGAGGGCCCCGCCGGCATGCTCGCCTTTGCCCTCCCTGCCGGCTCGAAGAGCACTTGCCGGCCCCAGAGCCGCCGGTGGCCCGCCACGTGGGCGGCCCGTCCACTGGCTCACTGGATGACGCGCCCGACCTCCTTCAGGGTGATCTCCGTGACATTGCCGTTGCGCTTGTTGCTCTTCACCTGAAGCTGCGTGCCCGGGCAGAGCAGGCTCTCCTTCTCGTTGCTGTAGAAGGTGATCGCGGAGATGTCGCTGGCGGTCTCCGACTCCACGGTGATCACCGTGCACTTGCCGCCGCAGCCCTTGGCAAAGTTCTTGGCCACGTTGATGTCCGCCGTGCAG…
Lp_Unigene5237_All	MN125803	CCCGGCCTCACGCGTCGGCCCGCCCCCCCCTGGCCGCTCCGGCCGCGAGTGCCGGTGGCCCTGCTCCTGCTCGCCGGCGCGGCCGCAGCGGCAGTGCTGGGCACTGCTGCCCCAAGCGGCCCCTCCGGCGGCTGCGGCCGCCTGGGCCTACGCCATGAGCATCTCGTTGATCTCCTGCAGCATCTCGCGACCGTGCTCTCCACGGTCCACGGGGCAGGCATCGAAGCAGCCCACGCTCAGCTTCTTCTCACCGTTGGCGTGGTCCACCCTGACGCGCACCATGACCTGGAGGGGGTCGTCGAAGTAGCGCTTGTGGACGGCGGCCTCCAGCGCGTCCCTGCCGCCCTCGCCGGTCTCCAGCGCGCTGGCCTCCTCCGCGTCCATGCCCAGGATCTCCGT…
Lp_Unigene6245_All	MN125804	AAGGACAACATTAAATAAAGTGGCAGGAAAAAGACCCTGCGCCACCTCCCATGCCCCCTGCCTTGGTCCGACCACGGGTGTCAGACGCACTGGAAGTGGACGTCGTCAACAGTCGTGAAGATGTCGCCGTCCTCCACGAGCTGCAGCAGCGCCCCGCGCACCTCCTCCGCCGGCACCGGCCTCGCGTACTCGCAGACCGCGGCGAGCGCAGCGCCCTCGGCCCGCGCGGCGCCCTCCTTCTGCACGAAGGCCAGCACGGCGGCGCGCAGGGCCTGGCCCTCCATCCTCGCGTGCTTCGGCGGCGAGAGCTCCGGCACGATCGTGGCCTGCGCCGCGGGTGCCGGCCGCTTCGGCGCCGGCGTGGCGGGCTCCGCGGCGCCGATGCCTTTCCGCAGCTTC…
Lp_Unigene6860_All	MN125805	GGGGCGCCGCGGGCCGAGGCGGCGGCAGCCGCTGGCCGGCGGCATGCCATGGAGCCCCCCGGCCCGGCGCCCCAGCCGGTGGTCTGCGCCTGGCTGCGCAACGACCTCCGCGTGCACGACTCGCCGGTGCTGCACCGGGCGGCGGAGGCCTCCGAGCAGCTCGGCCTGCCCGTGCTGCCGGTCTACGTGCTGGACCCGCGGTGCTTCCGCCCGGCCGCGCACGGGGCGCCGCGCACGGGGCCCGCACGCGCGCGCTTCCTGCTGGAGGCGCTGCTGGCGCTCAAGCGGCGCCTCCGGCGCCTCGGCTCCGACCTCCTCGTGCGCCCAGGCCTGCCGGAGGACGTGCTGCCG
Lp_Unigene7276_All	MN125806	TGAACGTGATGGCCATCTTGCTTGCGCTCACCTGCATCGTGTCGCCGAAGTCCCGCAGGTCCCGGCAGATGCGCTGGAACTCCGCCGCGGGCAGCCGCGCGGTGGCCGCGAAGTGCTGCTCCGGGATGTCCATGTGCTCGCTGTCGATCTGCATCAGCTTCAGGTCGAAGTCCGTGACGCGGTCGGAGTGGCCGCTGTCGATCTGGAGGTTCGCCACGTCCTCCTCGGACCTCCGGATCTTCAGGGAGTCGCCCGCGCTGCACATCTTCAGGATCTTCGCGAGCGCCTCCACGTTCACCCCCAGGCTCATGGGCGTGTCGCACGTGAACTCGGAGAAGGCGGCCTCGCGCAGCAGCAGGGAGACCAGCGCCACGTGGGACACGTCCATGGCCTGCACCT…
Lp_Unigene7953_All	MN125807	CTGGCGGTCATCCCTATCAACGTCACCAGACGTCGGCGCGAGCGCAGCAGCGCGCGCGCCCGCCGGGCGGTCAGCCTCCGCGGGCCGCGTCGGCCGGCAGCCGGGACCACCTGTTGTCCCCCCACCGGCGCTTCCTGTCGCCCTTGGCGGCTCCGGGGCCCTCGCCTTGGCCGGAGTAGTAGCACTGCCTGCCGCCCCCCTCGGTGGTCTCGTCCCGCGGCGCCGCCCCGCCGCCCGAGCCGCGGTTGCCCATGCCCTTTGACGGCTCGGCGCGGTCCTGCTCGCCGCCCCGCCAGGAGGCGCCCGTGGGCGTCTCCGCCGGCCGGGAGCGCCTGGCCTCCTCCCAGCGGCCCTTGTTGAAGCTCCCGCCGGCATGCGCCGGGTAGCCGCCCTCGCTGC…
Lp_Unigene8556_All	MN125808	CCGCCCGGCGTTCGAGGGCTCACGTCGTGCGACACAGAGGGCTTCTATAACCTGTGTCGCTTCCTGGAGTCCCTGCACCTGAAGAAGAAGCAGGACAAGTTGGCTGCCCTGGAGCACTACCTCCGGCGCTTTGATGCGACGTGCGACCTCTACCCGCTTATGCGCCTGATATTGCCTGGCGTGGACCACGAGCGGGGAGCCTACGGCCTGAAAGAATCCAACTTGGCGAAGCTCTTTGGCGAGATGCTGGCCTTGCCTGAGGTGCAGAGGCAGCGGCTGTTGCGCTGGAAGGACCCAGCCCTGCAGGAGGGCTACAAGTGTGCAGCTGGGGACTTTGCTTCCGTCCTCTACTCGGTTGTCGAGGCGAGGGCCACAGTGAAGCCGGGTACCTCGGCCCTG…
Lp_Unigene8874_All	MN125809	CGGGGGTTGAGCCTCAGGGCCGGCCAAACGATGGTATCGGAATCTGGTGTTGGAACCCATCAGAGGCCTTCGGTAGCCGTCGTCTGGTTCAAGACCACCGACCTGCGGACCCACGACCACGAACCCCTCTCCGCCGCCCACGCCTCTGGCCATCCTGTTCTCCACCTCTTCGTCCTGGACCCGCGGTGGTTCCGCAAGACGCCCCTCGGCGGTTTCCCGCGCACGGGGCCCATCCGCGCTCGTTTTCAGCTGCAGGCCTTGGAGGACCTCGCGCAGCGCCTGAGATCCGAAGGCCACGAGCTCTGCATCCGGCGTGGCAAGAGCACCGCCGCCGTCTTCGCGGAGCTCTGCGAGGACTTCGAGGTCGCCGGCGTCTACGCGAGCAACGAGGTCTGCCCC…
Lp_Unigene8962_All	MN125810	CGGGCGGCCGGCGGCGCGCCGGCCTCCCCCCACCATGGCGGGGGCGGTGGTGGGCTTCATCGATATGGACTGCTTCTACGTGGCGGTGGAGAGGCGCCGCGACCCGCGGCTGGAGGGCCTGCCCTGCGCCGTGGTGCAGTACAACTCGCGGCAGCGGGGCGGCGCGCCCGACAGGCCGCCGGAGGCCTGCCGCTGGGTGCAGGGCAGCAGCGGCGGCATCATCGCCGTGTCCTACGAGGCGAGGAGGCGGGGCGTCACGAGGCAGATGAGCAGCCAGGAGGCGCGGCGGCAGTGCCCCGAGATCGTGCTGGTGCAGGTGCCCACGGCCTTCGGCAAGGCCGACCTCCGGATCTACAAGGAGGCGGGGGACAGCGTGGCGAGCCTCCTGGCCCGCCGCGC…
Lp_Unigene9260_All	MN125811	CGCGCGGCTCCACTCCGCAGCGCTCCTCTGGCGTGGGCGCGAGCGCCTCGCCCTCGGGGGACGAGAATCCGCGGCCGCGGGCATGCCGAGGGCGCCTCGGTGCACGCCGCGGAGCCGCGGCGGTTGCCACGGGCAGGGCCGGGGCTCCGCCCAAGCCGAGGGCACGGGCCGCAGCGGCGGGTGGTCCTCTGGTGCTGGAGCCAGAGGTGGAAGCCCGGCGCTCCAGCGGGCCGCGGGCCGCAGCTCGCCGGCGCGTAGCAGCCAGCCCTCCGTTGCCAAGGGCGAGGAGGCCAGGGCGCTGGGCGCGTCAGGGCCGGGCGCTCTCTGCGCCGTGATTGAGAGCCGCGCGCGCGAGGTGGGCCTTGCCGCCTTGCACAGGCAGTCGATGGAATTCGAGCT…
Lp_Unigene9316_All	MN125812	AGAATGGGGCGCATGCCAAGACCAGAGCTCACTGGAACAATGCTCTTGGCGCCGCTCAGATCCATGCACGCCTGAGGATCTTCTCAGGCACGACGTGCAATGCGATTTCCTCTGCACTGTAGGCAGCGTGCATTGCCTCGAGCTCAAACTTCCGACTCATTGAGCGGACCTCCGAGGCGTAGCTGTCGTTGCCGCGGACCTCTGGGCGCCGCAGCAACGATGCCTGCAGTGCGCGGTCCCGCGCCGTTAGGGGCAGCGATGCCTGGGCAGGGAGGCACCGCACGTCCGCCTCATGCATGCCCAACCACTGCAGGCTTGGGCAGCTGGCGCGGTAGAGGAGGAAGATGCTCACGCCGTGCGGGTCGTAGTCGCCCAGGTACACCTGTGGCAGGTGCGGCG…
Lp_Unigene10768_All	MN125813	GGAGCGCAGGACCCTCAGGCGCGGGCGCCGGCTCGCGCCCCGTCCTGGGGGGGATGGGCGTGGGCGGCCTCTGGGACCTGGCGTCGCCCGCTGGCCAGCGCGTGAGCCTCAGCGCTCTGGAGAACAAGGTCGTCGCCGTGGACGCCAGCATTTGGCTCTACCACTTCGTGAAGGCCATGCGCGACGAGCACGGCAACATGGTCAAGGGCGCGCACGTCATCGGCTTCTTCCGGCGCATCTGCAAGCTCCTCTACCTGAAGATCCGGCCGGTCTTCGTCTTCGACGGGCCGCCCCCGGAGCTCAAGCGCCGGACGTTGCGCCTGCGCGCGCAGAACCGGGATGCAGAGGAGCGCCAGCGCCGCAAGGCAGTGGAAAAGCTGCTGCGAAACCAGCTGCAGA…
Lp_Unigene13451_All	MN125814	GGCGCAGGGCCCGCGCCCGGCCCCCGCGGCCGCGGCCGCCCGGGCGCCATGGTCGAGGGCCCCAGCTGCAAGCGGAAGGCGGAGCGCCTGCAGGCGCTCTGCGGCCAGCGGCTCCTGGCGGCCCGGGGCCTGGCGGCTTTGCAGCGCTGCCTGGGCGAGGCCGTGCTGCGGGTCTTCGCCATAGGCAAGGAGCTGTTCGTGGTCTTCGCGCCCTGCGTGCTGAGGCTGCACTTCGGCATGTCCGGCGGCGCGGAGCTCTGCCGCGCCGGCGCTGCGCACAGGCCTACGCGCAAGCCCGTGACGCTCGTCTGCGAGCTCTCCTGCGGCAGCCTCCGGGTCCAAGGGGCCACGGCCAAGGCCGTCGAGCACGGCTACGTGGCCGCGGCCGAGGCGCGGCGG…
Lp_Unigene13746_All	MN125815	CAAGAATCCGTGCGCGGTGATGGGCCCGGGCAATCGAGTGTTGCCGCCCGGAGGCCCGTGGGGCCAGGCGGCGCACCTCGGGGCCGGGCGCTGAGCCCGGCCCCGCGCCGCGGGCGCAGCCCGCGCATGGCGGGTAGCCGGGGCTTTGAGCTGCTGAGGGAAGCGTGGGGCATCGAGCTCTCGGAACGCGCCAAGGAGGAGATAGAAGCGAACGCCGAATCCCTGAGCCAGGCACATGTCGAGGAGTACCTGAAGGACACCGACATCAGGAAGTTCGGGGTGGTTTCCTTCCTGCCCAAGGACATCGCCAGGAGCACCGCAAGCACCATCCCAGCGGGAAAGTACATGGTGCAGGTGACAAAGATAGCGGACGTGACGCAGCCAGCCAAGTTCCAAGAG…
Lp_Unigene13916_All	MN125816	AGGGCCACCCGTCCGCGCGCGCCCTGCCTGGTACGCCCGGCCGAGCCCCGGCCCCCCTGCCGCCGCGGGCGCGAGGCACGCGGCATGCTCGGCGCTCCGCCGTCCCTGCTGGCCTCCCAGGGCCCGGGCCTCGCCACGGGCCTGGCCGCCCAGGAGGGCGCCGCGAAGAAGGCGAGGCACGAGGACAAGCAGACGTGCCTGCCCGTGACCGTGCGCGCCGTGGAGGAGGCGCTGGGGCTGCGCGGGGACGAGGCCGGCGAGGGCCTGCGCTTCCACGGCACGGACCAGGGCATGCTGATCCTCGTCGGCGTCGTGGAGGGCCTGGTGAGGCAGCCGGCGAGCGTCGAGTTCACGCTGAACGACACGACCGGCCGCATCAAGGCCAGGCACTACCTGGTG…
Lp_Unigene15679_All	MN125817	GCGACGGAGGCCTCCAGGTGTCGGCAGCCATGCCGGGCTCGAAGCAGGACCCCACATGGCGTCGGCGGCGGGCCAGGGGGGCCTCGCCGCGCCGGCGCGGTCCAAGCGGCAGTTGCGGATCGCCGTCTCAGCAGAGGGCATTGAGGGTCCTGAGCATGAGAAGGACGGCGCCTCCGCCCCGCGGCCGACGCGGCCTGGCGCCGGCCAGCCGAAGGAGGAGCCGAGGGCCAAGCGGGAGCGCCCGCAGAGAGTCGGGCCCGCGGCGGAGGCAGAGGAGGCTTGCGCTTGGGAGGCGCCTTGGATGCCGGCCGCGCTGGGCCAGGGCCAGCAGCCACTGCCTGAGGACGAGGCCGAGGCCCAGGTGGAGTGGCTACTGCCTATGACCCACGGGGGCGGCTG…
Lp_Unigene16086_All	MN125818	GCCATCCCCATCCTTGCGAGTGCACCTGCCGCGGGAGCCGGCCGCGATGGCCGCGAGCCTTGGCGTCGGCGCTTGCGCCGAGCTACGCGGAGCTCAGCCATGGCTGCCCAGGCTCCACGCGACACCTCCCACTTGTTTGTCTTCACGGGCGTCACGGCGAACAAGGCGGGCATGGGGGCCGACAAGGAGCTGGTCTCAAGGTTTGTCTACGAGCGCTGCAAGAGCTCAAAGTACACGCAGCGGCAGGAGGACCTCGACGCCAAGCAGCAGGCCCGGGCGGAGGCCATGGCCGCAGAGCTCCGCGCCCTGGACGCCCGCATGACGCCCGCGGAGCACCTCGTGGAGGAGCAGAAAGCCACCGCGGAGTTGCGAGCCTTGGAGGCCAAGCGCGACCTCTCC…
Lp_Unigene16311_All	MN125819	GCTCGAGCCCCAGGCGCGGAGCCGCCATGGCCGCGGTGGTCTGTGCGTGGCTCCGCAACGACCTGCGCGCGCACGACTCGCCCGTGCTGCAGGGCGCGGCCGCGCTCGCGCGGCAGCGGGGCCTGCCAGCGCTGCCGGTCTACGTGCTGGACCCCCGGCACTTCCAGCGCACGAGCCACGGCACGCTGAAGACGGGCCCCTTCCGCGCGCTCTTCCTGCTGCAGGCCCTCCGGGCGCTGAAGCGGCGCCTCCGCGGCCTCGGCTCGGACCTCCTGGTGAGGATAGGCAGGCCCGAGGTGGTGCTGCCGCCCCTCCTGCCGTCGGGTTCCGTGCTCCTGACGCAGCAGGAGGTGACCTCGGAGGAACTCGGGGTGGACGGCCGCCTGCGCAGCGCGCTCG…
Lp_Unigene17168_All	MN125820	GCCGCCGCCGAGGCGCAGCCACTCGTGGCCCGTCCGCGAGATGGTCTCAGGGTGGTCCCGCCGCACCTGCAGTACCCGTGCTGCGTGGGCCCGTCGGGCGGCGTCGAGGTCCTCCACCAGGCGCGCCACGTAGGCGCTGCGCAGGAGGCCGGCCGCGGCTCGCACGCCCCTGGCCGGCACCTCCCACGGGCAGTGCACATACTCCACCGGCAGGTGCGCGAGGCAGGGCAGCCACCTTTTGACATAGTGACCCTCGGGATCGCAGCTCTTGGCAGCGTGCACGGGGTGCATCACGAAGTTCCAGTGGTCGGGGCCGGAGTGGCCGCAATTCTGCCACATGTAGGCATTGATTGCACAATCGCTGTCCACGAGCGTCCAGTCAAACCATCGGAAGCCCTC…
Lp_Unigene17251_All	MN125821	GGTCCCACGAGTGTGGGCGACGGCGTTCGGCCCCGCCGCGAGCACCACCAGCCATAGTCCTGCATTGGCGCATCACGACCACGGTTCGCTTGGCGTTACCCCGCAGGGGCCAGGCACCCGGCGCCGAGTCCAGGCCTTGGAGGGGCTGCCAACGTCGGCCCCCGCTTCGCGCCCTGGCGCGCACTCTGGTCTTGCTTGCGGCCGCGGCAGAGGGTGCCGCTGCAGTTGCAGCCGCAGTGCCCTGGCACGGACCGCGGCGCCAGCTGCGTCCGCACCCCCGGCGTTCCGTGCGGCCCTTGCGTGCCTCCACGGCCGCGGCATCAGAGGCCATGCAGCGAGGTGTGTTGCTGACCGGGCGACCAGGCATCGGCAAGTCCACGGCATGCCGACGAGTAGCGG…
Lp_Unigene17300_All	MN125822	TGCCTGTCGGCCCAGGGGCCAGGCCCAGCGCGGCCAGATGGCCCCCGCGCCCGCGGCGGCCGCGGGGCCGGCGCCGCATGGCGCGGGGGCCGGGAGCTCCGCGCCCCCTGGCGTCGTGGACATCGAGGACCTGGCCGCTGGCGCTGGCGCTGACGGAGGGTGGGACGGTGCAGAGCCGGTGATACGGCGCCGACTGCTCGCCTGGTACGCCGCCGGCCGCCGGCGGCTGCCCTGGCGCGGCGACCCGCCGCCCTGGAGCGTGGAGAAGGCCGCGCTGCGCCAGGCTGCAGCCGCTGAGGCCGCGGCCCGGCAGCAGCCGAGCATCCGGAGTTTCTTCGCGAAGCGCCTGCGTTGTGGCGAGGCCCCTGGCGCCCCCCCGCTGCAAATCGACTTGGAGGA…
Lp_Unigene17309_All	MN125823	GACAGGGATTTGATTGCCTCCAGCTTGGGTGAATGCACGGCTGTGAGCTCCATGTCTACGAGTAGCCTCCCAGATTCTCCGGCCAGCCGATCCATGGCCTGTGAAGGTCGGAACATGGAGTCAACAGGAGGTCGGGACGTGTACGGCGAAGTGGAGGCTCTCTGGCGTCGCGTGCGCGATTACGAGAGCCTCTGCCAAGGGGCCCATGCTTCTGCGGCATGGCGCTTGGACCTGCTTGAGGAGCCCAAGACAGACCCACGTTGCATAGCCCTGGAGGGTTCCCCAGTGGAGGCATATGCAGTGAAGGGCACTGCAGCGGGCGACGGGGTCTTCGTCTGCCCAGGAGCATTGGCAATTGAGCAGCAGCAGGGCTTGCTGTTCTCGCTGCTGACTGAGTGG…
Lp_Unigene17816_All	MN125824	GTGCGGTCGCCACCCACCGGCCGGCAGCAGGCATGGCCGCGACCGAGGCCGCTTGCGCGGAGGGCGCTGATGGACCGGCAGAGGAGAACAGGATAGTCCAGCTGGAGGAGACCGTCATCAACCGCATCGCGGCTGGGGAAGTTGTCGTGCGGCCAGCGAACGCTATCAAGGAGCTGATGGAAAACTCGATCGATGCAGGGAGCACCCGCATTATGATCGCGGTGAAGGCTGGCGGTCTGAAGATGTTGCGGATCGAGGACGACGGCCACGGCATCAATGTCAAGGATATGCCCATCCTCTGCGAGCGCTTCACGACGTCGAAGCTGAGGAAGTACGAGGATCTCAGCGCTATAGGCACCTTCGGGTTCAGAGGGGAGGCGTTGGCCTCGATCAGCCATG…
Lp_Unigene17855_All	MN125825	CGCGGAACGAGATCCTGTACAACTCTGGAACCACCCAGCAGGGTGCGCCGGTGCGAGTCTTGCGACTGCGCCACGGCCGTTGAGTCCCCAGGACGTTGGCTTATCGTTTGCCTGAAGCAGGTTCTCTGCGGGCGCGTCAGCCTATGACCTGGCACACCCACCTCCGCCGAATGGCAGTGCTCGTGGAGCCGATCGAGGACGCGCTCGCAGCAACCTCCAGGGCACCAGGCGCCTCTGCGGCCCCTGGCCCACGCACCATGGCCTTCCGCCTACCACGGGCAGCCATGAATTCGGCGAGCGACACCTCATCGTCCACGTCGACATCGGCTCCCGGGCTGCTGCAGCCGTGGCCGCGGCCCGTGCCGCTGGACTCCTGCGGGCTCGTAGCCCGCTGCAACT…
Lp_Unigene18447_All	MN125826	GAGGCCGGCGAGGCCGACGAGGCCGGCGAGGCCGCCAGCGAGGCCGGCGGCAGCGACGCGGACGGCGACGCCGACGCCGGCAGCAGCGGGGACGAGGACGAGGCGCCGCGGGGTGGCGCGGACCAGAGTGCCAAGGGCCTGCTGCGCACCACCGCGGCGCCGGGCGTGGCGACGGGCGAGAGCCCCCAGTTCTGGTTCGAGCCCACGGAGGTCTGGGAGATCCGCGGCGCGGACGTCACGATCTCGCCCAAGCACATGGCGGCCATCGGCCTGGTGGAGAAGTCGCGCGGCCTCTCGCTGCGCTTCCCCCGCTTCATACGGAAGCGCGAGGACAAGCGCGTGCGCGACGCCACGACGCCCGAGCAGCTGGCCGCGCTCTTCCGCCGGCAGGCGCAGCAG…
Lp_Unigene20031_All	MN125827	GGCATTTCTCGGCTCGGCCATGGCGCGGCGCGCAGTGGTGTGGTTCCGGAATGATTTGCGCCTCCGCGACAACCAGCTGCTGCATTACCCCGAGGTGCGGCAGGCTGCAGAGCTCGCCGCGGTGTACTGCATCGACCCGCGGCACTTTGAGCAGAGCCGCTGGGGCAAGCATCCACGCACCGGCTGCCACCGTGCTCGCTTCCTCGCCCAGTCCATCGAAGAGCTGGACCGGTCCTTGCGGCGGATTGGGTCCGGCCTCCTTGTCGTCGCGGGCCGCCCTGAGGACATCCTCCCCGACCTCGTTGGCGATGGCGGGGTGCTGGCCTTCCAGCGCGAGGACACGAGCGAGGAGCAGCAAGTGGAGGAGGCGGTGCTGCAGGGGCTGCGCCCGGGCGCATC…
Lp_Unigene20110_All	MN125828	GCACCATTCGACCTTGATCACAGACTCAGACGAGTCTGCACCTTCCCAAACAATGCCATGCATCAGCGCAGTCCCCAGTGGGCTGGCACCCAGCCCAGGGTCGCTCAATCGCTGCCATTCCGGACCCCACCAGCGAAAATCTCGAAGACGCACTCGCTCTCGGGCAGCCAGGGGGAATCATAGATCTTGGCCACCCGTTGCTCTGCACGGCCTTTGCGTAAGAAGATGCGCGTAGTGGAGAAGTGCGCAAGGATGTGCCCACCCACGGGCTTTGGGTGGCTCGGCATGAAGGCGCAACCGCCGCCGGGGTCGGCCATGACCTGATTGGTCAGAACCACCGCCACGTTGAACTCCTCGCTCATTTTCTGCAGCTTGCTCAACACGCGGCCGAGGTGTTGC…
Lp_Unigene20125_All	MN125829	ATGAGAGAGCGCACCGAACATCGGCGCACAGCAAATTCACGGGCCTGTCCACCGACGGACATCACTTCCTTCCACCGCACGTTCCAAAAACTTGGTGCGCGGCCACCGGAATGCACGGGAGCGAGGGCTAGACGCGTCCACCAGGCTCCTCAGTCCCCCATGTTCTCAAACATGAAGTTTGCAGCCAGCTCCTCGTTCTTGTCGCAGGCGAGGTAGGCCTGCACAGCGAAGTTGTGGTCAAAGCCGAGGGCCACGAGCCTTTCAACGGCAGCCCTTTCCTCCTCCGTCAGCCGGATGACCGTGGGCCCGCCGGGGCCGCCCGGCGCGCCCTCGCCGCCACCGCCGCCGCCCTCCCCTGCCGCGAGCATTGCCTCCACAGGGTCTTCCGGTCCGCTGCCC…
Lp_Unigene20489_All	MN125830	CTTCAGAAGCAGCTTGGGCTGCCACGGGCTGCACGGAGGCCCGGGGCGGATGGAGGCCTTCTATGGCTGCTACCTTCTGGAATCACTGAAGCAGCAGCAGCAGACGTATATCGGCTTCACGGTGGACCCTCGGCGTCGGCTTCGGCAACACAATGGGGAGATCACCATGGGGGCGTGGAAGACGAAGCGTTGGAGGCCGTGGAAGATGGTGCTCTGCGTTTACGGATTCCCAAATAGGATAGCTGCATTGCAATTTGAGTTTGCATGGCAACACCCGGCCATCTGCAGGCACGTCCGAGGGCCTACGGAGCAATTGGGTTTCGTCCAGAAAACCCGTAAAGGCAGGCAACGCGTAGTGCTCGGGGCAAAGCGCAACGTGCAGGTGCTTCTGGAGATGCT…
Lp_Unigene20651_All	MN125831	TGAGCGTTCGATGATTCGAGCGAAGCCAGCTCCGACTTCGCCTGCAAATCCAGCCCTACAGCGGCTGGGCTCCTCAGTCTCCCGGAGAGCGCAGGCAGAAGTCGACGAAGTCCGAGAGCCGGTCCAAGGCGTCGAGCTCATACTTCACGCCTCCCTCCAACAGCAAGGCCGCAGCGTTCTCCCAGGCCGACGCTGAAGGGGCTTCGCGGAGCCTTGCCAGCCGCCGCAGCAGGCCCTGCGCCAAAGCGCGGTCCCTGGCCGTCAATGCCACGGCGTCCCCGCTCTGGAGGCCAAAGCGCGCGGCGCCCGCGGCGCCGCCAGGGCAGACCAGGGGCGAGGCTGCGGGCACCGCGAGGTCGTCCTGCGTCCAGGGCTCCTCCGGGCCGAAGGCGTAGGTCG…
Lp_Unigene21188_All	MN125832	CCGGCCGCGGCCGCGGCCCCGGCGGCGCCCGCGACGGGCTCTCCGAAGAAGTCGCGCGTGTGGATGAAGCGCACGCCAACGGCCTTGGCAAACTCCGCGTCGTCCGCGGAGTGCTCTCCGGGCGCCCCCGCTGCGTCCCCGACGTAGAAGCTGCCCGCAAGGTCAAGGGCCACGCCGCCGTTGCAGTGCTGCTCCAGGTACTGCCACATGCCCTTGCTCGGCTTCCGGAAGTTGTCCCGCTGCGTGGCGGCAAAGACCTGGACCGGCACAGCCAAGTCCTTCAAGAAGGCATCAATGTAGGCGCGGACCGCCTGCGCCCGCTTGCCCTGCACAGCCGCCCTGATGTTACCTTGGTTGGTGAAGATCACGAGCTTGAAACCTTGCTCGTGCAGCTCCCGG…
Lp_Unigene21536_All	MN125833	ACGCAGGCAGTCCAGGCATCCGTGGAACCGTGCACCCACAGCGCCGAGGCCGCCTCCTCGCCGCGTGCACGGCCCGCGCCCGCGCGCCCCCGCCCCAGGCCGCGCGGCCGCGGCCCTGCCGGCCCGCCCCCGCCCGCGCCCCCCCCCAGGCCGCGGGCGCCCCGCCCCCTCAGCCGCCGCCGGCGCCCCGCCCCCTGGAGCAGCCGGCGGCCGGTGCTGCAGCCTGCGGCCAACTGAGGAGGCCCTGCACTGCAGCGCCGCGTACTCGCCGTCCAAATCAGGGCCCAGCATCCCCCTGCTGCTCCCCCTTTGCATCTCCAGGCGAAGTGGCCGAGAGCAGCGAAGCCTCCAGCCGACGCTTGCCCAGGCTCGCGGCAGCGGCCTCCGCCGGCGGCGAGA…
Lp_Unigene21665_All	MN125834	GCGCGCGCCACCGCCGGGCGGCCGCGGCGATAGGGGCCCGGGCGCCCAGCGGCCGCGCTCCTTGAAGTAGCGCCGGCAGCCAGCCTCCGCCCGCGCGCCGGGCGGCCGCGGCGGCGCCGCGGCGGCCGGCCCGCGGCCCTCGGCCGCGCGCGCCTCCGGCCCCTCGCGGCCCGGCCCGGCCCGCTCGCGCGCCCGGCCCTTGGCCAGGTCGCCGGCGTTGGGGCGACGGCTTCCGTGCCGGTGGAAGACGTCCTGTGCCTCGGTGGAGCCGAGCTTCACTGCCCGATTGTACACACGGAGCTGCTCGCGCGCCCTGGCAACCGCGGCCTCCCTGTCCACAATCGGCCTTGGATACCGGTCCGGTGGCAACAACTTCCAGGGCTCCGCCAGGGCCGCCGC…
Lp_Unigene23700_All	MN125835	CGGCGCCGGCGCCGGCGCCGGCGATGGCCCACGCGACGCCCGGGGCGTCGGCCGGGCCGCCCGGCTCCGCCGAGGCCAGCGGCTCGGGCTGCCGGACCTTCCTGGGCGATAGGGACCAGAAGTACACGGGGTCGTGCACGAAGACCTCCGCCACGGCAGTGACCAGCGCCGCGCTCTCGCGCAACACCTCCATCGTCGTTTCGCAGCACCGGCGAAAGAGGCCACAAGTGCCCAGGCAACCCAGACCATCCACCATGTCGCGTGTGAGGCGGAATGGCACGAGCTCCGGCACCCGCAATGCACGACCAGCCTCGAAGGTGATGCCGAAATCAATGTGCACAAGCTCGCCCGTCTCGTGGTCGAAGAGGATGTTGTTGGGGTGACGGTCCCCGATGCCCA…
Lp_Unigene24084_All	MN125836	CTGGGCTCGAGGCTCCTCCTGGCTGCGCCATGCCCGCCCGGGCGCGGTGGAAGCCCGTTCTGGTTGGCTCCGAACCCGTGGCGGCGGACGGTGCGAAGGCCGTCGGTGGCGAGAAGGACGAGGACAGTGCGGGGCATCCGGTTGCCGCGGCCCCGGAGGCGGGGCGGGCTGCGACAGGATGCAGCGCCAGTGACGGCCCGGTCTTCGTGGTGTGGCACAAGTGCTCGGACCTGAGGTTGCAAGACCACGAGCCCACAGTCCGTGCACACCGGAGAGCTGGGCATGCCCAGGGAGGGTGCGTGCTGCACCTGCACCTCGTCGAGCAAGAGTACCTCCTGGGGCGCACCCGGCTTGCGGGCCTGCCACGCTGCGGCGAGCGCCGGGCGTGCTTCTGGCGGG…
Lp_Unigene24248_All	MN125837	CTCGCCCCTCAGCACCGATTGGCGCCGGCGCCCGGAGCATGAGCGCCGTCGCCCCGGGTGCCATCGCCCCGCTGCCGCCCGCCGCGGCCAGCGCGGTCCGCGGCGCGGTGGTCCTCCCCTCGCTCGCGCGCGCGGCGGAGGAGCTTGTGCTCAACGCTCTGGACGCCCGCGCGGCGCGGGTGGAGCTTGTGCTGCACGGGGGGCCCGAGTGCTCTCTGGAGGTCCGGGACAACGGCCGGGGCATCGGCCGCGAGGACTTCGCCTCGCTGGCCGAGCCCGGCTCGACCTCCAAGGCCGCTGCGGCCGGCCCGGCCCTGGGGGCCCAGGGCCGGCCCTACGGCCGCCGCGGCGAGGCGCTGGCCGCGCTCAGGGCCGTGGCCGGCCGCCTGCTGGTCAGCT…
Lp_Unigene24386_All	MN125838	CGTACATCCGCCAATATGCAAGGGTGCAAATCTGGCCTCAAAGCGGCATCTACCCACCGCCTCGAATTGCCGGACATGGCACACCTCCCCACTCTGCGATGAGCTCATCGAGCATGATCCCGTGGATGCCCGGTGTGTTTGACTTGAAGGCATTGAACACCTCGTTCAGCCTGGGCCGTGCTTCTGGCGGTGCCAAGGCCCTTGCCTCCCGGAGCAACAACTTCCACGCCACAGAGCCGCCCGTGACGTTGGAGTTGAAGTCAGCAGCCTCCATGAGCTTCGCAAGCAGAGGCGGCGCCGCCCTCCTCTCGGCCTCGGTGTAGAAGCGGGTCCTCCGCCCTCGGCGGCTGCTCTTCTGGGCTGGGCCCCCGCTACGCCGCTGCACGGCGAGCCTCTCGC…
Lp_Unigene24767_All	MN125839	CCAGCGTCGATGGCGGAGCAGGTTGAGCAGAGCAGCAAGCGCCAGCGATGTGAGGCCTCGCCCGAGGCGCTCGTGGCAGCTCCCGCCGTTGCGCTGCATGGCCAGGCGCAGGCGGAGGCGCAGGCGCTCGGCGCGCCTCTGCCTGAGGAGCCTGGCTTTACAAGGCTGGAGCGGCTCTGCGCGCCGCCGGCGCTCGGGGGCGCTGGCCTCTCCAAGGCCGAGCTGGGCGCGCTGGCTGCCTGCGGCGTCCACCGCGTCGAGGCCATTGCCTTCCTGCCCCTGCGGAGGCTGCAGGAGCTCCCGGGCATGGGCGAGCTGAAGGCGCGGCAGGTGGCAGCAGCGTCACGGCAGCTAGCGCCCTTGCGCATGCTGAGCTGCCTGGAGATGTTGCAGGTGCGG…
Lp_Unigene25347_All	MN125840	GCTGAAGCACTACCTCTGGGACACCGACCTCGTGGCGAAGTACTTCGGCCTCCGGAACGGCATGCTCGGCGAGGACTACAGCACCAAGCTCTCCGCGCACCTCGCGCACGGCTGCATCAGCCCCCGGCGGATCTACCACGAGATCCGAAGGTACGAGCAGGAGCGCACTGCCAACAAGTCCACGTACTGGGTGGTCTTCGAGCTGGCGTGGAGGGACTTCTTCCGCTTCTTCACGCTGAAGCACGGCAACCGCATCTTCCAGGCTGGGGGCACCGTCCGCGCGGCCGGCGCGTGGCGCCGGGACGCGGACGCGCTGCGGCGCTGGAAGGAGGGCCGCACGGGCTGGCCGCTCGTCGACGCGAACATGAGGGAGCTGGCGTCCACAGGCTTCATGTCAAA…
Lp_Unigene27814_All	MN125841	TCCATACACATGCACGTCGCACAACGAGCGCAGGCGCCCGAGCTCCGGCCCGGCCCGAGGGACCTCACGCGCCGGCGGCGCAGAGCGCGCCGGCCGCGCACGCCTGCCTCACGCCCGCAAGCATCTCGAAGGCCTCGGAGACGAGGTCAACGCGGCTGCAGGCCGCGGCGGTCACACGGACCCTCTCCCGGCCCTCCCACACGTCCCTGCGGCTCCGCAGCCGCACGCTCACGCGCCGGTAGGCCGCCGCCCGCAGCAACGCCTGCAGGCGGGCGCCGGCCTGGAGGTCGCCCGCTTCTTGGCTCTCCCAGAGCGCGCTGAGCTCGGCCGCCGGGACGCCCAGGAGCTCCCGTGCCTCCTCGTCGAAGAGGCCGGCCCAGAGCTCGGCCGTGGGGTCCG…
Lp_Unigene28278_All	MN125842	TGGGTCAAGCATTCGATCGGGGATGAGGTGGGATGTCGGCGTGCTGGACGAGTTCTGGCAGTGGCGGCTTGGTGACCCATGCACTGATCGTGCATTGGTTTGGCCTCCCTCAGCGGCCTATGCCATTCCACTCTGCCGTGCTCTGCGTGGCGCGCGCGCCCGGGCCGCGCCCGTGGAGAGCAGCTCCTCGCGGAGGCCTCGCGGCGTGTGGCGCCGCTGCAGCGCTGCTGGCGAAGCGCCGAGGCCACCGGGCGCAGCGGTGTGCGGTGAGCCGTGCAGCTCTGGGACAGGCGAGCCTGGAGGTTGCCCGCAGCGGCCTCGTGGACCTGGGGCTGCCCCCAAAGGAACTGCGCGCCAGCAGCGTCCTGCCTGCAGGCCAAGCCTTCCAGTGGTTCCCAG…
Lp_Unigene28445_All	MN125843	GTCTACGGCTTCACGGGCGCGACGAACGGGCCCCTGCCCTGCCTGGAGCTCGCAGGCGCTGTCACCGCCTACGGCCGGCAGATGATCCAAGCAACGAAGGCCCGAGTGGAGGCGCACTTCGTGCGCGACAAGGGCTACAAGCACGACGCGGAGGTGGTCTACGGTGACACGGACTCAGTGATGGTACGCTTCGGCCCGGATGACCTGGCCCTGGAAGAGGCGGTGAAGCTAAGCCGCGAGGCCACGGAGGTCTGCTCCGCCATCTTCCCCCCGCCCGTGCAGCTGGAGTTTGAGAAGGTCTACCGACCCTTCCTGCTCATGAACAAGAAGCGCTATGCGGGGCTGGCCTGGACGTCGGCCGACTGCGAGCCCAAGATGGAGACCAAGGGCATCGAGACC…
Lp_Unigene28603_All	MN125844	AGTTGTTGCCATCTGCCCGTGACCGTCACGGCACCGCCTTGGCCCCGCCAACGCCCCAATGGCGCAAGATGAGCCTGAAGACGAGGAGGAGGGGGAGGCACAGTGGGTGTTCGCGGAGGCGGCCTTGGCACGGGCACGAGAGGTCGCATCTGAGCAGGCCGCGCAGGCCCTGCGGCGCTCGGGCGCCACGGCAGCCGCCGCTGCTGAGGGCGGCGCCGCCGAGCGGCGCCCGGCGGCGCCGAAGCCCCTGCCGCTGGAGGACGCTTCGCGCCTCGTGCTCTTCTACGCGCAGAAGCTCCCGGAGCTCTGCGAGCTCTGCGGCGCGCCGTCCGAGGTCCGGTGGACTGCTGTTGTCTTCTACCGCCGCTTCTTCGTGGTGCGCTCGGCCATGGAGTTTGA…
Lp_Unigene29037_All	MN125845	GTTGGCTCCAGGCCTCCCGCAGATGCGAGAGCTTGCCCTCACCTTGCCAGCCAATGCCGTTGACGACGTCGTACGGTGTTTTTACCTCTCCGAAGGCCGTGCGGTCGGCGTCGGCCGGCGACATCAACAAGCTCTACTTCAAGTCGGACAACCAGGCGCAGTTTGATGGGCGGTTGTTGTCCGAGGAGGACCGGGGCGAGAGCATGGAGTCGATCTACAACCTCGGGCACAAGGACTCAAAGTACCTGAAGCACCGGCTGAAGCAGGCGCCGCTGCTGGACCGCCGGTCGTGCAAGTACCTCCGCGACTACTGCCCGAAGCCGTCGGTCAGCGAGAGCGACCGGGAGCTGGCGGGCATCCTCAAGCTGGTCAACCAGGGCAGCAGCGGCTCCGCGCCCT…
Lp_Unigene29089_All	MN125846	GCCCACGGCATTTATGCTGCTGCACATGCGCACCCCCATGACACTGCTCTGCCGTCTTGGCGAGACATGCTGGGCGTCCTAGCTAGAAATTCAGCCAATCTGTGATCAGCTCACGACACGGCCCACCTCCTTTAATGTGATGGCAGCCTTCTTGCCCTTCTTCTCCGAGCAGACTACCTCCAACTGCGTGCCTGGCAACAAGATGCTCTCAGCCTCGTTGGCATAGAAACTGAGCTCCGAGATGTCACAGGCCGTCTTCGTTTCCACCGTGAGGAAAGTGGCTTTGTCGCCACAGCCGTTCATGAAGTCCTCCGCGACCTTCTTTTCTGAGGTGCAACTGGAGACGCCCCACCAGATGATCGTGCTGCCCACCTTGTAGGTCTCAGATAGGTCCACGCC…
Lp_Unigene29950_All	MN125847	GTCTTCGTGCAGCTCCGGGGCGCCACGCTGGAGGAGGCCTTCACGGCCGGGCGCGCGCTCTGCGCCAGGATCTCCGCGCTGCACCCGGCGCCCGTGGAGCTGGAGTTCGAGAAGGTCTACCTGCCCTGCCTCTGCCTCTCGAAGAAGCGCTACGGCGGCCTCGCCTACGCCCGGCCGCCCTCAGAGGGCGGCGCGCCCAACTTCGAGGCCAAGGGCCTGGAGGCCGTGCGGCGGGACCAGTGCCGGCTTGCGAGCGACGCGCAGCGCGAGCTCTTGGAGGAGCTCTTCCGGAGCAAGGACCTCTCGGCCGTGAAGCGGCTCTTCGTCGCCCGCGCGGCCGCGCTGCTCCGCGGCGGCCCGGGCGGCCCGCCGCTCACGGACCTCGTCTTCCACCGCGAG…
Lp_Unigene31367_All	MN125848	TTCGCTGCGCCGGGGTGGCCTGCACTGAGCTCGCGCCAGTGTCCCCCACCTGGAGCTGGAGCGCTGGGTTCCAGCCTTGTGCCCCGGCAAAAGCCCCCCCCCCCGGGGGGCGCACCTCGCGCGCCAGGCCGCGGCCCCGCCTCACTCGTCGATCTTCGGCGCCAGGTAGAACTGCATGTAGCCGTTGTCGTTCCTCTCGAGGTCGTACTTCACCAGCAGCGGCGCGTCGGGCCCAAGGCCAAGCTCCACGGCGCCGGAAAGCGGCGCGGCCTTGGCGAAGTTCACGAGGTAGCGCAGCGCAAAGGTGGCAGTCACGGGCTCGTGCACCGTGAGGCTCACGCGCTCCTCTGGCTTCTCCGACTCCCGAGGCTTGAGCATGACGTTGCCGGCGCCCACGTC…
Lp_Unigene31368_All	MN125849	GGCTCAAGGCTCAAGCGAACTTGCGCCTTGGCGGCTTCCGGTCCTTCCTGCCCTACCCATAGCTGCGCAGCTGTCATGGCGCTCGAGGCACACCTGCAGCAGGCCGTGCTGCTGAAGAAGGTCGTGGACGCCATGAAGGACCTCTGCAAGGACGTGAACTTCGACTGCAGCGAGAAGGGCCTCCTGGTGCAGGCCATGGACGACTCCCAGGTGGCAATGGTCTCGCTGCTGCTCCGGGAGTCCGCCTTCTTGGAGTTCAGGTGCGAACGACCAACGTCCCTGTGCATCAACGTGGACTCCCTTGCGAAGATCCTCAGGATGTGCGGCCCCAGCGATTCTCTGTGGCTCCGGTGGCGGGGCAACTCCGACACCATCAGTTTCCATTGCGCAAGCGGCGAG…
Lp_Unigene31369_All	MN125850	CGCGCCAATGCTTTACGCACATCGAGTGCTCGCGCGCCCCCAGGCACGCCCGAACGGGCAAAGCTCCCCCCGCCAGGCCCCTTCGGCCGCACTCATCCCCTCTTGAGACCGGCCCGCGCCGCTCAACCCTGGGCTGCAGCCCTGCCTCACTCGTCGATCTTCGGCGCGAGATAGAATTGCATGTAGCCGTTGTCATTCCTCTCGAGGTCGTACTTCACCAGCAACGGCGCGTCGGGCCCCAAGCCAAGCTCCACGGCCCCGGAGAGCGGGGCGGCCTTGGCAAAGTTGACGAGGTAGCGCAGCGCGAAGGTCGCGGTCACGGGCTCGTGCACCGTGAGGCTCACCCGCTCCTCCGGCTTCTCGGACTCCCGGGGCTTCAGCATCACGTTGCCCGCGCCC…
Lp_Unigene31370_All	MN125851	GTACCATTGTGTCACGGCGAAGTTGCCCTCGGCGGAGTTCCTGAGGATCTGCCGGGGCCTTGAGCAGTTCGGCGGGGATACAAAGGTGAGTGCCAGCAAGGAGGGCATCACCTTCAGCGTGCAGGGCGACGTGGGCGCGGGCGGCGTGACGCTCAGGCCCCGGGAGTCCGTGAAGCCTGGGGAACGGGTGGGCCTCACGGTGCTCGAGCCCGTGACTGCGACTTTCGCCCTGCGCTACCTCGAGTACTTCGCCAAGGCCGCGCCGCTCTCCGAGGCCGTGGAGCTCGGCTTGGGCCCTGGCGCGCCCTTGTCAGTGAAGTACGACCTTGGGGAGTGCGACGACGGCCACGTGCAGCTTTACCTCGCGCCGAGGACCGCTCTGCCGGTGCGGGCGCCAGG…
Lp_Unigene31371_All	MN125852	GAACTCCGCCGAGGGCAACTTCGCCGTGACACAATGGTACTGCTTCGGAATCTCAATGCGCTCACTCCCAAGCGGCATGAGCTTCAGCTCGGAGTCGACGATGCGGCCCTCCTCGCCGCTTGCGCAATGGAAACTGATGGTGTCGGAGTTGCCCCGCCACCGGAGCCACAGAGAATCGCTGGGGCCGCACATCCTGAGGATCTTCGCAAGGGAGTCCACGTTGATGCACAGGGACGTTGGTCGTTCGCACCTGAACTCCAAGAAGGCGGACTCCCGGAGCAGCAGCGAGACCATTGCCACCTGGGAGTCGTCCATGGCCTGCACCAGGAGGCCCTTCTCGCTGCAGTCGAAGTTGACGTCGACGCACAGGCCTTTCATCAAGTCCACGACCTCCTTGAG…
Lp_Unigene31865_All	MN125853	CTGCCACCACCCTCGTGCCTGTGGCGAATGCGACTGCGGGGCCCTCAGCTCTCTGTACCGGCCAGGCCGCACGTCTCACTGCCGTCGGTCGCTTCCTCACTCGCGCAGGCAGCGCCAGCCCCTGTCACCGCTTCACGGGCCAGGGGTGTCACATCGACACAAGCACCGCCTGCTGCAGCCGCCAGCGCGCTCCTGGCTTCAGCGAGGAAGGCGTTGAAGCGCTGCGGCAGCGCAGCCTCGCCATCCCAGCCGCCCGGCTCTGCCGCTGAAGCGACGGCCGAGCGCAAGGCCCGCAGCGCAGCCACTGCGACATCGAACTCGCGCCGTCCCAGCAGCACCTTGACTGCAGCCGCGTGGAGGTCGAAAGCCTCGGGCCGGGAGAGCTCCAGCCTGGTGCGG…
Lp_Unigene31872_All	MN125854	GTGCTTTGTCGCACTGTCAGACCTCCCCCTGCTGTGCCATGCCCCGGCGGCTTCTCCTTGCACCGTGCGCCGGGCCGCCGCAGCCGGCCTGCCTTGCCGCGGCGCCTGCCCTGCGGCCCGATGTGCCGGTGGTCGAGCTGCAGGGCTGCACAGAGGCTGTGCCAGCAAGCGGCCGCCGGACGCTGCACGGGCTGTTACCCGCGGGCGGCGGCGCGCCGGCTGCGCACAGCGGGGCCCTTCCCAGTGCCGGAGGCCCGGGGGCTCGGACGCCGCTGTTGCCGAGACCAGCCCCGGGCGCGGGCCCGCCAGGGGGCCCGCCGCCGGTCGCGGACTTGCTGCGGAGGACGTCCAGCCGCTCTGCCCAGTTCCGCACCCAGCCAGTGAGCAGTGGTGGCCGCA…
Lp_Unigene32155_All	MN125855	CAACCTTTGGGCTGCCTCGGGGCGCGTCCTGTCCCTCGGCGCTGCTGCCCGAGCTCACTTCGCACCACGCGGGGCCGCAGCCGCCCGCCCCGTCGCCGCTGGCCGGGAGCGCGGGGGCCCCGGTCGGCAGCGCGGCGTCCACCTCGCGGTGCTCCGGCGCCACGTACTCGAGCCCCAGGGCCGCGAAGATCTCCTCCTCGGAGCCGCAGCGGGCACTGGGCCCCAGCCAGACGCGCTCGCCGCGGACGCGGCGGCACTGGCTCAGGCCGTGGTCGCTGAGCGTGTAGCCCCGCTTCCTCGCGTAGAGCCGCATCGAGCGGTTGAAGGGGCCCGAGCCCGTGAAGTGCAGGAGAGCGAAGGGGTAGAGCTCGGCGGGCCAGACCTTGATGTCGAGCCGCC…
Lp_Unigene32526_All	MN125856	GGCCGGCCTCCCCGCTCCGGCGGCGCGGTCCAGCGCGGCCGGAGGCACGCCGTCCCCCGCTGAGGGGCAGAGCCCGCGGATGGAGCAGCCGCTGCACGCGGGCCGCAGGGCCGTGCAACGCTGCTGGCCGAAGCCGACGAGGAGCGGGTTGATGGGCTGCCAGAGCTCACGCGGCAACCAGCGCTCCAGCTCCACGCGTGTCCTCTCCGGGCGCTGCGACGCGGGCCGGCCAGTCCTGGGCGAGGCACCGTGGCTCCAGGTCCGCGCCCAGCCGAGGCGGTTGGCTATGCGGTGCACGTGCGTGTCGACGCAGATGCCGACGACCTGGCCCCAGCAGACCTGCATCAGCAAGGTCATCATTTTGGGGCCGACGCCGGGCAGCTCCAGGAACTCATCGGC…
Lp_Unigene33147_All	MN125857	CTCGGCTCGAACGGGTTCCGGCCGGCTCCGCGCGCACCGGCTGCACAGCATGGCCGTCGTCCTCAAGCTCACCTTCAATGGGGACATCCTCCGGACCCGCGTGCCCGAGCTGACCTGGGAGGAGTTGCAACGCGCCGTCGCGGCCTGCCTCCCCGGGGTGCCGAAGGAGGGCCTCGGCCTCATGTATCGGGACGACGAGGGCGACCTCTGCCTCCTGACGCCGGCGTCCCTCTCGGACTTGGTGGCCCTGTCCGAGCATGCCACCACGGTGAAGCTGGAGGTCGTGCAGCGGCAGCCGCCGGCAGCGGCCGGCCCCTGGCCGAGCCAGGGGCAGCAGCCGCAGCCGCAGGCGGCGCCGGCGAGCGGCCAGCCAGACCCGTGGGCGCCTTCGCCCTTCGC…
Lp_Unigene33492_All	MN125858	GAGGCATAGACTGTACTGCTGGTGGCGGGCTCCCCTGAGACGGGAGGCATAGACTGTACTGCTGGTGGCGGGCTCCCCTGAGACGGGAGGCATAGACTGTACTGCTGGTGGCGGGCTCCCCTGAGACGGCCGACCTTCCCTAGCCGCCTGCCTATGCCCTGTGCTCGTCCCCCTCCTCGCCTTCCACTGGATCCTCGACAGTGATCACCCGCATGTTGACAACCAGCCCCCTGCCCACGCCTCCCTCCTTCGGAGCAAGACCCGGGCGCTCCTCCCCAGCGGCAAGGCCCTTCTCCTCCTCGCACCTGGCCTCCGTGTCGGCGTCGTCGTCCTTAACATCACCCTGCTCCAGCTCGCTCTCCGCATCCTCCTCCTGCCCGGCCTCTTCCTCCTCGCCGA…
Lp_Unigene33584_All	MN125859	GCTAGAACAGCGAAAGGCCTATAAGCAGTGCGCAAGCCTGCAATTAGGCGTGACAGCGCTGAGCTCCTTGGCTGTGGCGCAGCCAGGGTAGCCACTCAGGCACTGCGCTCGCCCCATCATGCCCCCGCCAACGTTGCCCCAACTGGGCAGTGGTCGCCTCCCGGGGCGAATGCAGGCAGGTGGAAAGCGTCCACCAAACGCACCTTGGAACCTTTGCCTGCCACAGCCCCCTTGGAGACCAGGGCGTAGTCCAGCCGCAATCCACGGTTCGGGGCTCTGTTCCTGGCGCGCACGGACCAGTAGGTGAATGCGCCCTTGGCCTCTGGGTGCAGGTGCGCGAAGCCGTCCACAAAGCCCGCGTCCAAGAGCTTTCCGAAGCTGGCCCGCTCCTCTGGCGTC…
Lp_Unigene35510_All	MN125860	TTGGCCTTGGCCTCGGCCTTGGCCCCAGCCTTGGCCTTCGCCCTGGCGCCCGCCCCTCGCTTGGCCTTGGCCTTGCGCACCAGCGCGCTGCTGGCGGCGCCCTCGGCGTCGCTGGCTTCCTGCGCCTCGGCATCGCCGGCCCCCTCCTCCGGCTTCCTCCCCGTAGCCGGCAGGTCCCTGTCCCCCTCGTCGCCCAGCGCGTCGTCCTCGGGCGCGGCGACCCTGCGGCGCTTGGCGCCGGGCAGGACGACACGCAGCGCGTGGCCGCCCTGGTTCAGCTCGCGGGTCATCGCGGCCTTCACCCTGGGGTCCACCAGCTTGAAGCCGTCCTCCTCGCCGAGGTGCTGCCGCAGCTCCGCGAGGTGCTCGGCCAGGTGCTCGCGCTGGAGGCCGTAGGCG…
Lp_Unigene35603_All	MN125861	CTTGGAACGGGGCAGGGCCAGGGCCTGCAATGCCGGCTAGCGGACCGCCTGCGTTGCTGAGCGGCAGCGTGCTACAGCTGCCACGTGCGAAGCGCCGCCAAGACGGGGCTGAGAGTCAGGCCAAGAGAAGCCGCGCAGGATCGGAGGCGCGCGAGGAGAGGCCCAAGGGGACAGAGCTCCAGCATGGGGCAGTGAAGGCGGGTGGGCAAGGCCAGGCATGTTCCAGCCTTCGTGCAAGTCCCCGAAAAGACTTCACTCCGAGCTTGCCAAGCTCGGTTGGCTTACAGACGAGAGATCAGCCTTTCAAGGTGGGTGATGTTGCGGCTGCAGCAGGATCCAGCAAAAAGGGTCCGCCTTGCACACTGGCTGGTATTCCCTGCAGCTCAGCATTGCCAGCAC…
Lp_Unigene36232_All	MN125862	GGGCACACTTGCTGCAGCGCTTCCGGAATCATGTGAAAAAGCCCGTTCGGCCGGGTGGTGCAATGCCACCTGCTCGCAAACGCATTCGCAGCGGCTCCCCAGAGTCGGCCCAGCCATGTTTGGAGGCTGCACCTGGGCTTTCTGGTCGGCTGCACGCCTGCAGCGGCTCGTGCGAGCAGGCGCTTCGGCGCCCGGAGGCGTCGCCGGGCGCCCCTGGGGCTAAGCCCTCCGGCAGCACACGGGTGGCGGAGGGTCTCCTGGCGCCCAGCGGCATCTGGGGCGAGCTCACCTCCCTCCAGCGGAAGGGCGTGAGATGGCTTTGGTGGCTCCATTGCAGAAGGGCAGGTGGGATTCTCGCGGACGTGGCAGGCTCTGGCAAGACCTTGCAGGTTGTTGCCT…
Lp_Unigene36239_All	MN125863	CTCGTGCGTCTCCAAGGGGCCCTCATACGCGCGCGCGCCGGGCCGCGCCGCCGCGCGCCGCGGCGGCGCGCCGCCCTCTCCCCCGGCCCCGGCCCCGGCCCGGCATGCCGCTGGCGCTCCCCCGCGCCAGGCGTGGCCCCCCCGCGACGCCGGCGGCTGCTGCGGCCGTCGCGGGGGGTCCGGCGCCTTCTGCGGCCGCGGGGCCGCCGGAGCTGCCTGGCGCGGCGCTCGGCGCCCTCGCCCCGGACGGCGCCCCTCGGCTGCCGCTAAAGCGGCCCCGGGAGCCGCGGCCGGTGCCAGGTGATGCACTACAGCTCTTGGACCTCATTTGCGACGTCGAAGCCATGCGGCAGGAGGCAGAGGAGGCTGGCTACGACTCGGCAAGGCTGCCGCTGGAGC…
Lp_Unigene36569_All	MN125864	GTAGGGCGTAACGGACAGCAGGGATGGGGATCCATGGGCTGCTTCCGTTTCTGCGGCCATTTGCTCATCGTTCCTCCATCAAGGACCTTCGAGGGAAGACCGTCGGCGTCGATGCGATGTGCTGGATGCACAAAGGCGCCTTCGCTTGCTCCCAAGAGCTGGTTCTCGGGCAGGACACCGACAAGTTCGTGCACTACTTCCTGCGCATGTGTGAGACGCTCCGGTTTCATGAGGTCAAGCCCGTGATTGTTTTTGACGGGGCACGGCTTCCTGCCAAGGCAAAGGAGGAAGGCATGCGGCAGGAAGTGCGCGAGACGGCTCGATCTGAGGCCCTCGAGTTGTTCGAGCGGAAGCGGAAGGGTGAGCTGGTGGATGAGCGTGTGCTCGCCTCGAAGTGCG…
Lp_Unigene36792_All	MN125865	GCGGCGCAGCCGGCGCCGGCGCCGGCCTTCCGGCCGCCCCCGCGCGGCGGCGAGGGCCCGGCGCTGCACCCGGCGGCCGCGGCCGCGCTGGCGGAGGTGCGGGCGAACCCCGGCCTGGAGATGATGCAGACGATGTGCGAGCAGCGGCCCCACATGCTGCCGGACTTCGTGCAGCAGCTGCTCCAGGGCCACGCCGCGGCGGCGGCGCTGGAGCCGCGCCTGGGGCCGGAGATCGAGAGGCTGATATGCAGGGGCCGGCCGCCCCCTGCACTGCCGCAGGCGCCGGTGGCGCCGGCGGTGCCGCTGGTGGCGCCGGCGGCGCCGCTGGTGCCGCTGAGCCCGGAGGAGCAGCGGAGGCAGCTGATGGAGGAGGCCAGGAGCGTCTGCGGCCTCGGCCCC…
Lp_Unigene37178_All	MN125866	CGTGAAGCCGTAGACGGAGTTCGCCGAGAGCTTCAGCGCCAGCTGGCGGCCGTTCAGCACCTTCCGACGCGTCTCCTCGCCCGCGGCGCAGAGAGACAGCTGCTTCTTGGCCGCGCGCCGCGCGGCCAGCAGCTGCTCCAGGATGGAGGGCAAGAGGCCCCTGCGCACGGACGAGTGCACGAAGGCGGCAGACCGCGCCTCCCGGTCCTCCGAGGCCACCTCGACCAACGGCGCAACGGAGTGGGCCGGGGCGTCCGGCCGCTGCTCCCAGCCCGTGGGCAAGAGCGTGGAGTAGCAGAGGTTGTGCGCCAGCATGATCGAGGGGTACAGGGAGGCGAAGTCCAGCACGGCCACAGGGCTGCGGTAGAAGCCGCTGGCCGGCTCCAGCACTGTGGCGCC…
Lp_Unigene39489_All	MN125867	CAAATCACATGCAGCATGACGCTGGAAGCAAAGACTTGTAGTGCGCAAGGGCACACGAGGTCAGTCGAGGATGACGATGGCACCCTCAGAGCCCGCTGCAGGGCTGTCGCCGTCGTGCCGTGGCCGCTTGAAAAGCCCAGACTGGTCCGTCTGGGACGGCCGTTTGGCCGCCTGCTCCGGACTGCCGCAGCTGGCTGTACCACGACCCCTGAGAAGCCACTCCACAGCGGTCTGCAGGTCTCCCGCCGAACGCTGGAGGGCCTCGGTCACCTCGGAGGGAGCAAATCCCATTGCTAGGAGGTCCTGTCGTGCGGCCGATGTCGTCTCCGCGAGAGCACCTCTGGACGAGGCGTGCGGCGGCTGCGGCTGAGGCTCCGGCTGAGGCTGAGGCAGAGGCTG…
Lp_Unigene39523_All	MN125868	GTTCAAGGCGGGTTGGGGCTCGAATCCATGCTTGTGCAGTCGTCAATTCGCAGCCGAGCACGCTACCGGCGCCTTGTCGTGCGTCCTCCCCCACAACGTGCCTGCCCTTGGCAAGATGTGGGGCGCCCAGCGGCCCGCTTCCAAGCGCCCCTCAGCACCTGGGCGGCAGCATGCACCAGGAGCTTTGCCCGGCAGTGCCGCCCCAGCAGAGGCCTCAGCCCTGCCGTGCTCGGCGGCGCTTGCCTCGGAGCCTCGGCATGCGCCAGGCTCCGGGCGGCGGCACGGCCGGCAGCTTTGGGCGGCCGGCAGTGCCACAGCGGCGCGGGTGAGGCCGCCGCCTCCGCGGGCAGTAGCAGCATCAGTGTGGCAGAGGTGGCGGACAGAGTGGAGGGGGCACCT…
Lp_Unigene39631_All	MN125869	AGCAGATTGGCGTAGGGGTGCGCGCAGGGACGCCATGGCCCGCCTCAGCCCACGGGGCGCCGGCGTGGGCCCTCACAGCAACAGCTGCGCTATGGCTGTGGAGGCGGAGGTTGTGGTGGCGGCACAGGAAGGCAGTGGCGGCAGCGCGCCGGTCTTCGTGGTCTGGCACAAGTGGTCGGACTTGCGGTTGCTGGACCACGAGCCCCTGGTCAACGCTCACGCGCGGGCCGCGCAGGAGGTGAATGGTCGCGTGCTGCACGTCTACCTGCTTGAGCGGGAGCTTCTTGTGGGCCGCAGCCGTGTGGCCGGAGTGCCGCGTTGCGGCGCCCGTCGCGCTGCATTCTGGCGCGATTCCCTCGAGGATCTGGCTCGGCGCTTGGAAGGCCATGGGCAGAGGCT…
Lp_Unigene40876_All	MN125870	GGAAGCAGCGCCGGGCCGGCAGCGCAGCGGGCCATGGTCTGCAGCCTGGCCGCGCGCGAGGGCGTCTGGGGCGCCGGCGCGCTGAAGCGGCCGCGGGGCCTCGTCGTGCTGCCCTGCACGGAGCTGGACGCCCCCGAGCCTCCGGGGCGGGAGGGCGCGGCTGCCGGCAGCACGGCCGGCCCTGCTTCGCCTGGGGCCTGCAAGGTTGTGGGGCAGCCGGCCCAGAGGCTACGCCTCCGCTGCAAGGCCCCCGCTCCGGGCGAGTGGCTGGACCTCCGCTGCCCACCCGCGGAGCTGCGCGCGGACTGCACGCTGACGCCCGGGCAGAGCTTCACCTGGAAGCGCGTCGCGGCCGACCAGTGGCTGGGCGTCCTGGGGGCCAGCGCCGTCGTCATCCGG…
Lp_Unigene41185_All	MN125871	CATGGCCCAAGCTCGGGGCTGGGTGGCCAGGCAGCCATGGCATTGACGGGGGCGGCAGAGGCGACGGAGGCGGCTCTCACGAGCTGCCTCCCGGCGCGCCTGCGCGAGCGGGTGCGCACCGCGAAGGGCGGCCGGATCCTCCGGCGCCCCGTCGTCTACTGGATGCAGAGCTCCCTGCGAGCCCACGAGAACCCCGCACTGGACGTGGCCGCGGCCGTCGCAGGGGCGCTCGAGGTGCCGATGCTCGTGCTGATCCACGTCGCGGACCGCTACCGCCACGCCACGGCCCGCCGCCAGCTCTTCCTCCTCGAAGGTGCGCGCTCTGCGCAAGCAGAGCTCCGGCAGCGGGGCGTAGAGGCCTTGCAGGTGCAGGTCGACCGCAAGGGTCACAGGGAGCCT…
Lp_Unigene43360_All	MN125872	ACGAAATCCTACGAAATCCTATGAGAAGCCAGCGCCCGCCGCCGCGGCGCCCCGTCAGAACATGGTCCACGGCCCGAGGAGGTCGCCCATGCGGACCTTGCGCCGCACGGCGCAGGTGTGGCCGTCGAGGTACTTCAGGACCAGCAGCGGCTTCCGGGCGCTGCTCCTGCCGCCCTCCTCGTCGCCCTCGCCGGCGGCCGCCTGCCGCTGGGGCACCCAGCTGGCCAGGGAGCACTTGGACTCCTGCCCGGCCCTGCCCTTGGCCTTGGCCCGCTTCTTGGCCCTGGCCTGCCCGGCGCCCTCCTCCTCCTCCGCGGGCTCCGCGCCCTCCCCGGCGTCCTCGGCCCTGCCGTCCTCGCCGCCGCGGCCCTTTTTCCGCGTGGACCGAGCACCGCCCTC…
Lp_Unigene43660_All	MN125873	CGGCGGCGGCGGCGCCGGCGGCCCAGGCCAGCGTGAGCTGGCCGTCCGGCTTCTCCGCGTCCTCGGCGGCCCGCTTCCGCCCGCGCCGCGCGGCCGCCGCAGTCGTCAGGGGCGCGGCGAAGTGGCTGGGCGGCGCGCCCGCCGCGCCGGAGGCGGACCACTGCTGCAGCGCGGCGATGGCCGTCTTGCTGGCCTTGGCCGTCTTGGCCTCGTCCACGATGCGCTGGGGGTAGCCGGCGGCGGCGCCGCCTGCCTTCCAAGGCGTGAGCGCGGCGGCTCCGGGAAGGCCCGCGAGCTCCTTCACGTGCTTCCTGATGAACTCGCCCTTGGGGTCCTGCTCCTGGGCCTGCTTGGTCACGCTGTAGCACCGCAGGTCCACGCCCGTGGTCGCGGCCTGCA…
Lp_Unigene44117_All	MN125874	CTTCCTGCGGGTTTCTCAGCTTCCCTGCAGGCCGTGGCACGTTGGTTTGGGCGCTCGTGCACCGCCGTGCCTGCCATGCCGAAGCAGAAGAGCCTGACGGCGGCCTTCTTCGGCAAAAGCCCAGCGGCAGCAGCAGCTGCCACGCCGGACAGCAAGCCCAGCGCCGCAGCGGACGCCACCCCGGAGGTGCCCTCCAAGCGGCGCAAGCTCGAGGAGACGGTGGCAGCCCAGAGCGGAGCCAAGGGCAGCCCTGGGCGGCCCGGGGCCGCTGCGGCAGCCCCTGCCGTGGCGACCGCGGCCGCGCCCGGCAGCGACACGGGCCCCATGTCGCTCTGGGCGGCCGCGCCCGGGCCCGACCCGGCGGCGCTCGCCTCGCCGGCCTTCGACCCGTCGCTGCTT…
Lp_Unigene44216_All	MN125875	CTGGCTCAGGCTGTGTGCACGCATGAAGGTGGCTAGCCGTGCGCGCGCCGGATTGCGGCTTTGTTCATCGTCGCAGTCGTGCAAGGCAGCCGTGGCCAGTTGCTGCGCCCCGTCCTCTCAGCAGCGCACAGACTTGCACCAGTGCCCGGAATTGGAGAAGGTAGCTCGCAGATGTTGCTTGAGGAGCTGCCCATCGCCGTGGATTCCTTCAGTCACAGAGGCGCGGAGGTGCTCTTCTTCTGCAGCCACGCACACGCGGACCACCTCGTTGGACTGCACGGCCGCTGGCAGCGCGGCTGCATCTATTGCTCGCCGGTCACAGCAAGGCTATTGGAGCTCCGCTGGCCGGCGCTCGGTGCACGCTTGCGGCCGCTGACCCTGGGCGTAACTCACAGCCTG…
Lp_Unigene44680_All	MN125876	GTAGGATTCAACTGCATACCCCAGAAACAGACTCATGGCAACAAATTCACGTCGAGGAACCTGAGCGCATACCTCCCCTCAATATGGCTCAAAACGGCCGCCGTCGAAGCCTCCGCTGCCGAAGCCGCCGGACCCCGGAAAGCCAGCAAAGTCCAGGCCACCGTCCGCGTCCTCGGCGTCCGCCCCCCGGCCGCGGCCACGGCGACCCCTGCCGCGGCCGCCGCCCTTGCCGCGGCCACGCTTGCGGCCGCCCCCGCCTGCGTCCACGGCTGGCTCATTGGGGCAGTCCTGTGCCCAGTGACCTGTGCCCTGGCACTTGTAGCAAGTGTCCATCGCGCGGTTGCCACCGCCGCCGCCACCGCAACCACCGGCCCGTGCAGGACTGGCCACCGGCGGACC…
Lp_Unigene44751_All	MN125877	GCCATGTCCAGGCAAACGAAACATTTCTTTCAGGTGCTACATCCCCTGCATGCCGACAGAGCCGTGAAGCTCAATCCAGCAACCACTTCACCTCCGTGCGGCCTAACGCCTTCAGCGCCGCATTGCACTTCGAAAAGGTCTTGCACCCGTGCCACTTCCTGGCGCTCAGCGGGCTGGGGTGCGCCGACTCGATCACGGTGTGCCGCGACTTGTCGATGATCTTGCCCTTCTTCTGCGCGAAGCCGCCCCAGAGCAGGAAGACCACGCCCTCCGCGTGCGCATTCACCACGCGGATCACCTCGTCCGTGAACTTCTGCCAGCCGCACTTCGAGTGGGAGTTTGCCTCCGTGTGGCCGCCTCGCACCGTCAGCGTGGCATTCAGCATGAGCACCCCCTGCT…
Lp_Unigene46377_All	MN125878	ACACGGGCCCGGGATCACAAGTGCCCCAGCGTCCGGAAGGACAAGGAACGGCGGAGCGGAATCATGTAAGCTGCATGGGAATCACACCAATGCCGTTGAGGTTGTCGTGGGGCATGCTTCGAGCGCCGGTCGCTGGTGCGGCTCAGCGGTGCCTGAAAATGCATGCATGTAGCCCGCGCCTGAGCCTGACAGGCTGACCGGACCCCTACGCTCCAGCTTCATTGGCGGGCGGAACGAACTGCACGTCGTCATCCTCTTCGCCACGCGACTTCCACCGCCGCCGCTTCCCCGGTGGCTTGGGCTCAGAATTCGGCTCTGAATTCGCTCCGGCCGGAGATGTGACCGGAGCCGCGGCCTCCTTGCTGGCGGCCGCGCTACGCGCCTGCTGCTCCGCGCGCT…
Lp_Unigene47003_All	MN125879	CGGGCGGCGGCCTGCGCGTCGGGGACCGCGTGCGGCTGCAGGGCCTCGCGGCGCGGCCGGAGCTCAACGGCCGCCACGGCAAGGCCCTCCGTTTTGTCAAGGACAGCGGCCGCTGGAAGGTCTGCCTGGATGGGGGGGCCAAGGACAGCAGCTTGGCCCTCAAGGCCGAGAACCTGCAGGCCCTGCCCCGGCACGGCGAGGCCCTGGCGCGCACAGCGCTGCTCGGCTGGCAGCGCGCGGGCTTCGAGGCCAGCGGCTCGCGCCTCCATGTCGTGCACGTGCTGGGGGCCACGGACTGGGAGCTGGGCCTGCAGTACGCGCCCTTGGCCGAGGCGGCGGCCCCACGCGTGGGCGACCGAGTGCAGCTGATGGGCCTCGCGTCCAAGCCGGAGCTCAACG…
Lp_Unigene47083_All	MN125880	CCCCGCCGCGGGGGCCGCGCGGGCGCCACGGAGCTCTTCCGCGGCTGCGCCGTGTGCCTCGCGCAGCAGGGCCGGGAGCTAACGCGCGTGCGCCGCGGCGTGCTGGCCGGCGTCGTGGCGCAGCATGGCGGAGCGGTGCGGGAGGTGCTTGGCGCCGGCGTCACTCACTTCGTCGTTGGCTCTGGGGTGACAGCGGCCGTCGCTGCGGCAGCGTCCGCAGCTCCGGGCGTGCGGCTCGTCACACCGGCGTGGGTCAGCCAGTCCGTGCAGCAAGGAAGGCGGCTGCCGGAGGAAGACTTTGCGCCTGTCCAAGACTCGGAGCCGGCCGCGAAGCGGCAGCGCCCCCTGGACGACACTGCAGGCGAGGCCAGCCCGCTGGAGCCGCAGCCAGCCCTCGCG…
Lp_Unigene47312_All	MN125881	CTTTGGTTTGCCCCCCTGTAGCACGGCCAGCATGCCGCCGAAGAGGGCGGCCAAGAGGGTTTCCGCTGGCAGCAGGCAGGTGGTGGCAGCCGTGGAAGCAGGCAAAGGGGTCACCTCGAAGCTGAAGGTGGGCGCCCCAACGCAGCAGGTGGAGCCGGAGCGCGTGCGGACGCTGAACGATAAGCCTGAGGCCGCCGGCAAGTACGTGCTCTACTGGGTGCAGGCTGCGGTGCGCTGGAGCTACAACCATGCCCTGCAATACGGGAAGCAGGAGGCGAATCGCCTGGGGCTCCCGCTGCTCTGTTGCTTTGGTGTGACGCCCTACCCGGAGGCCAATCTGCGGCATTACCGTTTCCTCCTTGAGGGCGTGGCTGACTTGCAGGCCCACTTGAAGGCAGA…
Lp_Unigene47534_All	MN125882	CCTAATCATGAGGCCCGCAACCAGTGGTGGTCAAGTGCCTGTTCAATGGTGAGGCGGTCCGTTGGGCTAACAGTCAGCAATCCGCGTACGAGGGCTTTTGCCTCATGTGAAACTGTGCACCACTCTGCGACATCGAAGGCCCACCTTCCCTCTATGATCTGGGCGCAAAGCAGATCTCTTTCGTTGCCATCGAAGGGTGGGCTGCCGCTGAGCATGATGTACAAGACCACCCCGAGGCTCCACATGTCCGCTGGCTTCCCATATCCACCTCGCCCGTCAACATCAATTGAAGCTGCTGCCGTTGGCCCTGGGTCCCCCAACGGCATTGGTCTCTGGCCGAAGAAGCCAAGGGGCCGAGGACGCAAGCGCACGACCTCGGGAGCCGTGTAGGTCAGTGAG…
Lp_Unigene47869_All	MN125883	GACCTCTCTGGCGAGGGCTCGCCCCGGAGGCCGCGCAGCGCGTCGCGCAGCCGCGCGGAGCGCACGAGGGCCACGTCGCCCGCGTCCGCGGGCACCATGAACTCCGTGATCCGGGGCTGCCGCAGGCCGTCGGTGTACCTCCGCAGGGCCGGGTCCAGGCGCTCGCGCGCCTTCTCCTCCGGGTGCCCGGAGGCGGCCACGAGCCGCGCCAGCACGGCCTCGCTGTCCACGGGCGCCCACGCGAAGGGCTCAAGGCTCCTGTCCACGACGGGCGCCACGAAGGCGGCGTGCACCTGCGGGCTCGGGAAGTCCTCCGGGAAGGACCACTGCGTCCTGAAGTTCCGGTGGCTCCGCTTGAACTCGGCCACGCTGCGCCTGTCGTCCGGCTGGACGCCTGCA…
Lp_Unigene48112_All	MN125884	AGCAGCAGCAGCAGGAACAACAAAACAAATAAACGGCTCGAGCCTGGGCCCAGGGACCGCCGCAGGCCTCCGTCACCGCCTATGCGGCCGCCTGCCGCGCCTGCGCCAAAAGCGACGCCAAGGGCTGCGGCGGCCGCGGCGCCTTCCGCGCGGCGCCCGTGTCGATGAGGTGCCGCATCGTGGGCCGGCCGTGCGGGCAGTTCCACGGCTGCTGGAGCGAGCTGAGGTTTGCGAGGATCTTCTCCATCTCCGCCACGCGCAGAGCCTTGCCGATCATGACCGCGCCGCGGCACGCGCGGCACGCGAGGAGCTGCCAGACCTTGGGCGGCCTCGGCAGCGCCGTGGAGCTCCAGAGCGCGCGGTGGCCGGAGAGGTCGAGGAGCCCGCCTCTGGCAGAGG…
Lp_Unigene48147_All	MN125885	CTGCCCTGCTGTGACACCCTGCCAGGCTGGCCCGGCCTGCCCAAGCGCGCCGGGCCCCGGCGCCCCGGGTCATGCGTCCGGGGCCGGCTCCGCTGGCTCCTCGACGAGGGCGTGGACGGCGGCCTCCTTCTGCAGGAAGTCCCGGAGCTGCGAGGCGTTGCCCGGGCCCAAGACGTCGTCCAGCGCCTCCTGCGACATCTCCGCGATGCCGGCGAGGGAGCCCGCGCGCCGCGCGAGCGCGTACATGTTCCTCGGCGTGACGCCGGGCAGCTTCCGCAGCACGTCGAAGGCCGCGGAGTTCGTGTGGGCAGCGCGGCGCAACGGCCTCTCCGCCCCTGCAGCGCCGGGGGCCGGGTCCTCCAGCTCGAAGTCCACCGCGTCGATCTGCGCCGCCGCCTT…
Lp_Unigene48155_All	MN125886	CTCCCGTCTTCTTGTGGCCAGGCCCACGCCCCAGGGCGCCTCCGCCCTGCGGGCAATGGTCGAGGGCCACGGAGTCCACCGCGTCGCCTTCCGACACCGGTCTGCGCTCCTGGGCCGGCGCTTCCGCGCGGCCTCGCCGAACGGCCGCTTCGCGGAGGGCGCTGCCGCCATCGACGGCCGCGTTCTGACGCGCGTGGAGGCCCATGGCAAGAACCTGTTCTATTTCTGGTCGATCGCCGGCTCTAAGCTTGAGGATGATGTTGTGGTCGTGCGCGTGCACTTCGGCATGAGCGGCAGGTTCACAGTGGCGCCACGCGAGGCCATGCCTCCGAACACGCCGAAGACGCGGTTGCTGCTGACGGAATGCCTGCCCTCGCTGGAGGCTCCCTCCGAGGATGC…
Lp_Unigene48320_All	MN125887	CGGGGCTCGACATGGAGCAGCCTGGCCCGTTCCCCCAAGCCGGCAGTTCAACCCTCACGGGCCTCCCCTGGTCCCCGTTCCCCCAAGCCCACGCGCCTCGCTCCCCAACCCCCGGGAGGCACCTCAGGACGGGGCCGCATGCTGCCGGCCCCCGCGGCCAAAGAAGGAGGCCAGGCCCGGCTGGGCCACCCAGGGCGTGCACCGCCTCGTCTCCTGCTCGCTCAGGCTGGGAGCATGAACGAAGAGGCCCTCCTCGCACTCGAAGAGTGCGCACGCAGGCACGTGGTCGGAGTAGCTGGGGGGCGTGTAGAGCATGCCCGTGTGCGGGGCCGCAAACTGCGAGTTGTTGAGGAGCATGTTGTCGGCTTGCAGGCTCAGGCCGGCCTCCCCGGCACACAG…
Lp_Unigene48358_All	MN125888	CCTGGGGTTCGATGCACCTGTGGCCTTGCTGCTTTGGTGGCCCAGCCACCCACCCGTTGCCAGTGTTAAGGCGCCGTGCCCAGCGGTGTCTGCGCGGAATCTTCGGGGCCGCCGCTTTGGCCGCGGTGTGTCTGACCAGCGCCCCGGCGGCATTCCCAGTCACCGCCGTCGGTATGCCTCCGAAGAGGCCGCCCACGGATGCAGCCGTAGTGTGGTTCCGGAAGTGTTTGCGGCTCCACGACAATGCGGCTTTGGTCGAGGCCGTTGAGGTGGCGCCACAACACGTCTGCCCCGTCTTTGTGATCGACCCGCACTTCGCCCCGGGTAGTGTTGGCGTGAACCGCTTTGCTTTTCTGCTGGAAAGCCTTCGCGATCTCGACTGTCAGCTCCGCAAGAGAT…
Lp_Unigene48571_All	MN125889	GCAGCCGCGGCCAGAGGCCGCGCATGGTGGTGCCAACGGCGCCACCGCTGAGGCCGGCATCGTGCGCCGTGCAATGGTCCGCCACGCCCAGCTCGTCCTGGACATGACGGACTCCGCGCGGCAGCCGGACTACAGGCCGCGGCGCTTCGAGTTTGCGGTGGAAGCAGCGGGCCGCTTCGCCGAGCGCTTCCTGGCCGAGAACCCGCTGGCGGAGCTGGGCCTCTGCGTGCTCCGCGGCGGCACCAGCGAGGTGGCCGCGCCGCTCGTGAGCAGCAGCAAGGACTTCGAGGAGCACCTGCTGCGGGCGGCCGCCGGCGGGCCGCGGGGCCGCGCGTCCCTCGTGAGCGGCCTCCTCAGGGCCACGGCCGGCCTCGAGGACACGCCGGGCTACGGCACGCG…
Lp_Unigene50304_All	MN125890	GGGGGCCCGGGGCGATGAAGATACTCGTGAGGCCCCTCAAGGGCGAGCCCTTCGGGCTCGAGACGGCGCCCTGGGAGAAGGTGCGGAACCTGAAGAAGAAGGTCGCGTCGCTGAGGCCCGAGTTCGCCGTGGAGCAGATGATGCTCGTCCACGCAGGCAAGCTCCTGGAGGACGACTCCACGGTGCAGGAGGGCGGCCTGAAGGACGGGGACTTCGTGGTGGTCACCATCGCCAAGTCCAGGGCAGCGAAGCCCGCGGCCGCGACTTCAGCCCCGGCAGCATCCCCTGCAGCGCCCGCGGCGTCGGCAGCTGCTCCGGCCGCCGGTGCGCCAGCCCCTTCGGCGGCGCCCGCGGCCGCGCCCG
Lp_Unigene50884_All	MN125891	CGGCGGAGGCGCCGCCCGCGGCCGCCGGGCCGCTCGCGGCCGCGCCCCTGGCGCGCTGCCGGCCCTCGGGCGCCGCGCGGCTCGTGCTGCTGCTGGACCACCGGGAGGTGGGCGCCGGGCGCGAGCACGCGGCGCGGGGCGCCCTCGTCGCGGACCTCGCCTCGAAGCTCGGTGCGGACGCCGTGGAGGGCAGGTCGTTGCCGCTCGGCGACGTCACGTGGGTCTGGCGCGAGGACAGCCCTGGGGGCGCGGCCGACGCGCCCGCGCGCGAGTTCGTGGCCGGCTGGGTCATCGAGCGCAAGACCTTCCACGACCTCAGCTCCTCCATCATGGACGGCCGCTACGAGGAGCAGAAGTGCCGGCTGCTGGAGGCGCCGGGCCTGGACGGCGTGGTGTACC…
Lp_Unigene51086_All	MN125892	GGCACGAGAAGGGACCAGGGGGGCAAGCGATAGCGCAAGAGGCCTGCAGTTGCCATGGCCAGCGCTCCTGCTTGGAAGCGGCCCAGGGCTGAGGGCCCGGTCGTCTGGTGGCTCCGCAACGACTTGCGGCTCGAGGACAACCCAGTCGCGCGCTTGGCCGCGGGGGAGGCATTGGTGGACGGCCGCGCTGGCGCCGCCATCTTCATATTCGACCCGCGCTTTCTCGACCGCTCACCCTACGGCCGTGTCACGGACCCTGGCTTCGCCAAGTCCATCAAGACGCGCAGGCCCGTGACCTTCGGCAACCGGAAGTGCTGCGCGCTCCGCGCGCGCTTCATGCTGCAGTGCGTGCGTGCCGTGGCCGCCGAGCTGGCAAGCCGTGGCGTGAAGCTCCATGTG…
Lp_Unigene51516_All	MN125893	TCCCGGCGGACGGCACGCACTGTCCCCATCACGGTCGTGCCGCCTCATCCCCCTAAGAATCGCATGTCGCGGCGCTCAATCTTCGAGCATCCCTGGTCGTCCTTGTGGATGTGATAGTACCAATCGGCAACCTGCAACTGGCAGAGGTGGTCCACAAAGGCCTCGTCGTGGGTGATAAGTATGAGCTGAAAGCGCGAATGCTGCCTCCTTGCCTCGATGAGCCCTGACAATGCCTCCGCCAGGCCGCGAATGTTGGCGCCGTCTAGATTCGTTGTCGGCTCATCGAGCGCCAAGACACCGCAATTGACGCAGAAAGAGTCAGCGAGTGCTAGCCGAATGATCAGGGAGCAGAGAACTCGCTGCCCCGCGCTACAACGGCCGCGCATGTCCATCTCTGCA…
Lp_Unigene51570_All	MN125894	GGCGGGGTCACGCACTGTCAACTCCCCCCCAAGCTTCCAAGCTGATGCCGCCGCTAGGCCTTTGGTCAAGCCAAAGGCTGGGTCCAACATACAGCTGCTTGCAAACGCTCAAGACGCCAAAGTTCACACGAGGTAGCAACTTTGCGCCTAGGAACCACAAGCTACCTCATGCGACTCAGCGGAGCGTGCATAAAACATTGCAGTCATTTGCCTTGCACTGCACCAAGCCTCTGAAGGAGAAACGCATGGGCGTCCAGGTCGGACTCGAGAGCCCAGGACACTGGAGCTCGCGGAGAAAGGAGTAGTTAGGGCGTGCAACAAGCGCAAGGGCCTTCACTTGCAGGCTCGCACGCACGTCGCCCGGCCGCGGTGGCTAGGCCGCGTCGGCCGTCTCCTTAG…
Lp_Unigene51894_All	MN125895	GTTGGCCCGAGGACATGTAGGCATCGGGAGACGGGGCGCGGCAGGCTGAGGCAGGCCGGGGGAGGCTGGGCGGGGCCTTCAGACCACACCCGAGTGAGTCATGGGGTTCACCTTCTACATAGAGGACCTCCGGGTTTTCTTTCCATACGACAGCATCTACCCCGAGCAGTACCGCTACATGTGCGAGCTGAAGCGGGCCTTGGATGCCAAGGGCAATTGTGTCCTGGAAATGCCCACTGGCACGGGTAAGACCGTCTCCCTCTTCTCGCTCATCACATCGTACCAGTTGTTGCACCCCCAGGTGGGGAGGCTGATCTATTGCACACGCACCGTTCCGGAGATGAGCAAGGCCCTGGAGGAGCTCAAGACCGTGATCAGCTTCAGAATGGAGACCCTCTC…
Lp_Unigene52978_All	MN125896	GCAAGGCCACGTCTCCGTAGGGGATGCCGCCGTGCCTGTGCAACTGGAAGATGAGGAACATCTCGAGCGTCCATTCACCGATCCCTGGGAGCAGCGTCAAGCGCTTGCGCAGCTCGTCATCTGAAGAGCTCTCAAAGATGTCCTCGTTCAAGGTGCCGTCGAGGAAGCGCTGCGCTGTCTGCTGGATGTAGCCGATCTTCCTGAATGACAATTTCGCAACCTCGCGGATCTTGTCAGCCTGTGCCGCCGAGACCCGCACGGGGTCCAGCAGCTTACTCTCACGGTCACCGCAGAGGCCCAAGAGCCTCTCGAACATGGCCTGGCAGACGCGCATACTAAGCTGCTGGTGGCAGATTGTCTGCACGAGCGTGGTGAAGGGGTCTGGAGGCTTCTTCTCCA…
Lp_Unigene53944_All	MN125897	GCCGAGCGCCCATGCCGGGCAGCCAACCTGCGGGCGGCGGGCCGGGGCTGCCTGGCTGCGCAGGCCCGGCGAGGCTGACTCTCTGCCACTGCGGCTGCCCCTGCGCGCGATTCACGGTGCGGAAGGCCGGCCCGAACCAGGGCCGGGCGTTCCTCAAATGCCCCAGCCCACCGGGCCAGACCTGCGGCTTCTTCCAGTGGGCAGAGGACCCAAGCCCG
Lp_Unigene54547_All	MN125898	CTTCCCGCTCCGCGCCACAGCGCTCCAGGTGCTCCCGCAGCAGCCGCTGCAGCGCCGGCGTGGCGTGGCCCGCGGCCTCCGCGTCGCGCGCCAGCTGGGCGAGGTGCGGTCCGAACTCGGCCGGCTGCTCCCGCGCCCGCCGGGTGCAGTGCTGGAAGAGCAGCTCGAGCCCGCTGCGGGGGCCCGCCCTGCAGCCCCCGGCGGCGGCGAGCCCGGCGGCGAGGAGGACGCCAACAGCGAGCTCTCGATGGAGTGCCTGCTCGACGAGGCCACTGCAAAGTACTGCCTCTGCTGCTCGCTCGCGCTGCCCACCGTCATCGGCTACATCCGGGTCATCCTCTCCGACGTGCACCCCGGGGACGTGTGGCGCGCGCTCGTCACCAGCGAGGAGCGGCTACT…
Lp_Unigene54635_All	MN125899	GTCTGTCTGGCGGTGGTCACGGGGCGGCTCCAAATCGCTGGCCCGTCGGCAGCGAGCAGCGGCCAGTCAGGGCCCATCTGCGGACTCGTCGACCCAGGCCGCGATGCGCTCCTGGGCGTACTGGAGGAAGTAGCAGGCTGCGACCCCCGGCACCACCACGTAGGCCACGACGAAGAGCGGCCAGATCGGCACGCCGCGGCGCGCCAGCCGCGCCACGCAGTCCGCGGCGTCCACAGCAGGCGCGCGCTGCAGCGCGCCGGCGATGGCGGCGCAGTGCAAAGCGCCGCAGACCAACACGGCCTCGGCGTTGGGGATGGCGGAGGTGCGCACCTGGTGCGCCATGTAGCTGCAGCGCTCGTTGACCAGGACCTCGTGCGCTGCGGGGCAGCAGCCCTCGAG…
Lp_Unigene54655_All	MN125900	GCCACCGAATGCTGCGTGACTGCTCGATGCTCCAGGCCTGGCAGAGGGCTATCATGAGGGTCTGGTTGGTATTGGCACGTGGCTGTAAGTTGCCATTACTCTTAAAATACAACCAGACAAGCAGAAGAGCGCCCAAACTAAGGCTGCCATCACCCCACACTACCGTCGCTCCGCTGAGGAATCATGCGAACGCCGCTGCGCTTGCACGAAGCCCTTACGCAGGTGCCGTCTCGGCCTCAAGCAGGCAAGGCGTGCGAGAGGCCAAGGTCTGTTGATGGTACTCCACGAACCAACCAAGATATATGTCCGTGGGCTGCACCAGTACGCCCCGTACAAAGAGCTCGTGCGCGTCGTACGCGTACCGCCCGACGCCATGCAGGCGACGGAGCCGGCTCAGCG…
Lp_Unigene54913_All	MN125901	AAGTGTACAAAAAGTGAAAAACCTAAAAATATTTGGGCACAAGACATGGCTGCGCGATTCTTGTCAAGCACCAACCGCCGCCTCTGCCACGCCACTCCGGTTCCCGCGCACAGCCCACCTGGCTCCCCGCTTCCTCTCCCCCTGTATGGGGGTGCGGAGGGCAGCTGCGGCCAGCTCTGCGCCTGGCTCCCGCAGCCCCGAGGTGGCCACCGCGGCGGGCAACGCAAGCGGCGGCAGCGCCCGAGCGTGCGCGCGGTCTGCTCTCTGCAGGGCTACCGGGCCCTCGCATGAGTGCACAGCGGCTAGTCCCTCCACCATCGGCTCTTCCGCGGTCCAGCCTGCCCAGCAGGCTCCGCAGAAGAAGCGGCCGTCCTCCCCGGCCCAGCCCAGGCTGACATG…
Lp_Unigene55084_All	MN125902	CGCCGCCGCCCGCATGGCGGAGACGTGGGGTGCCGCCCACGTCTTCGTCGTGGACAGCGACGACGAGGAGGCGGCGGCTGCCAGGGCCACAGGCGCTGGCGAGGCCCCTGTGGGAGGCGCGGAAGCGCCATGCCGAGCGCCAGAGCTTGGGGCCCTCTGGGCCGGCCCCCTGGAGGTGGACGACGGCGACAGCGCCGCCTCGGAGGCAGACGCACAGGCCTCCGGGCCGGCGCCCCGCTGTGAGCCCGCGGGGCAGCCGGAGGCCTGCGAGGAGGAGTGCTGCGCCAGAGCTGCCGCGCCCTGCAGCCCTTGCGCGAGCCCGGCCACACCTGGCAGCGGCGCGCCGGCGCAGGGCGCCGCGCCCGCGGAGGAGGCCGGCGAGCGCCTCCGGCGGCTGCA…
Lp_Unigene55814_All	MN125903	CTACGTGGAGCACCAGCTGAAGCAGCCGCTCTTGCGGATCTTCGAGCCGGTGCTCGGCGGCGAAGGTGAGGCCTCTGTGGAGCAGCGCCTCTTCGTGGGGGAGCACGCACGCCGCATCACGCAGGGCGCGCGTGGGTCCAGCGGGCCCTTGGCGGCATTCGTGCGCGCACGCGCCAAATGCTTGGGCTGCCGCGCCCTGCTCGAGTCCGACGGGGTGCTTTGCCCGAGTTGCGGGGCTGCGGGGCGTGCAGGGGACGTGCTGCTGGAACGGCTCAGCGCCCTGCGGCCCCTTGAGGCCGAGGTGACAGAGCTCCTCTCCCAGTGCATGCGCTGTGAAGGCCCTGGCTCTTGCCGCCTGTACGCTGCTTGCGCTAATGTGGACTGCCCCATCTTCTTCCG…
Lp_Unigene55979_All	MN125904	CCGTCGGCGGCCTCCAGGCCCCCTAGGGGCCAGCGGGCAGGCCCGCAGGACGCGCCGGACGCGCCGGGCGCTGCGCCCGGGACGCCCGGGAGGAAGCGCAAGGCCGGCCGCGGGGAGCAGGGCACGCCGCCGAAGCGGCACCGGGCGGCCCCGAGGCCAGCTGACGGCCGCTTGGAGCGCTACGTCCCAGCGCCCAGCAAGAAGGTCGCTGAGCGCATCGACCGCGCGATGGAGCACAGGCTGCTGCTCATCCGCGCCGAAGTGGGCGACCACGGCGCCGTGGTCGCCCACTTCGGCGCGGATGAGCAGCAGCCTGTGCTCCATCGCGCGGTCGATGCGCTCAGCGACCTTCTTGCTGGGCGCTGGGACGTAGCGCTCCAAGCGGCCGTCAGCTGGCCT…
Lp_Unigene56329_All	MN125905	GGCTCGAGCCTGCTTGTGGGCCCTACCCCACGAGGCAGCCTGGGCTAAGGTGGGGCGGGGTAGCGGTGGGCAGCACTGATGTCGCCGTAGGCATGTCGCAGTGGAACTACTTTGTCACCGCCCAGCGGCCGACTGCCGTGAGGCACGCGCTCGGCCCCCTCTGCTTCACATCCTCCGCAGCCTCGGACCTGGTGGTGGCCTGGGCCACACGCCTGGAGGTCTTCCGCCTGCAGCAGCAAGGCGGCCACCTGGAGCGCGTGTGCGAGGTGCCGGTGAACGGTCGCGTGGCGGCGCTGCAGGCGGTGCGGCCAGCCCAGGCCGCGCGAGTCCTGCTGCTGCTCTTCACAGAAAAGCGGCAGCTCGTGGTCCTCCGTTATGTCGCAGGCAGCGCGGACGGCA…
Lp_Unigene56381_All	MN125906	CGCGGGGAGGGCATGGCCGCGCCCTGCGCGGAGGTGAAATTCCTACACTTCCCGGCCAGCGATGCTCCGGTCTTCTGTGTTGATGGTTTCCAGTTCGCGGACGCCAGCGTCACGGAGCACTATTTTCTCTCGCACTTCCATTCGGACCACACCGTGGGGCTGTCGAAGGGTTTTGCCGAGGGCCTCATCTACTGCTCCCCAATAACCGCGCGCCTCGTGAAGGAGTTCATACAGGTGGATTCAGACCGCATCCGCACACTTCCGCTCGACGAGCCGACTGAGGTGGCCGGCGTGCGCGTGACGCTTGTCGACGCCAACCACTGCCCCGGGGCTGTGGTCTTCTTGTTCCACCACCTGGCCACTGGGCACACGGCGGTGCACACGGGCGACGTCCGCGCT…
Lp_Unigene58611_All	MN125907	CGAATTTCAATTGCAACAGGCTGCAGCGCCCCGCGCCGCGGCATTACGGCGCGCGCCCACGGTGCTGCTGGCGGCGAGCCGCACGGCACCCCCCAGCCGTTGGGCTTGCCAGCAGGCGCTTGGGCTGCAGGGCGTGCTGGCGCGAGGGCACCGTTTCGGGCTGGGTCGGCCCCCCTCCGCAGCGCAGCAGCGGGGGTGGAGCATTGCACCGACCTGGCCGGTAGTGGCTGTTGCACTTCTGGCCAAGAAGCGGCAGGCCAGAGCCATGCCACCGCGGAAGAAGGCGTCCGCGCCGAAGGGCAAGGCTGCTGCAGCAGAGGACCGCAAGGACGACGGCAGCGGGGACGTCTCGGGAGGCGTGGTGGACTGGAGGCGGAGGCGACTACTGACACCAGGGGT…
Lp_Unigene58859_All	MN125908	GTGCCACTCGTGTTTGTGGCCGTTGCCGTGCCCTGCCGCATGGCAGCACTCTGGGCTGAGAGTCACCAGCCAAACTCGGAGTCGGAGTTGGTAGTTGGAAAGAAGAAGGTATCAGAGGTACGGGAGTGGCTGACGTTGGGTGCAGCCACGAGGCGGAGACTTCTCGTGTTGCGTGGACCTGCTGGCTGCGGCAAGGCGGCCGTCCTGCGGGGCGTCTGTGGTGACCTTGGACTGGAGATTGTGGAATGGAGCGCAGCAGCGCGAGGCCGTGGCGCGTGGGGCAAGGGGCGTGCTGGCGGAGTGGCAGGCGACTTCCAAGAGCCGCTCGGCGACGCCTTTTTGCGTTTTGTCGCCCAGACGGACCGTTACCATTGCTTGCAGACTACAGAGCCGGACATC…
Lp_Unigene58890_All	MN125909	GCTTCATACACCGGCCGACGTCAGCGCCTCAGCTGCCCTCGGGCCCGGAGCGGCGCAGGAGCCTCGCGGCCGCCGGCCCGGCCAGGTCCCGGGGCCAGCAGCCGCTGGCGTCCCTGTGGGGCCTCAGGCGCCGCAGCAGCAGCCGCAGCGGCCCGAGCTCCCCGGCGCCCGCGGCCCAGTGCAGCGCGCCCTGGCCCGTGCCCTTCTCGCGGCAGGCCAGGTCCAGCCCCAGGCGCTCCAGGAGGCCCAGGGCCTCCATTGGCTTGGAGACCTCGAAGCACCTCCGCAGGGCCTTGGCGCGGGCAGTCTGCAGCTGCTGGCCCAGGCCCACCATGAGGAGGTTGACGTCCGCCCACTCCGAGTAGGGCAGCCAGGCCTCGAGCTGCTGGCGCGTGCCCT…
Lp_Unigene59067_All	MN125910	TGAGTATCAAGCCTTGCTTGGGGGGGGCGGCCGGCTGCAGGGCGTTGTGAGCGCCTCCCGCACGAGGTCCCGGCAGCGCAAGGAGGCCGCTGGAGGGCGCCGGGGGGGGGGGCGCTTGCGGCTCTTGGCGCTGGCGAGGGGCTCGCTCAATGGCGCCCGCGGCAGAGGGCGAGGCAGCCGCGGCGGGCGCCGTGGAGTGCCGCCTGGAGAGCGCGCACGACCTCGCTGTGCTGCTCGCTGCCTTGCAGCTCCGCGAGAGGGAGCAGAGGGAGCAGCGGGTGCACTGCGAGGCCAGCGGCCGTGGCCTCAAGTTCATGGCGCAGAGCAATGCCAAGGACGTGGCGGTGCTGGGCTGGATGTTCAGCAACGCCTTCAGGGAGTACCGCTACACGGGCGGCC…
Lp_Unigene59149_All	MN125911	GACTGGTTGGTCGGGTGATTGGTCGGCTGCACGCAGCAGCAGCAGCGCACTGAGCTCGTCCCGCAGGCGCCCAGCGCCCCCGGTGCGGGCCGCTCAGGCCCCGAGCACCCTGTCGGGCGCCTTCCCCCAGCGGCGCAGCTTGGTCTGCGCGCCGGCGCTGGGCAGCATCTCCACGTCCGCGTCGGCCTCCGGCTGCCTGCCCCGCACCCGGCCCTGAACCTGCGCCTCGGCCTGGCCGCGGCCGGACGTGGCGCCCGGCCGCCGCGGGCCGAACTTCTCCGGCAGCTCCCTGCCGGGCTGCGCGGCCAGGGCCGCTTTGAACCTTCCAAGGTTCGCCTCCCGCGCTGCCGCGTGGTCCACGACCGGCGCCGGGTAGTCCACGCCGACGATGCAGCCCGC…
Lp_Unigene60142_All	MN125912	AAGAAACAACCTGCTTCGGGGACCCGATTGCCGTGGGACAGCCCCCCGGCTGCCACTGTAGTAACCGCGGCTCCAATTTGGCTCTCGACGGCACCGCTCAGCATATCTGCTTGCAAAGAGCCTCTTGAGAGCCACGAATGCTGGAGTGGGGAGGTGGCGTACTTGGGGGCGGAGCATTTCCAGCGTGGTGTTCCTCGTCTGCACGGCATGGCATCGCAGGTGTCGTTGCGGAGAGCCTCACTCGATCATCGCCTCGAGGTCCATCTCCGAGAGGGTTGCTGCGGCCGGGGGCGCGCTGGCCTTCTGGGGAGAGACGTAGACCTCGTTCGCAAGGAAGGCCCGGGCCTCTTCCGTGGAGACTGTGCTCGTGGCCACCTCTGCATCTGTAACGAGGCCCAG…
Lp_Unigene60556_All	MN125913	GGGCATGTACCCTTCGCTGATCGTGGCGAACAACATCTCCTTCGACACCTGCCTGGGCCACTCCCGCCGCACAGCCACGGGGCCCGAGTGCCGCCTTGGCGTGCTGGAGGCGCCATGGACCATCGGTCCTGAAGCTGCGGCGAAGCTGGCCGACGGCTTCGGCGAGGACAAAGGCGACTGCCCCGTGCGGCTGCTGCCCAGCGGCTGCCTCTTCGCATCGCAAAGCGTGCGGCAGGGGCTCATGCCGTTGATGCTGGCGGAGGTGCTCCGCCTCCGCGCGGAGACCAAGGCGGCCATGAAGAAGGTGGAGCCCGCCGCGGCGGCGCGGCTGGAGCAGCGGCAGTTCGCCCTCAAGTACTTTGCCAACGTGACCTACGGCTATGCGGGCGCCTCGTTCAG…
Lp_Unigene61611_All	MN125914	GGGGACACGGACTCCCTCTTCGTGCGCCTGCCCGGCCGCTCCAAGGAGGAGGCCTTCGAGGAGGGCCGGCGCATCGCGCGCGAGGTCACGCGGAGCAACCCGCGGCCCGTGGAGCTGCAGATCGACAAGGTCTACTGGCCCTGCTGCCTCGTGTCCAAGAAGCGCTACGTGGGCCACGCGTGGCAGGGCCCCGGGGACGCCTCGCCGGTCTTCGACGCCAAGGGCATCGAGACGGTCCGCCGCGACCAGTGCGCGGCCACGCAGCGGCTGCTGCGCGGGGCGCTCGAGGCGCTCTTCCGCTCGGGCGGGGACCTCTCGCCCGCGAAGCGCTACCTGCAGCAGCACGCCGCCCGCATGCGCGCG
Lp_Unigene62480_All	MN125915	GGAATGCCAAGCAGGGTCATCGCGCACCTGGATCTTGATTGTTTCTATGCTCAAGTGGAGCAGCGTCGCCTGGGACTTGGCTCCCCTCCATGGACATCCACTGAGTCACCCCCAGTTGCAGTGCAGCAGTGGGACAGTCTCATCGCTGTCAACTATGCAGCACGTCCCGCAGGTGTCAAGCGTGGAATGCGTGCCACGGAGGCAGTGGGATTGTGTCCAGGACTGCAGCTTGTGCATGTTGAGACGCTGGGTGAGGGTGCGGCGGAAGGAGATCACGATCGACGCAAACAGAAGGCGTGCCTCCGACGGTACCGTCAGGCCTCTGAGGAGGTTATGGCGATCACGTCCACGCATGGGGCTAGATGCGAGGTTGCCTCGATCGACGAGGCGTACTTGGAT…
Lp_Unigene62514_All	MN125916	CCCTCCCCCGGCCTCGGGCCATGTCCGCAGCGCGGCTCGCCGCCATCCGCGCGCGCGTCCAGGCCAAGGAGAAGGCCGAGAGGGAGCAAGTGAGCGCGAAGATCGCCGCCCAGTCTCAGGAGTGGGAGGAGCGCGAGGCCCGCGAGCGCGAGGAGCGGAAGGCGGCACTGGCCGCACGCCGGGAGGCCGCAGCCGCAGCCGCGGCCGAGGCCGCCGCGAAGGAGGCCGCCGCGGCGCAGGCGGCGGGCGCCGGCGGCGGCGAGGAGGCGGGCGCCAAGCGTCGGAAGGTCGAGGAGGCCAATCCGAAGTGCGGTTGCGGCGTGGAGGCAGTGAGCTTCAACGTGGTGAAGGAGGGGCCTAACCTAGGCCGGGCCTACTTCACCTGCAAGAAGGGCCGCA…
Lp_Unigene62602_All	MN125917	TCAGGCAGCGAGAGCAGCCCTGCGAGAGGCTCTGCCAGGTCGTGGCTGCGGAGGCGGCGAAGGGCAGGGAGCCGCAGGAGGCACTGCACTACCACCTCATCCTCGCAAAGGTCGCGAGGGCCGGCTGGGAGAGGGGCGAACTGCCCCAGGCTGTAGCGTGGGAGGCCCTCGGCACCGCCCACCGCTTGGCCGAGGCGTGTGGGGCTCCCGAAAGGGTCCTCGCCTGTGCAAGGCTTGCAGAGTTTGCCGACGCGGTGCTACGGAGGGCCGAGCAAGCCGGCGAGGCGTCGGCGGTGCAGCGTGAGCTGCCGGAGTCGCTCGTGCGGTGCGTGTTGCAGATACTGGAGCTGGGCGATGCTGCTGCTGGGGCGCAGGATGACGCCTTCCGCCGCGCGCACG…
Lp_Unigene63025_All	MN125918	CCCGGCCGGCCCTCTGGCGGCCGCCATGCGCCCGGGCGCCGCAGAGGCGCCCCGGCCCTGCGCGGCGGCGCCATGCTGCCCTACCAGGAGCGGGCGGTGGAGGGCCTCCTGCGCTCCGACGCCTGCCTCGCGGTGCTGGGCCGGGGCCTGGGCGCGGAGGCGGTGCTGCTGGAGCTCGCCCGCAGGAGCCTCGAGGCCGGCTCCGACACGCAGCACGCCACGCGCCTCGTGCTGCTCCTCAACACGCCGCAGGAGGAGGCGGAGCTGCTCGTCCGGAACGCGGAGGAGGCCCCATGCTGGGTTGGGAGCCGCTCGAGGTTCGTCGCCGTGGGCTCCGAGATGGGCGTGGAGGACCGCGCCCAGGCCTTCGTGAAGGGCGGCGTGTTCGCCGTGAGCGCA…
Lp_Unigene63036_All	MN125919	CCGCCAGAACCCCCCGGCCGCGCGCGAGGCCCGACCCCCCCCTCCCCCGCGGCCGGCCATGGCCGCCTCGCCGGGGGCGGGCAAGCGCCGGCGCCTGCTGCTGCCGCCGGGCGGCCGGGAGCAGGGCCCAGGCCACCACCACCTGCTGTCCACGTCGGTGGACAGCGCCAACCCCTGGAGCAGCCACGACGGCGCCGGGCCGGCCCAGGCCGAGCAGCGCATGCACGGGGAGGCGCCAGCGGAGCAGGAGGTCCCCGGCTCCCCACAGGGGGTGCCTGGGCCCTCGGACTTCCAGGTGCTCTTCGCCGCGTGCGTGGGGCGCGGCGGCCGCCTCGGCCTCGCCTACGTGGACCTGGACGCTCCCGAGCGGGTGCTGCACGTCACGGACCTGCTGGACCC…
Lp_Unigene63133_All	MN125920	GCTCGAGTCCGGCTGCTGTAGGGGCCGCGCGCCGGACCGAGTTGCGGTATGGCAGACTTCGACCCTACTGACTACGACGGTGGTGGTGCCGGGGATCCACTCCTCAGCGGCCTCGACGGGGAAGGCCTAGAGGAGGAAGAGGACGGCGGCACCCCAGCGGAGCAGAAAGAGCTGCGGGATGCCATCCTTTTCGTTGTGGATTGTGCCTTCGCAGGAGCTCTCACACCCCTGCAGCCAGGAGGACGATCCCTCGTCACAGAGGCATTGTCTGCGGCAGTGCACGTGCTCAAGACAAAGGTGGTCACCTCCCCGGATGACCGCGTGGGCGTGGCTCTCTACGGCGTCCGGGAGAAGCTGAACCCCAACAGTTTCGAGGGCATCCGCGTGATCCAGGAGCTG…
Lp_Unigene63301_All	MN125921	GCGGCCCGCCGCCGTCCGCTGCTCGGGGAGCGATGGCGCAGCCGGACCGCCTGGTCGTGGTGTGGTTCCGCGCGGACCTGCGCTTGGACGACAACCCGGTCTTGCATGAGGCGCAGCGCCTGGTGCAGCAGGGCCTGGCGTCCGCCGTGCTGCCGGTCTACGTCCTGGACCCCCGGGCCTTCGGCCGCACGCGCTGGGGCTCCCTGAAGACGGGGCCCTTCCGGGCCCAGTTCCTGCTGGAGTGCCTGCGGGACCTGCAGGTCAGGCTCCGCAGGCTCGCGGCCTCGGAGCTCCTCGTGCGCGCCGGCCGGCCCGAGGAGGAGCTGCCGCGGCTCCTGCGGGGCCAGGCGGCGGCAGGGGGCGCGCTGGTCCTGGCGGAGGAGCAGGCGGCGGACGAGG…
Lp_Unigene63346_All	MN125922	GTCGTCGCAGAGAACCATGCGCAGCTCCGCGGCCGCCGCGCGCCGGCCCTCGGCCCCGCGGGGCCGCCGGCCGCCGCCGCCAGGCGCTGCTGCCTCAGGCCCTCGGCGCGGTCCTGGATCTGGTTCCGGATCTCATCCTGGCCCGCCGCCCGGCTCTCGCGCATCACCGCCTGGTTCGTGGCGTCCACGGCCTCCCTGACGAAGCGCTCGATGGCGCAGACCTCCGCGCGGTGCACGAAGGACTGCACCGCGTCGTTGAGGTCCGGCTCGGAGAGGATCTGCAGGTTGTGCTCGCCCTCGATGTACTTGTAGATGATGTCCTGGATCTTCACGCCGTCCTCCGGCACGAAGGCGCCCTCCTCGATCTCCAGGACCTCGCCCAGGGGGCCCACCTTCTTG…
Lp_Unigene63655_All	MN125923	CCGCCGGCCGCCAGGGGCCCCCGCGCCGCAGGGGCCTGCGGGCCCGGCCGGGAAGGCGCTGGGGTCCAGGCAGGGCGCCGGGTAGGCGCCGGCTCCACACGCGGCGCGCTCGGCCAGAGCCAGGCGCCAGGGCTCGTGCGCGTGCTCCGGCGCCAGGCCGCGCAGCTCCGGCAGCCACTGCCGGATGTAGGCGGCCTCCGGGTCGTAGAGCCTGGACTGCCGCAGGACGTTGAAGCGGTTCGTGCGGCCCCCGTGGAGTCCGGCGGCGAAGAGCCAGTTGCACCAGTTGGAGGCCACGTCGTAGTCCACCAGGTGGCTCTCGAACCAATCGGCGCCGCGGCGCCAGTCCACGTCCAGGGCCAGCGCGAGGAAGGAGGCAACGTTCTGCCGGCCGCGGTT…
Lp_Unigene63874_All	MN125924	GGCTCGAGCGGCTTGTGCGCCGGGGGATGACCAACGGCTCCGTGCACGGTCCTTCCTTGCTTGCTGAGTTCCTGGCCAACCTCTCCGAAGAGGATGCTGACAGCCTGTATACGGACTCCGCCCCAGTGCGCTTCGTCTTTCGACAGCTGCTGCCTCCCTTGGCCCAACAGTTCGTCATGCGGCTGCTCTTTGGCGGTGGCAAACCCTTCCAGGAAGTCGTACTGCAGAAGTGGGCTTCGCCGGAGTCTCCAGAGATGCTCGCGGGCGCTCTCGAAGCGCTGCGGCGCTTCCGCGTGCTTGTGGCCTTCGGCGCCGCTGGCGAAGCAGGCGCCGCTGCCAGCCCAGAGCTCCTGGTGCTGAGCGGCCGCTTCCAGGAGAGGCTCGCGGCCCAGCTGCTTG…
Lp_Unigene64350_All	MN125925	GGCGCCGGCTGCCGCCGCACCGGCCGGGCTGCCCCTCGGCCGGCTCGGCCTTCAGCCTGCCGCGGACCTGCAGGGCGCCCGGCGGCCCCGCGGGGGAGGGCGCCGGCTGCTGCTACGCCCCGCGGCTGCTGGAAGGCCGCCTGGTGAGCACCAGCCGCGTGCGGGACCGGGAGGCGCTGGCGGCCGCCGTGCGCTCCCTCGGCGGCGAGTGCACGGAGGAGCTCACGCGGGCGCACACGCACCTCATCGCGGGCGCGGCGGAGGGCCTGAAGTTCGAGTACGCGCAGGCCCACAGGATCCCAGTGGTCTCCCGCGCGTGGCTGGAGCAGACCCTGAGGCACGGGACCCCGATGCAGGAGCGCTTCTTCGCCGTGGCCTGCCAGGGCGGGGAGTGAAGGG…
Lp_Unigene66289_All	MN125926	CCGGCTGGAGCGCGGGATGCAGGCGGCCGCAGCGCACGCGGGGCCCTGCGGGGGCGGGCGGTGATGGCGCAGCCTGCCGCGCAGCCGGAGGAGCCGAAGGAGGCGGAGCCGCGGGCGGAGCCGCCGGCGGGGCGGCAGGAGGCGCTGGACGTGCGCGTGCTGCGGTCCATCCCGACGCCGGTCGCGGACGCCCTGCTCGCACAGGGCTGCCGCAGCGCCGGGGACGTGCTCGCGCGGCCGGGGGCGCTGCAGGAGGCCCTGCGGCAGCTCCACGTCGCCGGCGCCGAGCAGAGGGCCGAGGCGGCCCTGGCGGCCTGCCGCCGCGAGGTCTCGGGCGCCTGGGCCTCGGCGGACTCGGCGCTGGAGCTGCTGCAGCGCGCGCAGGCGCGGCCGCCCCTG…
Lp_Unigene66408_All	MN125927	CACATGGCAATCATTTGCGGTGCCCCTCTTTGCATTAGGCCTGTGGCATGGCTACAACCGCAGTCATCCCAGCCCAACACTGAAGATATTTTGAAACTGGGGTGCCACGGCATCACCTGCGAGCCGTTTCTACAGGGCACCTCTGAACTACGCTGCTCGGGAGTCTCACACCTAAGACTCTCGAACAGCTTTGGCTTCCCACTCGGAAGGGAGTGGGAAGGGACAGGGATTCCCATTTGACGCCCGCAGCCCCTGCAGCTGACCGGGCGATCTAGAAGCAAGGCTACGCGGCTGATGCTATGACACTAGTGGCAGCGACCAAGTCAGAGAAGAAGAAGTGCCGTGCCTTCTTCAGGCAGACCTCGGGAGTCTGCCCGCCACCACTCATCTGTCGAGCGG…
Lp_Unigene67177_All	MN125928	GAAGAGAGAGACGCGGGCACATAATCCGCGTGTGACTGTACACGTGCTTGCTGCCCAGTTCTCGTACCGGAATGCCGGTGACAAACAATAGCTAGGCATTTAAGCGAGCATAACGGAACGCGTTGTGCTGCCTGTCATGGTCCTCAGTGTGGTTGGCGTGCTCCAGAGTCTGCGCTTGCCCTTTGTTAGCTGCAAAGTGCAACCAAGGGAGCATCAACACAGCTTCAGCCCAGCCACAAAATCCAACAACGCCAAGCATCAACTCCACACTTGCATCTTGGCTGGATGGACGTCAATGTCATGGCAGGCTGCGGCAGATTCACAATGCACTCACGCAGCAGCATGGCCAGCCGGCCAGGTGCCTTCAATGAACCCAAGCACGCACACCATGAGAGCATC…
Lp_Unigene67503_All	MN125929	GGCGCAGACACCAGCATGGCGGAAGCCTATCTGCCGCCGCCCGGGCGCCGGCGGTCCACGGCGCCGCGGCCCTGCTGGGGTGGCCCGCCGCGCCGTGGCCGCTGCGCTGCCGGCTACAGGGGCTTGTAACCCTTCTCCTTAAACATCTCCTTCTCGGTGTAAAACTTCACGCCAACTGCCTCGGCAAACTTCATGTCGCTGTCAGAGTGGTCCTTAGGCCGCCCCGCAGCATCCCCGCAGAAAAAGGACTTGGCCCGGTCCACCCTGGTTCCCCCGTTCTTGAAGCGCTCTAGGAACTCCCACATGCCGGAGCCCGGCTTCCTGTAGGGATCTGCAGCCTTCGACGGGGCCGTGGCCACAAAGATCTGGCAAGGCAGGCCTACCTTCTTGGCCAGGCCG…
Lp_Unigene67913_All	MN125930	AGAGCATGTTGGCTGCTTTCCTTCTGCGGCATGCCAACACGCGGTCGGGGTGCCATGGCTTGGTCCGACTGGTGAGAGCAGGCGCGTGAGCTGTCTGAGGCCCAGGCGAGGGCGATGCCGCCGCTGGTTCCGGGCGCACGTGCGTTGCAGAGGAGCCGCGCTGGTCTGGAGATGCTTGCGGCCATACGGCTCCCAGCTCCATGGTTGCGTGAGGGCTGGTGCCTCTACCGGTGCCCAGTGAGCGTGCGGCCCTCTGCGCGCGTCGCGGCCTTCGATTTCGACAAGACACTGCATTTTGGCGGCGCTGCTTGGCGGCTCTCATCTGTGCACGTGACAGCACGGCTGCGGCAGTTGTACGATGCGGGCTACAATGTGGCGATTTTCTCCAACCAGCACGCG…
Lp_Unigene68135_All	MN125931	GCCATGCCCGGCGGCGGCGCCGGCGCGGACGCGGCGCGCGCGGAGGTGGCGGCCTCCGCGGACGCCACGCCCTTCCAGAAGCGCGTCTACGCCCTCTGCACGTCGGTCCCGGCGGGCTACGTGACGACCTACAAGTCGCTGGCTGCGGCGCTGGAGCCGCCGTCCTGCGCGCGCGCCGTCGGCCAGGCCATGCGGAAGAACCCCTTCGCCCCGCGGGTGCCGTGCCACCGCGTCGTGGCCTCCAGCCTGGAGCTCGGCGGCTTCTTCGGCTCCTGGGGCGCCGACTCGCCGGAGGTGCAGCGCAAGCGGCGGTTGCTCGCCGAGGAGGGCGTGGCCTTCGAGGAGGGCGAAGGCCCGCGCGGGCCTGTGGTGCGGCGCTCCTGCCTCCTGGACCTCGCC…
Lp_Unigene70169_All	MN125932	GTCGAGCCGCTCGCGGCGGAAGCAGCCCTCCGGAGCAGGGCCGCTCACGGCGACGCGTCGGCCTCCGCCAGGTCCTGGAGGAGGCCCGGCTACGAGCGGACGAAGTCGAGGAGCGCCCTGGTCGCGTCCGCGTCCTCCGGGTCCAGGGCGCGGAGGCGGTCCGCGACGAGGCGGCAGAGGCGCTCCCGGCGCGCCTCGCGCGCGTCCGCCCGGGCCGCGGCCTCCGCGCAGAGGCCCTCCGCCGGCGGCGGCACCGCCTCGCCGCGCTCCAGGGCGCCGAGGATCTCCTCGGCGCGCGCGAGCGTCGCCTCGTCCAGCCCCGCGCGGCGCGCGCACTCGATGCCGAAGCTCTGCTCCGCGGCGCCGGGCGCGAGCTGGTAGAGGTAGGCCACGCCGCCT…
Lp_Unigene70233_All	MN125933	CTGGTGCTCCACGTAGTAGTCGGCGTCGATGGGCAGGCCGTGCTCCATGGCGTAGAGGGGGTCTTCCGCCCGCTCGTAGGCAGGCGTGCCGGCTGCGGAGGCGACAAAGATGTAGGGCACGCGCTCGCCGACCTGCGGCGCGGAGGCCGGGTTGCGCAGCCGCAGCTTCTCAGCGAGCTCCACATGCGCCTGCTTCGCAACGTAGGCCTCTGCGCCCTCGCGCACTAGCGCCTTGGAGATCACCAGGAGCCGCGGGTCTACGCGGCCCTGGCGCAGCGAGGCCACTGTCTCCTGCACGTACGCGATGGCCTGCTCTGTGGAGCGCTCCCGCAACAACAGGTGGAGGCACCGGTCCACAACCTGCCGAACAAGCTGGCACCAATCGCGGCGGACCACCTC…
Lp_Unigene71190_All	MN125934	CAGCTGACCTCGCCAACGCCCTCGAGATCTCCGGATCTGCCCGTGGCCAGCTCACGACCTGCCACTGCAAACATGCTGATGAGGCAGTCAGCCACGGCCATGCCGAGCCTTCGCCTTGCCATTGGAGTCCTATGGCAACGCTCTCCTGCTGGTCCTGCTCCTGGGCTGCCGCGCCCACGGCGGCGGCCGGAAGTGGCCTGTGCAGCCCAGCCAAGGGGTCTGATGCGTGGCCCTTGCCGAGCCTCCGCGGGGGCCCGCCGTTCTGCCCCTGGCTGCGGTCGTGGCCACTGCGAAGCCTCAGGCCTGGCTGCTGCAGCTGCTGGCCTCCGTCGCGCCCGCATCTTCACCTCCCTGGTGTCCGCGGCGGCTGTGTGGGTACAGTGAAGCAGCGCGCGGCTC…
Lp_Unigene71304_All	MN125935	CGCAGACTTGCCGCGCCGGCAAGCCCGGCTAAGCCATGGCGTGCAGCCTGCCGAGCCGGCCTCGCTTGCCCACCAGCGCTCCGCTGGAGGCGTTGCTCGATGCGGACCCGGCCCTCTGCGACCTGCTGCAGTCGCGGAAGGTCCAGAGCCTGCAGGACCTCGTCTTCCTGCCGCCGTGGGAGCTGCGCGACTGGCTCCTGGTCTCGGAGGACGAGGCCACGGCCGTGCTCTCGCGCGCGTGGGCCGCGTGCGCGCCGCCCATGGCCACGGCCTGGGATGCCCTGGCCGCCCAGGCCCACCCGCGCGTGCCCACGCCGCTGAGGGCGCTGAACGATGTCGTGGGCGGCGGCCTCTCGGGCTCCTTCCTGGAGGTCGCGGGCCCTCCCAGCGCGGGCAAGA…
Lp_Unigene71337_All	MN125936	TGAGCGCTTCAACACCCCCCCAAGCTCGCAGATGGAACCTAGACTAGCAGCCCCTCGTGCATGTCGAGCACTTCTCCGAGCCACGGGAGGTCGTGCGGCACGACCAGTGACCGCAGCACGCGCACAACGAGCAGGAAGTCGCCGGCGGTGAAGCGGCCCGTGAAGCGGCCGTAACACTCGCAGAAGTTCTGCATCTGCGTGGTCTTCAGGCGGCGGCACTTCGTGCAGACGATCTCTTGCGACTGCCAGGCCTGTATCTGGCTCTCGAAGAGGCCCACGAGCCTCGCCTGCACCGCGTCCTTGTCGTAGAGGCGCTCGCAGTTCTGGCAGACCCAGAGGCCCGGGCCGCGGGTGGCGTGCGAGGTCACGTCCACGTGCGAGGCCACACAGCACCAGGGG…
Lp_Unigene71445_All	MN125937	CTCAGCAACGTCTGGAGAACACTCGGCTTCCGGCCTTACCTTGCAATGGCCAATGGGCATCCTTGGGCTCCTGAAGGCGCTTGAGGGCATCCAGCGAGACTGCCACGTCCGCGAGTACGCCGGCCTTCGTGTGGCCGTCGATGCACATTGCTGGCTCCATGCGGGGCTGGCGACGTGTGCGTTGGAGCTGGCCACAGGCGAGGGCAGCCGGGCGCACATCAAGTTCTGCATGAAGCGCGTCGCCATGTTGCGGCGTTGGGGTGTGGAGCCTGTGCTGGTCTTTGACGGCAATGCCTTGCCAGCCAAACGTGCCACAGATGAGGCGAGGTCAATACGCCGTCGGGCGCAAAGCGAGGAGGGCAAGCGCAAGTTTCGCATGGGCGACCTCACGGGCGCGCG…
Lp_Unigene71572_All	MN125938	CGCGTCGCGCGGCGGGCACGCATGCGGCCGGGCCGGGATGACCAGGCCTGGGCAGCCCCGGGCACGCCTGTGGGACGTCCTCCGGCCGCCCAGGGATGGCTTCGTGGAGCTCTGCGGCCTGGCGGGCGCCGGCAAGACGCAGCTGCTCGTGGACGCCTGCTGCCGCACGGCCCTGGCTGCGCGCGCGCCGGTGGTGCTCGTGGACACCGAGGGCAGCTTCGATGCCAGGCGCTTTCGAGAAGTGGCCGCCGCGTCCACGGGCAGCGGCCGCGTCCTCGCGCGGCTGCTGAGGCGCCTGGTCGTCTTCCGGACCTACGACGGCCTGGAGCTGCAGGCCGTCGTCTGCGAGCTCCTGGACGCCCTGCGCGAGCGGCCGGAGCCCCCGCCCTTCAGCGCGGT…
Lp_Unigene71779_All	MN125939	GTCCACCTCAAGCCCAGGCCCAGCCACACACTGCCCCACCACCTAGTTGCGCAGCCAAATCACCACAATGGCTGCTACCTTCGACTCTGTTGCAAGCCCAGCGCGCTCGCGCATGCCCGTTGAGAGCCCGCCGGCCAAGAAGCAGAGGTGCATGCCTTGCTTCCGGCGGTGGGAGCGCCAGCCGGCACCGCTGACATTCTCTGGGCCGCTCCAATTCATGCAGGTCGACATCGACTACTACACGGAGTCCCCGGACCCGCGCTTTGCCGCCCCTAGCTGCAAGCCGGACACCAAGGTGCCCGTGCTGCGCATGTACGGCGTCACAGAGCAAGGCAACAGCGTGATGGCGCACATCCACGGCTTCGAGCCCTACTTCTGGGTGCAGTGCCCCTCGGAGGA…
Lp_Unigene72427_All	MN125940	GGCTCAAGGCGTTGGAAAGATTCCCGACAATCCCGCCGGATTCCGCGGGAAAGGCAGCTGTGCCCGAAGCCGCAGCCGCCATGAAGATTGCAGTGCGGCCTCTCAAGGGCGAGCAATTCGAAGTGGAGATCGAGCCGGAGCTGACTGTCCAGGATCTGAAGAAGAAGATCACCGAGAAGAACGCGGACTTCCCCGCGGAATCGCAGAAGCTCATCCACTCTGGCAAGATCTTGCAGGATGCCCAGAAAGTTTCGGAGACGGGCATCAAGGAAGGAGAATTTGTGGTCGTGATGGTCACCAAAGCGAAGGCACCAGCGGCCGGCGGCAGCGCCGCGGCCCCGGCGCCGGCTGCAACGACACCGGCGCCGGCGGCGCCCGCCGCGGCACCCGGCGCGGGAG…
Lp_Unigene74664_All	MN125941	CAATCCAAGGTCAACCATGTTGAATTCCACAGAGCCATGGCAGGCCTGACAGAGCGAGATGCTGCCTGCAGAAATGCCGGTGGCGCAGCCAGCTCAACGCTCGGGCCGAGGATCCAAGGAAGCCCTCCGCAGTTGGGGGACGAGTGGCAAGTCGAGACGGACAGCGGGTGGAAAGCGCTCGAAGGGCCGGCACTGGATGCCATGCGCGACGCTGAAGCACGCGGCAGCCTCATCGCGGCCTTCGAGCAGCACAGCTCATGCTACCTCCTGGATTTGGAGACGAAGACGTTGTTGAACACTGGCACGGGGCACTGTCGGAGGCTGCGGCGGCCACCCGGCGTCGCCAGCCCGGCACCGCACGCGGCAGCGCAGCGGCTGCCAAACCCAGGGACCACGGAG…
Lp_Unigene74714_All	MN125942	CCGGGCACAACACCTGTAACCACTGGGGCCCCAAGGACAACTCTGGCAACAACGCTGGTGGCGGCCATGCACCTGCGGCATCGACGGCCTCTTGGGTCTCGCTGAGTGGCCAAGCCCGCGGCCCGAGGGCCACTCTGCGGCTCCGCCGACCCGGCCCCAGAGCGCCGGCAGGCCCCCCCTGCCGCGCTCTCCCCCGCCGCGCCGGCCACTCCTGGCCACGGCGCCTGCTCCCGCGGGCCTCAGGCCCTCGCGCGCTTGGGGGCACCCCCAGCGGCCCCTGGCGCCTTGCGCTTGCCACTGCCCGCCTTGGCGGCCGCCTTGGCCGCGCTCCTCTTCTTCGTAGGGTCGAACTTGTCGCCCTCCTTGATCTCGATCTTGGGCGCTCCGAAGAAGCTGTCG…
Lp_Unigene75127_All	MN125943	GCGAAATTCAGAAACTCTAGAGGGTGCGCAGCCTTGCCCACGCGGCCCTGTCCTCGCCTCGCTGAGCCCGCACCGCCGGCGCAGCCCCACCGCGTCAGTGCGCAGCAGGCTCGGTGAAGAAGGGCGCGTGGAAGACGTGGTGGAGCCGCTTGACCTTCGTGTCCCCGATGCCGGGGCACCGCTGCAGCTCCTCGACGGACGCGGAGGCTATGCGCGCGAGCGAGCCGAAGCGCCCCGCGAGCGACGCCGCGTCGGTGCGGTTGACGCCCTTGACCGTGGTGAGCACCTCGGTGAGCCGCGCCTTGTGGTCGCCCTCCGCGAGCTTGCCCATGAGGGCCTCCGCGCTCTTGCTCTGGTACCGGTGCAGCGTCTCGAGGTACGCCGCGGCCTCGGCGTCGC…
Lp_Unigene75437_All	MN125944	TGCCAGTATACTGTCATAGTACCACCGCCGGGGTGTACGAAATGAGCGACCCAAGGCTCTGCGGCAGCAGAGCGTACAACACGAGGGCCCTGTCTTCCAGCACGCACGCGATGTGCGCCTCTGCGGAGACCGTCTGGAAGGCTGCGAGCACCTCCCCCAAACGCCGGAGGGAGAGGATGAGCCGCACCGGCCCCTCCGGCGAGGCGTTCTTCTTCCCCTCCGTCACGAGCGACAGGGACTGGAACGTGGACTCGATGCTCACCAGCTCGGCCTCCGCGCAGAAGCGCAACCAAGCCCGGGCGGCGGAGGAGAGGGCCGCGCCGGCCGCGCCGGGCGCCGGCTGCTTCTCCATGGCAGCCTCGACGGCGACGTGGTGGCAGCCCACCGTTCGCATCTTCT…
Lp_Unigene75562_All	MN125945	CTCCCGTGCAGGCACATCGCAGCGAAGACTTTGTGTCACACAGGGAGTCATCGCTGGGCATCGGAGGCCCTCATGTACTCGTCCAATACGGACTGGTGCGAAGTCCCAGCACGGCAAGGCGCCTGAAAGGCCTGCCGCGAGTCGGCCATGCCGCCCCACCGCCGCCGAACGTCGTCATCGGCACCGCTTCTCCCCTTGCCCCTGGACTTCCCTTTGCCCTTGCCTCCCCTCTCGCTGCTGCGCGGGCCCCTCTCCGGAACCGCCTCATCCCGAGCATTCGCGCGGCCGCCCCCGTGGGCAGTGTCGGCATTGCGGTACTGCGGCGCGGTGAAGACGCGGAACTTCCGGCCGTCATGCGCCAGGGTCGAGCCCCGCGGCAGGACGAGCAAGTCGTAACCC…
Lp_Unigene75735_All	MN125946	GCTGACGACAGATCCACCGAGCCGCCGAGGCGCCCCGCGCGGCCCCCCCGCGCGCCCGCGCGCGCGCGCGCGGCCCGCGCCGGGCCGGCAGGCCCTCAGGCGCAGAGGCCCTCGGGGCCGAGGTCCAGCAGCCGCCGGTCCGCGCAGCGGTCGTGGCGGAAGCGGGTGCCGCAGGCCGGGCAGACGGCGGCCGCGTCGGAGCAGTAGACGGCGAGGCAGCAGGAGCAGACGTGCGCGAGCTCCTTGCGCTCGCCGTGGCAGGCGCAGACCGCCGCGTGGTTCTGGACGTCGGCCGTCACGTTCATGCCCTTGCGCACGGCCACGCCGGGGAGGAAGTGGAAGAGCAGCACGGGCACCAGCACGTCCTCAGGCCGCTGCTCACGGCCAGAAGGCGCCAGC…
Lp_Unigene75744_All	MN125947	CGCACAGTACGCGCCTGCGCACGGTACATGCCAGACAGCAACAACAAGCCACATGACCGACGGCCATCGTAACGACCCGCATGCCCATCGGCAGCCCAGTGGTCAATTGCACCGGACGAGGGCCTGCAACTGATCACGCCGCTCCAGGGAGCGCGCCACGAACTCCTCCTCGTCGCGCGCGGCCAGGACGTACGCCAGGGGCTCCGAGGCGGCCTCGCCGGTCCGCTGCCGCTTCGCCGCCCGGCCAAAGCCACTGCCGGCCTCGAACTCCTCCGCGCGGTGGCGCGCGGCCTCCACGACGTTCGTGGGGAAGCCCGCCAGCTCCGCCACGTGCGCGCCGTAGCTCTGGTCGGCGGCGCCGTCCGCCAGGGAGTAGAGGAAGGTGAGCTGGCCGCTGGC…
Lp_Unigene76685_All	MN125948	GGAGTGCATCCCGCTGGTAATGGAGCCCAAGTCAGGCTTCTACTTCGACCCCGTGCTGGTGCTGGACTTCCAGTCGCTCTACCCCTCCATCGTCATCGCCTACAACATCTGCTTCTCCACGTGCCTCGGGCGCCTGCAGGACGCCCCCGGCGGCGCGCGGCTCGGGGTGCTCGAGGCCTACCGCCGGCCAGAGGGCCTGGACCCGGAGGAGCTGGCCGCGCTGCCCAGTGAGGCTGTGTTCGTGAAGCGGCGGAGGAGCCGTGGCGTGCTCCCCCGGATGCTTTACGAGATCCTGCAGACACGCATCATGGTGAAGCGTGCACTGAAGGAGCTCCAGAAGCAGGGCGGCGGCGGGCCGGCCGCGGAGGCCCGCGCGCGGCTCCTGGACG
Lp_Unigene76716_All	MN125949	TGCCGCTGGAGGTGCTGGACAAGCTGGCGGTGCTGCCGCGCGCCGGCGAGCTCTCGCGGCTCTTCGGCATGGACGTGCTCAGCGGCTTCACGCGGGGCACGCAGCTGCGCGTGGAGTCGTTGCTCATGCGCGTGGCGCGCGCGGCGGGCTTCCTGCTGCTGTCCGCCTCGCACGCCCAGGTGCGCACCCAGCCGGCCTTGGAGTGCCTGCCCCTCGTCATGGAGCCGTCCTCCGGCTTCTACTGGGACCCCGTGC
Lp_Unigene77209_All	MN125950	TGGCGGGCAGGTAGTCGCAGCCGCCGAACACGCAGAGGTCGGGCAGGGCCTCTGGCGTGATGCGGTAGGGCGCTAGCCCCCGGGAGCGCTGCACGTCTTCCAGCCTGACCTCGCGGCCATGGCCCCGGCTGTCCAGGCCGAAGAGGACGCGGGGGCAGCCGTAGGCGAGGAGGTCCACATCCTCCGTAGCGCAGGCCTGGATGCGC
Lp_Unigene81304_All	MN125951	GCGGGGCCGCGCGCTGCCGCCGGCAGGGGCAGCGGGGCCTCGTCATGGGGCACGCGGGAGAGCGCACGCCGCAGGTCCGGGCGGCCGAGCGCACCGGCGCGCGCCAGCAGGAAGCCCCAGCTGCGGCTCCGGACCTCCCAGCCGACGCAGAGGTCGGGGTCCGCGGAGCGCACGAGGCTGACGAGCTCCTCGAGCAAGGCCGCCTCG
